# Supplementary material for: Evaluation of the mechanism of the efficacy of Persicaria runcinata var. sinensis (Hemsl.) Bo Li on arthritis: an integrated widely targeted metabolomics and network pharmacology study
Source: Research Square preprint supplement (doi:10.21203/rs.3.rs-6208115/v1), 2025-03-26
Supplement: Supplementary file 1 [file 4dc7511a9521a3c12c6012f5.xlsx]

## Sheet: Sheet1
Index	Q1 (Da)	Q3 (Da)	Molecular weight (Da)	Formula	Ionization model	Compounds	物质	Class I	物质一级分类	Class II	物质二级分类	CAS	Level	5	QC01	QC02	QC03	cpd_ID	kegg_map
mws0260	175.119	116.071	174.112	C6H14N4O2	[M+H]+	L-Arginine	L-精氨酸	Amino acids and derivatives	氨基酸及其衍生物	Amino acids and derivatives	氨基酸及其衍生物	74-79-3	1	6.8805e+07	1.30027e+07	1.27766e+07	1.26384e+07	C00062	ko00220,ko00261,ko00330,ko00470,ko00970,ko01100,ko01110,ko01230,ko02010
MWSHY0177	443.097	139.039	442.09	C22H18O10	[M+H]+	Catechin gallate	儿茶素没食子酸酯	Flavonoids	黄酮	Flavanols	黄烷醇类	130405-40-2	1	5.22476e+07	1.80912e+07	1.95639e+07	1.76569e+07	-	-
Hmln000659	331.069	169.01	332.074	C13H16O10	[M-H]-	3-O-Galloyl-D-glucose	3-O-没食子酰-D-葡萄糖	Phenolic acids	酚酸类	Phenolic acids	酚酸类	-	1	4.39714e+07	2.07176e+07	1.82379e+07	1.8907e+07	-	-
mws0024	169.014	125.024	170.022	C7H6O5	[M-H]-	Gallic acid	没食子酸	Phenolic acids	酚酸类	Phenolic acids	酚酸类	149-91-7	1	3.84233e+07	8.71269e+06	9.40364e+06	9.09205e+06	C01424	ko00999
pmn001516	325.057	125.023	326.064	C14H14O9	[M-H]-	5-Galloylshikimic acid	5-没食子酰莽草酸	Phenolic acids	酚酸类	Phenolic acids	酚酸类	95719-51-0	1	3.60553e+07	5.73178e+07	5.77479e+07	6.0087e+07	-	-
Wmmp000182	300.998	300.999	302.006	C14H6O8	[M-H]-	ellagicacid	鞣质	Phenolic acids	酚酸类	Phenolic acids	酚酸类	-	1	2.94964e+07	3.28635e+07	3.16885e+07	3.16261e+07	-	-
mws0277	191.056	85.0296	192.063	C7H12O6	[M-H]-	Quinic Acid	奎宁酸	Organic acids	有机酸	Organic acids	有机酸	77-95-2	2	2.90924e+07	1.67192e+07	1.86948e+07	1.882e+07	C00296	ko00400,ko01100
mws2120	291.015	247.025	292.022	C13H8O8	[M-H]-	Brevifolin carboxylic acid	短叶苏木酚酸	Phenolic acids	酚酸类	Phenolic acids	酚酸类	18490-95-4	1	2.53938e+07	4.89832e+06	5.76803e+06	5.74604e+06	-	-
Wmmn002441	183.03	124.017	184.11	C10H16O3	[M-H]-	(E)-Linalool-1-oic acid	(E)-芳樟醇-1-酸	Lipids	脂质	Free fatty acids	游离脂肪酸	-	3	2.47433e+07	6.3357e+07	5.94023e+07	6.28188e+07	-	-
Lmyn002788	183.03	124.016	184.037	C8H8O5	[M-H]-	Methyl gallate	没食子酸甲酯	Phenolic acids	酚酸类	Phenolic acids	酚酸类	99-24-1	1	2.35519e+07	6.04605e+07	6.16412e+07	6.27911e+07	-	-
pme0040	136.062	119.035	135.054	C5H5N5	[M+H]+	Adenine	腺嘌呤	Nucleotides and derivatives	核苷酸及其衍生物	Nucleotides and derivatives	核苷酸及其衍生物	73-24-5	2	1.60217e+07	6.17678e+06	5.78717e+06	5.52249e+06	C00147	ko00230,ko00908,ko01100,ko01110,ko01232
HJN037	183.03	124.02	184.037	C8H8O5	[M-H]-	4-O-Methylgallic Acid	4-O-甲基没食子酸	Phenolic acids	酚酸类	Phenolic acids	酚酸类	4319-02-2	2	1.56828e+07	6.26317e+07	5.84328e+07	5.49701e+07	-	-
Lmxp000939	136.062	119.035	135.054	C5H5N5	[M+H]+	Zarzissine	1H-咪唑并(4,5-D)哒嗪-2-胺	Alkaloids	生物碱	Alkaloids	生物碱	160568-14-9	2	1.53888e+07	5.71482e+06	5.36482e+06	5.6203e+06	-	-
Zayn006347	329.03	298.983	330.038	C16H10O8	[M-H]-	3,3'-O-Dimethylellagic Acid	3,3'-O-二甲基鞣花酸	Tannins	鞣质	Tannin	鞣质	2239-88-5	1	1.46665e+07	2.22771e+06	2.12843e+06	2.00133e+06	-	-
mws0281	191.02	111.009	192.027	C6H8O7	[M-H]-	Citric Acid	柠檬酸	Organic acids	有机酸	Organic acids	有机酸	77-92-9	1	1.28924e+07	6.0116e+06	7.09895e+06	6.45882e+06	C00158	ko00020,ko00250,ko00630,ko01100,ko01110,ko01200,ko01210,ko01230,ko01240
Lmyn001519	285.025	133.015	286.033	C11H10O9	[M-H]-	L-Malic acid-2-O-gallate	L-苹果酸-2-O-没食子酸酯	Phenolic acids	酚酸类	Phenolic acids	酚酸类	-	1	1.25349e+07	604150	699453	758415	-	-
MWS04412	175.121	70.0658	174.137	C8H18N2O2	[M+H]+	N(6),N(6)-Dimethyl-L-lysine	N(6),N(6)-二甲基-L-赖氨酸	Amino acids and derivatives	氨基酸及其衍生物	Amino acids and derivatives	氨基酸及其衍生物	2259-86-1	2	1.21358e+07	2.22594e+06	1.97549e+06	2.05833e+06	-	-
pme0460	291.086	139.036	290.079	C15H14O6	[M+H]+	Epicatechin*	表儿茶素*	Flavonoids	黄酮	Flavanols	黄烷醇类	490-46-0	1	1.18428e+07	1.72712e+06	1.47262e+06	1.73666e+06	C09727	ko00941,ko01100,ko01110
mws0154	173.046	93.0346	174.053	C7H10O5	[M-H]-	Shikimic acid	莽草酸	Organic acids	有机酸	Organic acids	有机酸	138-59-0	1	1.06668e+07	3.38462e+06	2.9596e+06	3.15986e+06	C00493	ko00400,ko00996,ko00999,ko01100,ko01110,ko01230,ko01240
pmb1650	279.232	149.132	278.225	C18H30O2	[M+H]+	Octadeca-11E,13E,15Z-trienoic acid	十八碳-9E,13E,15Z-三烯酸	Lipids	脂质	Free fatty acids	游离脂肪酸	25575-00-2	3	1.03246e+07	6.66742e+06	6.20867e+06	6.33476e+06	-	-
pmn001515	325.057	93.0335	326.064	C14H14O9	[M-H]-	3-Galloylshikimic acid	3-没食子酰莽草酸	Phenolic acids	酚酸类	Phenolic acids	酚酸类	110082-91-2	1	1.01948e+07	5.31325e+06	5.62185e+06	5.55201e+06	-	-
Zazp002547	205.096	146.06	204.09	C11H12N2O2	[M+H]+	cyclo-(Gly-Phe)	环(丙氨酰-苯丙氨酸)	Amino acids and derivatives	氨基酸及其衍生物	Amino acids and derivatives	氨基酸及其衍生物	10125-07-2	1	9.87063e+06	4.25813e+07	3.98081e+07	4.17016e+07	-	-
pmp001251	520.34	184.073	519.332	C26H50NO7P	[M+H]+	LysoPC 18:2(2n isomer)	溶血磷脂酰胆碱 18:2(2n异构)	Lipids	脂质	LPC	溶血磷脂酰胆碱	-	1	9.77458e+06	3.69886e+07	3.63795e+07	3.6242e+07	-	-
Zmyn000453	191.02	111.009	192.027	C6H8O7	[M-H]-	Isocitric Acid	异柠檬酸	Organic acids	有机酸	Organic acids	有机酸	320-77-4	1	9.67504e+06	4.20425e+06	4.33084e+06	4.29785e+06	C00311	ko00020,ko00630,ko01100,ko01110,ko01200,ko01210,ko01230,ko01240
MWSHY0065	291.086	139.038	290.079	C15H14O6	[M+H]+	Catechin*	儿茶素*	Flavonoids	黄酮	Flavanols	黄烷醇类	154-23-4	1	9.57927e+06	3.39595e+06	3.22768e+06	2.7987e+06	C06562	ko00941,ko01110
Wmhn001495	483.077	169.014	484.085	C20H20O14	[M-H]-	1,4-Di-O-Galloyl-D-glucose*	1,4-二-O-没食子酰-D-葡萄糖*	Phenolic acids	酚酸类	Phenolic acids	酚酸类	-	2	9.54374e+06	4.67681e+06	5.03644e+06	4.69401e+06	-	-
Zmhn004909	477.058	169.015	478.075	C21H18O13	[M-H]-	3,4-Digalloylshikimic acid	3,4-二没食子酰莽草酸	Phenolic acids	酚酸类	Phenolic acids	酚酸类	-	1	9.53358e+06	8.14839e+06	7.99414e+06	8.41934e+06	-	-
Lmsn003409	477.104	169.014	478.111	C22H22O12	[M-H]-	1-O-Galloyl-6-O-p-Coumaroyl-β-D-glucose*	1-O-没食子酰-6-O-对香豆酰-β-D-葡萄糖*	Phenolic acids	酚酸类	Phenolic acids	酚酸类	-	2	9.17743e+06	7.04245e+06	5.50826e+06	7.70542e+06	-	-
pme0230	268.104	136.062	267.097	C10H13N5O4	[M+H]+	Adenosine	腺苷	Nucleotides and derivatives	核苷酸及其衍生物	Nucleotides and derivatives	核苷酸及其衍生物	58-61-7	1	9.15229e+06	3.10879e+07	2.9033e+07	2.87967e+07	C00212	ko00230,ko01100,ko01232,ko02010
Lhhp120812	279.158	149.023	278.152	C16H22O4	[M+H]+	Methylillicinone F	甲基芥子酮F	Lignans and Coumarins	木脂素和香豆素	Coumarins	香豆素	-	1	8.83049e+06	2.04636e+06	1.96138e+06	1.93754e+06	-	-
MWS04447	130.086	70.0667	129.079	C6H11NO2	[M+H]+	Homoproline	高脯氨酸	Amino acids and derivatives	氨基酸及其衍生物	Amino acids and derivatives	氨基酸及其衍生物	56879-46-0	2	8.22766e+06	1.90986e+06	1.70578e+06	1.77465e+06	-	-
pme2827	239.238	223.242	240.245	C16H32O	[M-H]-	Palmitaldehyde	棕榈醛	Lipids	脂质	Free fatty acids	游离脂肪酸	629-80-1	3	8.21571e+06	4.14738e+06	4.17489e+06	4.37591e+06	C00517	ko00071
mws0250	182.081	136.076	181.074	C9H11NO3	[M+H]+	L-Tyrosine	L-酪氨酸	Amino acids and derivatives	氨基酸及其衍生物	Amino acids and derivatives	氨基酸及其衍生物	60-18-4	1	8.09923e+06	2.11e+07	2.16477e+07	2.01758e+07	C00082	ko00130,ko00261,ko00350,ko00360,ko00400,ko00460,ko00730,ko00940,ko00950,ko00965,ko00966,ko00970,ko00999,ko01100,ko01110,ko01210,ko01230,ko01240
Lmsn004162	477.104	169.014	478.111	C22H22O12	[M-H]-	1-O-Galloyl-2-O-p-Coumaroyl-β-D-glucose	1-O-没食子酰-2-O-对香豆酰-β-D-葡萄糖	Phenolic acids	酚酸类	Phenolic acids	酚酸类	94356-18-0	2	7.78953e+06	6.67643e+06	7.45259e+06	7.7325e+06	-	-
Wbtp003341	291.087	139.038	290.079	C15H14O6	[M+H]+	(3,5-dihydroxyphenyl)-(4-hydroxy-2,6-dimethoxyphenyl)methanone	(3,5-二羟基苯基)-(4-羟基-2,6-二甲氧基苯基)甲酮	Others	其它类	Ketone compounds	酮类化合物	-	1	7.71397e+06	2.5315e+06	3.09583e+06	2.91147e+06	-	-
pme0309	183.03	124.017	184.037	C8H8O5	[M-H]-	3-O-Methylgallic Acid	3-O-甲基没食子酸	Phenolic acids	酚酸类	Phenolic acids	酚酸类	3934-84-7	1	7.66435e+06	3.34443e+07	3.44629e+07	3.6398e+07	C05616	-
mws1433	314.139	177.055	313.131	C18H19NO4	[M+H]+	N-Feruloyltyramine	N-阿魏酰酪胺	Alkaloids	生物碱	Phenolamine	酚胺	66648-43-9	1	7.54808e+06	1.2922e+06	1.23563e+06	1.24177e+06	C02717	-
Zblp005777	314.139	177.055	313.131	C18H19NO4	[M+H]+	N-trans-ferulicacidacylp-hydroxyphenylethylamine	N-反式-阿魏酸酰对羟基苯乙胺	Alkaloids	生物碱	Phenolamine	酚胺	-	1	7.47701e+06	1.39478e+06	1.27207e+06	1.24166e+06	-	-
MWSHY0046	465.103	303.051	464.096	C21H20O12	[M+H]+	Quercetin-3-O-glucoside (Isoquercitrin)	槲皮素-3-O-葡萄糖苷(异槲皮苷)	Flavonoids	黄酮	Flavonols	黄酮醇	482-35-9	1	7.34317e+06	6.19774e+07	5.98663e+07	5.80708e+07	C05623	ko00944,ko01100,ko01110
Hajp012062	279.159	149.025	278.152	C16H22O4	[M+H]+	Dibutyl phthalate	邻苯二甲酸二丁酯	Organic acids	有机酸	Organic acids	有机酸	84-74-2	1	7.04852e+06	5.08332e+06	5.29537e+06	5.08411e+06	C14214	-
Zbdp001892	268.103	136.061	267.09	C16H13NO3	[M+H]+	7-Methoxy-3-[1-(3-pyridyl)methylidene]-4-chromanone	7-甲氧基-3-[1-(3-吡啶基)亚甲基]-4-二氢色原酮	Flavonoids	黄酮	Other Flavonoids	其它类黄酮	-	1	6.93947e+06	2.74017e+07	2.55891e+07	2.53011e+07	-	-
Zmbp002538	205.097	146.061	204.09	C11H12N2O2	[M+H]+	1-Methoxy-indole-3-acetamide	1-甲氧基-吲哚-3-乙酰胺	Alkaloids	生物碱	Plumerane	吲哚类生物碱	-	1	6.75321e+06	3.27476e+07	3.02726e+07	2.95565e+07	-	-
Zmyn000155	173.105	131.083	174.1	C7H14N2O3	[M-H]-	N-α-Acetyl-L-ornithine	N-α-乙酰基-L-鸟氨酸	Amino acids and derivatives	氨基酸及其衍生物	Amino acids and derivatives	氨基酸及其衍生物	6205-08-9	1	6.69218e+06	700104	990491	716704	C00437	ko00220,ko01100,ko01110,ko01210,ko01230
Lmqn004838	315.015	299.992	316.022	C15H8O8	[M-H]-	3-O-Methylellagic acid	3-O-甲基鞣花酸	Tannins	鞣质	Tannin	鞣质	-	1	6.00452e+06	1.42494e+06	1.3302e+06	1.41235e+06	-	-
Xmbp001692	171.028	81.0332	170.022	C7H6O5	[M+H]+	2,4,6-Trihydroxybenzoic acid	2,4,6-三羟基苯甲酸	Phenolic acids	酚酸类	Phenolic acids	酚酸类	83-30-7	2	5.64541e+06	1.26132e+06	1.24386e+06	1.23683e+06	-	-
mws1090	259.022	96.9696	260.03	C6H13O9P	[M-H]-	Glucose-1-phosphate	葡萄糖-1-磷酸	Others	其它类	Saccharides	糖类	59-56-3	1	5.53775e+06	1.40624e+06	1.26993e+06	1.24288e+06	C00103	ko00010,ko00040,ko00052,ko00500,ko00520,ko00523,ko00561,ko01100,ko01110,ko01240,ko01250
pme0014	148.06	84.0444	147.053	C5H9NO4	[M+H]+	L-Glutamic acid	L-谷氨酸	Amino acids and derivatives	氨基酸及其衍生物	Amino acids and derivatives	氨基酸及其衍生物	56-86-0	3	5.2413e+06	2.71268e+06	2.60618e+06	2.68142e+06	C00025	ko00220,ko00250,ko00330,ko00332,ko00340,ko00430,ko00470,ko00480,ko00524,ko00630,ko00650,ko00660,ko00860,ko00910,ko00970,ko01100,ko01110,ko01200,ko01210,ko01230,ko01240,ko02010
MWStz070	182.081	91.0548	181.074	C9H11NO3	[M+H]+	N-(2-Hydroxy-4-methoxyphenyl)acetamide	N-(2-羟基-4-甲氧基苯基)乙酰胺	Alkaloids	生物碱	Phenolamine	酚胺	58469-06-0	1	5.13067e+06	1.25974e+07	1.24253e+07	1.11212e+07	-	-
ML10181668	130.086	84.0809	129.079	C6H11NO2	[M+H]+	Cycloleucine	环亮氨酸	Amino acids and derivatives	氨基酸及其衍生物	Amino acids and derivatives	氨基酸及其衍生物	52-52-8	1	4.4247e+06	5.64905e+06	5.51693e+06	5.72746e+06	C03969	-
Lmhp010190	522.355	184.073	521.348	C26H52NO7P	[M+H]+	LysoPC 18:1(2n isomer)	溶血磷脂酰胆碱 18:1(2n异构)	Lipids	脂质	LPC	溶血磷脂酰胆碱	-	1	4.37482e+06	6.57485e+06	6.43096e+06	5.93139e+06	-	-
Lmfn000797	483.078	169.014	484.085	C20H20O14	[M-H]-	2,3-Di-O-Galloyl-β-D-Glucose	2,3-二-O-没食子酰-β-D-葡萄糖	Phenolic acids	酚酸类	Phenolic acids	酚酸类	-	2	4.32952e+06	2.09654e+06	1.84444e+06	1.81858e+06	-	-
pmp001287	120.081	103.055	119.073	C8H9N	[M+H]+	N-Benzylmethylene isomethylamine	N-苯亚甲基异甲胺	Alkaloids	生物碱	Alkaloids	生物碱	-	1	4.18888e+06	2.91753e+07	2.85957e+07	2.846e+07	-	-
pme0026	147.113	84.0808	146.106	C6H14N2O2	[M+H]+	L-Lysine	L-赖氨酸	Amino acids and derivatives	氨基酸及其衍生物	Amino acids and derivatives	氨基酸及其衍生物	56-87-1	1	4.07369e+06	1.16947e+06	983861	971413	C00047	ko00300,ko00310,ko00470,ko00780,ko00960,ko00970,ko01100,ko01110,ko01210,ko01230,ko02010
mws0866	259.022	96.9696	260.03	C6H13O9P	[M-H]-	D-Glucose 6-phosphate	D-葡萄糖-6-磷酸	Others	其它类	Saccharides	糖类	56-73-5	1	3.93266e+06	1.08696e+06	1.06429e+06	1.092e+06	C00092	ko00500,ko00524,ko00562,ko01100,ko01110
Zmdp000376	130.091	84.0806	129.09	C5H11N3O	[M+H]+	4-Guanidinobutanal	4-胍基丁醛	Others	其它类	Aldehyde compounds	醛类化合物	-	1	3.76231e+06	5.23435e+06	5.09943e+06	5.03796e+06	-	-
MWS2442	259.022	96.9688	260.03	C6H13O9P	[M-H]-	D-Fructose 6-Phosphate	D-果糖-6-磷酸	Others	其它类	Saccharides	糖类	643-13-0	1	3.6284e+06	983889	983630	934994	C00085	ko00052,ko00500,ko00710,ko01100,ko01110,ko01200
pme0193	147.076	84.0444	146.069	C5H10N2O3	[M+H]+	L-Glutamine	L-谷氨酰胺	Amino acids and derivatives	氨基酸及其衍生物	Amino acids and derivatives	氨基酸及其衍生物	56-85-9	2	3.42387e+06	2.72039e+06	2.57147e+06	2.68399e+06	C00064	ko00220,ko00230,ko00240,ko00250,ko00470,ko00630,ko00750,ko00910,ko00970,ko01100,ko01230,ko01232,ko01240,ko02010
pmb0874	478.293	337.274	477.286	C23H44NO7P	[M+H]+	LysoPE 18:2(2n isomer)	溶血磷脂酰乙醇胺 18:2(2n异构)	Lipids	脂质	LPE	溶血磷脂酰乙醇胺	-	2	3.371e+06	7.28223e+06	6.93149e+06	6.69509e+06	-	-
pma2987	142.097	124.087	141.09	C6H11N3O	[M+H]+	Histidinol	组氨醇	Alkaloids	生物碱	Alkaloids	生物碱	501-28-0	3	3.17557e+06	4.51264e+06	4.30343e+06	4.20205e+06	C00860	ko00340,ko01100,ko01110,ko01230
mws0470	117.019	73.0295	118.027	C4H6O4	[M-H]-	Methylmalonic acid	甲基丙二酸	Organic acids	有机酸	Organic acids	有机酸	516-05-2	2	2.88375e+06	1.14944e+07	1.22343e+07	1.16058e+07	C02170	ko00240,ko00280,ko00640,ko01100
pmb1754	184.073	125.001	184.073	C5H15NO4P+	[M]+	O-Phosphocholine	O-磷酸胆碱	Alkaloids	生物碱	Alkaloids	生物碱	107-73-3	3	2.86603e+06	1.00912e+06	995959	993865	C00588	ko00564,ko01100
MWSHY0171	579.15	409.092	578.142	C30H26O12	[M+H]+	Procyanidin B2	原花青素 B2	Tannins	鞣质	Proanthocyanidins	原花青素	29106-49-8	1	2.74899e+06	627912	637844	536241	C17639	-
MWS20201	333.082	171.029	332.074	C13H16O10	[M+H]+	1-O-Galloyl-β-D-glucose	1-O-没食子酰-β-D-葡萄糖	Phenolic acids	酚酸类	Phenolic acids	酚酸类	58511-73-2	1	2.73462e+06	725637	699405	721982	C01158	ko00999
mws1337	220.118	90.0549	219.111	C9H17NO5	[M+H]+	D-Pantothenic Acid	D-泛酸(维生素B5)	Others	其它类	Vitamin	维生素	79-83-4	1	2.70426e+06	3.95579e+06	4.04011e+06	4.45385e+06	C00864	ko00410,ko00770,ko01100,ko01110,ko01240
mws1587	132.102	86.0964	131.095	C6H13NO2	[M+H]+	L-Norleucine*	L-正亮氨酸*	Amino acids and derivatives	氨基酸及其衍生物	Amino acids and derivatives	氨基酸及其衍生物	327-57-1	1	2.60626e+06	2.47494e+07	1.52781e+07	1.44268e+07	C01933	-
Zmjp000182	189.134	70.0652	188.127	C7H16N4O2	[M+H]+	N-Monomethyl-L-arginine	N-单甲基-L-精氨酸	Amino acids and derivatives	氨基酸及其衍生物	Amino acids and derivatives	氨基酸及其衍生物	17035-90-4	1	2.50526e+06	613339	599175	606509	C03884	-
pmp001264	274.274	256.265	273.267	C16H35NO2	[M+H]+	Hexadecylsphingosine	十六烷基鞘胺醇	Lipids	脂质	Sphingolipids	鞘脂	-	2	2.48698e+06	1.698e+06	1.55513e+06	1.45593e+06	-	-
pme2246	300.999	185.023	302.006	C14H6O8	[M-H]-	Ellagic acid	鞣花酸	Tannins	鞣质	Tannin	鞣质	476-66-4	1	2.41132e+06	2.49084e+06	2.61138e+06	2.49889e+06	C10788	-
mws0275	133.014	71.0145	134.022	C4H6O5	[M-H]-	L-Malic acid	L-苹果酸	Organic acids	有机酸	Organic acids	有机酸	97-67-6	1	2.39837e+06	3.29841e+06	3.28249e+06	3.5666e+06	C00149	ko00020,ko00620,ko00630,ko00710,ko01100,ko01110,ko01200
pmp001273	520.34	184.073	519.332	C26H50NO7P	[M+H]+	LysoPC 18:2	溶血磷脂酰胆碱 18:2	Lipids	脂质	LPC	溶血磷脂酰胆碱	-	1	2.36414e+06	8.76109e+06	8.5195e+06	8.27297e+06	-	-
Zmdp000292	189.135	70.0652	188.127	C7H16N4O2	[M+H]+	Arginine methyl ester	精氨酸甲酯	Amino acids and derivatives	氨基酸及其衍生物	Amino acids and derivatives	氨基酸及其衍生物	-	1	2.31958e+06	651587	658940	651587	-	-
MWS04555g	132.102	86.0975	131.095	C6H13NO2	[M+H]+	D-Allo-Isoleucine*	别异亮氨酸*	Amino acids and derivatives	氨基酸及其衍生物	Amino acids and derivatives	氨基酸及其衍生物	1509-35-9	1	2.2781e+06	1.62367e+07	1.52391e+07	1.46187e+07	-	-
Lmwp011196	391.284	149.023	390.277	C24H38O4	[M+H]+	Bis(2-ethylhexyl)phthalate*	邻苯二甲酸二(2-乙基己基)酯*	Phenolic acids	酚酸类	Phenolic acids	酚酸类	117-81-7	2	2.2431e+06	811715	754678	715190	C03690	-
mws0258	132.102	86.0964	131.095	C6H13NO2	[M+H]+	L-Isoleucine*	L-异亮氨酸*	Amino acids and derivatives	氨基酸及其衍生物	Amino acids and derivatives	氨基酸及其衍生物	73-32-5	1	2.17859e+06	1.68131e+07	2.48259e+07	2.12621e+07	C00407	ko00280,ko00290,ko00460,ko00960,ko00966,ko00970,ko01100,ko01110,ko01210,ko01230,ko02010
Lmsn001477	633.073	300.997	634.081	C27H22O18	[M-H]-	1-O-Galloyl-4,6-(S)-HHDP-β-D-glucose	1-O-没食子酰-4,6-(S)-六羟基二苯甲酰基-β-D-葡萄糖	Phenolic acids	酚酸类	Phenolic acids	酚酸类	-	2	2.17046e+06	152701	156364	152552	-	-
Lmmp010562	391.284	149.023	390.277	C24H38O4	[M+H]+	Diisooctyl Phthalate*	邻苯二甲酸二异辛酯*	Phenolic acids	酚酸类	Phenolic acids	酚酸类	27554-26-3	2	2.16311e+06	832262	842283	816266	C14577	-
mws4516	130.05	84.0454	129.043	C5H7NO3	[M+H]+	Pyroglutamic acid	L-焦谷氨酸	Amino acids and derivatives	氨基酸及其衍生物	Amino acids and derivatives	氨基酸及其衍生物	4042-36-8	2	2.14133e+06	3.34377e+06	3.35348e+06	3.02544e+06	-	-
Zbsp001807	315.071	153.019	314.064	C13H14O9	[M+H]+	Salicylacyl Glucuronide	水杨酰基葡糖苷酸	Others	其它类	Others	其它	-	2	2.12558e+06	283884	272299	305100	-	-
mws0133	123.055	80.0494	122.048	C6H6N2O	[M+H]+	Nicotinamide	烟酰胺	Others	其它类	Vitamin	维生素	98-92-0	3	2.06511e+06	294370	259264	252933	C00153	ko00760,ko01100,ko01240
Zbyn003347	423.093	169.013	424.101	C19H20O11	[M-H]-	4-O-Galloylarbutin	4-O-没食子酰熊果苷	Phenolic acids	酚酸类	Phenolic acids	酚酸类	-	2	2.05107e+06	776987	630497	660154	-	-
pmn001606	309.28	309.28	310.287	C20H38O2	[M-H]-	Eicosenoic acid	二十碳烯酸	Lipids	脂质	Free fatty acids	游离脂肪酸	26764-41-0	2	2.02065e+06	6.05245e+06	4.79423e+06	5.80312e+06	C16526	ko01040
pmb0855	496.34	184.073	495.332	C24H50NO7P	[M+H]+	LysoPC 16:0	溶血磷脂酰胆碱 16:0	Lipids	脂质	LPC	溶血磷脂酰胆碱	17364-16-8	1	1.95844e+06	1.4734e+07	1.37387e+07	1.39051e+07	-	-
mws0344	165.041	75.0091	166.048	C5H10O6	[M-H]-	D-Xylonic acid	D-木糖酸	Others	其它类	Saccharides	糖类	526-91-0	1	1.86379e+06	1.16873e+06	1.08722e+06	1.16295e+06	C00502	ko00040,ko01100
pmn001525	477.14	169	478.147	C23H26O11	[M-H]-	3,5-Digalloylshikimic acid	3,5-二没食子酰莽草酸	Phenolic acids	酚酸类	Phenolic acids	酚酸类	95753-52-9	3	1.84577e+06	1.29127e+07	1.24968e+07	1.25296e+07	-	-
pme2268	138.055	94.0651	137.048	C7H7NO2	[M+H]+	Trigonelline	葫芦巴碱	Alkaloids	生物碱	Pyridine alkaloids	吡啶类生物碱	535-83-1	1	1.81581e+06	3.3343e+06	2.72641e+06	2.50628e+06	C01004	ko00760
Zmpn000199	209.03	85.0297	210.038	C6H10O8	[M-H]-	D-Galactaric acid	D-半乳糖二酸	Others	其它类	Saccharides	糖类	526-99-8	2	1.80847e+06	881370	933254	941135	C00879	ko00053,ko01100
Lmyn000160	237.062	87.0085	238.069	C8H14O8	[M-H]-	Mucic acid Dimethyl Ester	粘酸二甲酯	Phenolic acids	酚酸类	Phenolic acids	酚酸类	-	1	1.80097e+06	668977	711364	702499	-	-
Zmdp000972	136.042	91.0537	135.035	C4H9NO2S	[M+H]+	S-Methyl-L-cysteine	S-甲基-L-半胱氨酸	Amino acids and derivatives	氨基酸及其衍生物	Amino acids and derivatives	氨基酸及其衍生物	1187-84-4	2	1.76201e+06	5.02644e+06	5.02666e+06	5.02837e+06	C22040	ko02010
pmp001285	149.023	65.0406	148.016	C8H4O3	[M+H]+	Phthalic anhydride	邻苯二甲酸酐	Phenolic acids	酚酸类	Phenolic acids	酚酸类	85-44-9	1	1.67756e+06	1.29028e+06	1.25458e+06	1.20643e+06	-	-
pme0534	195.051	75.0095	196.058	C6H12O7	[M-H]-	Gluconic acid	葡萄糖酸	Others	其它类	Saccharides	糖类	526-95-4	1	1.61591e+06	6.34959e+06	6.31961e+06	5.46311e+06	C00257	ko00030,ko01100,ko01110,ko01200
mws0567	146.092	87.0441	145.085	C5H11N3O2	[M+H]+	4-Guanidinobutyric acid	4-胍基丁酸	Organic acids	有机酸	Organic acids	有机酸	463-00-3	2	1.59589e+06	1.24273e+06	1.15412e+06	1.24786e+06	C01035	ko00330,ko01100
Hmdn001963	305.03	273.004	306.038	C14H10O8	[M-H]-	Methyl Brevifolincarboxylate	短叶苏木酚酸甲酯	Phenolic acids	酚酸类	Phenolic acids	酚酸类	154702-76-8	1	1.59121e+06	2.0514e+06	1.57467e+06	2.08542e+06	-	-
mws0254	156.077	110.071	155.07	C6H9N3O2	[M+H]+	L-Histidine	L-组氨酸	Amino acids and derivatives	氨基酸及其衍生物	Amino acids and derivatives	氨基酸及其衍生物	71-00-1	1	1.56121e+06	387269	411463	389850	C00135	ko00340,ko00410,ko00470,ko00970,ko01100,ko01110,ko01230,ko02010
Zmhn005413	335.039	183.031	336.048	C15H12O9	[M-H]-	p-Dimeric galloyl methyl ester	对二聚没食子酰甲酯	Phenolic acids	酚酸类	Phenolic acids	酚酸类	-	1	1.56115e+06	1.60458e+07	1.73751e+07	1.56868e+07	-	-
pme1738	138.079	94.0651	137.071	C7H9N2O	[M+H]+	3-Carbamyl-1-methylpyridinium;(1-Methylnicotinamide)	3-氨基甲酰-1-甲基氧化吡啶	Alkaloids	生物碱	Pyridine alkaloids	吡啶类生物碱	1005-24-9	3	1.54202e+06	3.2181e+06	2.80328e+06	2.34135e+06	C02918	ko00760,ko01100
Lmsn003582	477.104	169.014	478.111	C22H22O12	[M-H]-	1-O-Galloyl-4-O-p-Coumaroyl-β-D-glucose*	1-O-没食子酰-4-O-对香豆酰-β-D-葡萄糖*	Phenolic acids	酚酸类	Phenolic acids	酚酸类	-	2	1.51421e+06	950235	819831	954632	-	-
mws1080	341.109	179.056	342.116	C12H22O11	[M-H]-	Galactinol	肌醇半乳糖苷	Others	其它类	Saccharides	糖类	3687-64-7	1	1.49333e+06	2.71187e+06	2.66204e+06	2.5564e+06	C01235	ko00052,ko01100
MA10039641	341.109	89.0246	342.116	C12H22O11	[M-H]-	Lactobiose	乳二糖	Others	其它类	Saccharides	糖类	63-42-3	1	1.48435e+06	3.22193e+06	2.89356e+06	3.14347e+06	C00243	ko00052,ko01100,ko02010
Lmdn000766	421.135	169.051	422.142	C17H26O12	[M-H]-	Acetylcatalpol	乙酰梓醇	Terpenoids	萜类	Monoterpenoids	倍萜	-	2	1.46793e+06	165371	161612	157604	-	-
MWS0811	130.086	84.0818	129.079	C6H11NO2	[M+H]+	L-Pipecolic Acid	L-哌啶酸	Organic acids	有机酸	Organic acids	有机酸	3105-95-1	2	1.41681e+06	2.23336e+06	2.26251e+06	2.02406e+06	C00408	ko00310,ko00960,ko01100,ko01110
pmf0175	157.16	157.16	158.167	C10H22O	[M-H]-	2-Decanol*	2-癸醇*	Others	其它类	Saccharides	糖类	1120-06-5	3	1.38563e+06	1.7054e+06	1.69529e+06	1.73713e+06	-	-
pmn001534	787.1	617.077	788.107	C34H28O22	[M-H]-	1,2,3,6-Tetra-O-galloyl-β-D-glucose	1,2,3,6-四-O-没食子酰-β-D-葡萄糖	Phenolic acids	酚酸类	Phenolic acids	酚酸类	79886-50-3	1	1.35331e+06	1.26435e+06	1.45482e+06	1.55794e+06	C04516	-
pmb2922	565.048	323.029	566.055	C15H24N2O17P2	[M-H]-	Uridine 5'-diphospho-D-glucose	尿苷 5'-二磷酸-D-葡萄糖	Nucleotides and derivatives	核苷酸及其衍生物	Nucleotides and derivatives	核苷酸及其衍生物	133-89-1	2	1.33202e+06	338897	318249	328420	C00029	ko00040,ko00052,ko00053,ko00500,ko00520,ko00524,ko00561,ko00908,ko01100,ko01110,ko01240,ko01250
Latp011219	149.096	121.064	148.088	C10H12O	[M+H]+	3,5-Dimethyl-2,3-dihydrobenzofuran	3,5-二甲基-5-甲基-2,3-二氢苯并呋喃	Others	其它类	Others	其它	-	2	1.31007e+06	796382	844555	801714	-	-
pmb3055	513.125	191.1	514.132	C22H26O14	[M-H]-	p-Coumaroylquinic acid-4'-O-glucuronide	对香豆酰奎宁酸-4'-O-葡萄糖醛酸苷	Phenolic acids	酚酸类	Phenolic acids	酚酸类	-	3	1.30846e+06	125837	134525	140767	-	-
pmb0484	104.107	60.0808	104.107	C5H14NO+	[M]+	Choline	胆碱	Alkaloids	生物碱	Alkaloids	生物碱	62-49-7	3	1.26593e+06	3.68794e+06	3.32819e+06	3.23805e+06	C00114	ko00260,ko00564,ko01100,ko02010
pmp000413	433.113	283.061	432.106	C21H20O10	[M+H]+	Genistein-8-C-glucoside	染料木素-8-C-葡萄糖苷	Flavonoids	黄酮	Isoflavones	异黄酮	66026-80-0	2	1.26359e+06	135143	135143	141403	C10420	-
pme0021	166.086	120.081	165.079	C9H11NO2	[M+H]+	L-Phenylalanine	L-苯丙氨酸	Amino acids and derivatives	氨基酸及其衍生物	Amino acids and derivatives	氨基酸及其衍生物	63-91-2	1	1.26321e+06	4.90289e+06	4.66139e+06	5.07076e+06	C00079	ko00360,ko00400,ko00460,ko00470,ko00940,ko00960,ko00966,ko00970,ko00996,ko00999,ko01100,ko01110,ko01210,ko01230,ko02010
Lmqp000427	146.081	82.0656	145.074	C6H11NO3	[M+H]+	N-Methyl-Trans-4-Hydroxy-L-Proline	N-甲基-反式-4-羟基-L-脯氨酸	Amino acids and derivatives	氨基酸及其衍生物	Amino acids and derivatives	氨基酸及其衍生物	4252-82-8	2	1.25904e+06	1.64181e+06	1.61227e+06	1.51485e+06	-	-
pmp001281	522.355	184.073	521.348	C26H52NO7P	[M+H]+	LysoPC 18:1	溶血磷脂酰胆碱 18:1	Lipids	脂质	LPC	溶血磷脂酰胆碱	-	1	1.24494e+06	1.16956e+06	1.04865e+06	1.07638e+06	-	-
pme1383	170.081	134.06	169.074	C8H11NO3	[M+H]+	Pyridoxine	吡哆醇	Others	其它类	Vitamin	维生素	65-23-6	3	1.21883e+06	1.45056e+06	1.66106e+06	1.41735e+06	C00314	ko00750,ko01100,ko01240
MWSHY0181	433.113	313.072	432.106	C21H20O10	[M+H]+	Apigenin-8-C-Glucoside (Vitexin)	芹菜素-8-C-葡萄糖苷 (牡荆素)	Flavonoids	黄酮	Flavones	黄酮	3681-93-4	2	1.18082e+06	129522	136803	130538	C01460	ko00941,ko00944
Zbyn004414	787.098	617.076	788.106	C34H28O22	[M-H]-	1,2,4,6-tetra-O-galloyl-β-D-glucose	1,2,4,6-四氧没食子酰葡萄糖	Phenolic acids	酚酸类	Phenolic acids	酚酸类	-	1	1.17951e+06	1.55231e+06	1.24795e+06	1.2931e+06	-	-
MA10039492	173.009	71.0341	174.016	C6H6O6	[M-H]-	Dehydroascorbic acid	脱氢抗坏血酸	Others	其它类	Vitamin	维生素	490-83-5	2	1.15532e+06	297916	295370	309033	C05422	ko00053,ko00480,ko01100
mws0219	132.03	88.0404	133.037	C4H7NO4	[M-H]-	L-Aspartic Acid	L-天冬氨酸	Amino acids and derivatives	氨基酸及其衍生物	Amino acids and derivatives	氨基酸及其衍生物	56-84-8	1	1.094e+06	625712	648280	670360	C00049	ko00220,ko00250,ko00260,ko00261,ko00270,ko00300,ko00340,ko00410,ko00460,ko00470,ko00710,ko00760,ko00770,ko00970,ko00999,ko01100,ko01110,ko01200,ko01210,ko01230,ko01240,ko02010
pmb0856	480.308	339.289	479.301	C23H46NO7P	[M+H]+	LysoPE 18:1(2n isomer)	溶血磷脂酰乙醇胺 18:1(2n异构)	Lipids	脂质	LPE	溶血磷脂酰乙醇胺	-	3	1.05728e+06	536574	532307	500694	-	-
pmp001254	625.254	488.17	624.247	C36H36N2O8	[M+H]+	Grossamide	克罗酰胺	Alkaloids	生物碱	Phenolamine	酚胺	80510-06-1	1	1.05226e+06	166720	167953	166347	-	-
MWS2027	129.03	68.9967	128.022	C4H4N2O3	[M+H]+	Barbituric acid;Malonylurea;2,4,6-Pyrimidinetrione	巴比妥酸;丙二酰脲;2,4,6-嘧啶三酮	Nucleotides and derivatives	核苷酸及其衍生物	Nucleotides and derivatives	核苷酸及其衍生物	67-52-7	3	1.01811e+06	169149	121598	155599	C00813	ko00240,ko01100
Wbmp003302	165.09	91.0528	164.084	C10H12O2	[M+H]+	Frambinone	羟苯基丁酮	Others	其它类	Ketone compounds	酮类化合物	-	2	1.0167e+06	1.54242e+06	1.61567e+06	1.53776e+06	-	-
mws0018	203.223	84.081	202.216	C10H26N4	[M+H]+	Spermine	精胺	Alkaloids	生物碱	Alkaloids	生物碱	71-44-3	3	1.00732e+06	1.04007e+06	1.02938e+06	947718	C00750	ko00330,ko00410,ko00480,ko00770,ko01100,ko01240
pmb0876	454.293	313.274	453.286	C21H44NO7P	[M+H]+	LysoPE 16:0	溶血磷脂酰乙醇胺 16:0	Lipids	脂质	LPE	溶血磷脂酰乙醇胺	53862-35-4	1	988460	2.88829e+06	2.84718e+06	2.52088e+06	-	-
Zmdn011161	239.071	223.032	240.079	C15H12O3	[M-H]-	Chrysophanol-9-anthrone	大黄酚-9-蒽酮	Quinones	醌类	Anthraquinone	蒽醌	491-58-7	2	979201	823424	795309	1.07743e+06	C10314	-
Wafn002081	285.062	153.02	286.069	C12H14O8	[M-H]-	Dihydroxybenzoyl xyloside	二羟基苯甲酰木糖苷	Phenolic acids	酚酸类	Phenolic acids	酚酸类	-	1	959174	672146	676440	640256	-	-
Zmlp007578	345.059	313.033	344.053	C17H12O8	[M+H]+	3,3',4-O-Trimethylellagic acid	3,3',4-O-三甲基鞣花酸	Tannins	鞣质	Tannin	鞣质	1617-49-8	2	918167	29617	40068	35913	C10836	-
MWS0552	239.202	223.026	240.209	C15H28O2	[M-H]-	Cis-10-Pentadecenoic Acid(C15:1)	顺-10-十五碳烯酸	Lipids	脂质	Free fatty acids	游离脂肪酸	84743-29-3	2	906527	866067	874553	884379	-	-
Zmyn000108	209.031	85.0294	210.038	C6H10O8	[M-H]-	D-Saccharic acid	D-蔗糖酸	Others	其它类	Saccharides	糖类	87-73-0	2	860352	449035	539746	541800	C00818	ko00053,ko01100
Lmyn003835	289.035	137.024	290.043	C14H10O7	[M-H]-	4-(3,4,5-Trihydroxybenzoxy)benzoic acid	4-(3,4,5-三羟基苯甲氧基)苯甲酸	Phenolic acids	酚酸类	Phenolic acids	酚酸类	-	2	813873	824249	801505	713399	-	-
pmc0066	333.06	137.05	332.052	C10H13N4O7P	[M+H]+	2'-Deoxyinosine-5'-monophosphate	2'-脱氧肌苷-5'-单磷酸	Nucleotides and derivatives	核苷酸及其衍生物	Nucleotides and derivatives	核苷酸及其衍生物	3393-18-8	3	710575	392923	297648	357026	C06196	ko00230,ko01232
pme1178	284.099	152.059	283.092	C10H13N5O5	[M+H]+	Guanosine	鸟苷	Nucleotides and derivatives	核苷酸及其衍生物	Nucleotides and derivatives	核苷酸及其衍生物	118-00-3	1	707637	2.0935e+06	1.87414e+06	1.97082e+06	C00387	ko00230,ko01100,ko01232,ko02010
Wafn005994	447.225	315.183	448.231	C21H36O10	[M-H]-	Geranyl 6-O-xylopyranosyl-glucopyranoside	香叶基 6-O-吡喃木糖基-吡喃葡萄糖苷	Others	其它类	Others	其它	124044-06-0	2	700695	272335	249976	268856	-	-
pme0008	176.103	113.071	175.096	C6H13N3O3	[M+H]+	L-Citrulline	L-瓜氨酸	Amino acids and derivatives	氨基酸及其衍生物	Amino acids and derivatives	氨基酸及其衍生物	372-75-8	3	693724	616812	642266	664064	C00327	ko00220,ko01100,ko01110,ko01230
Lmbn000198	133.014	71.0139	134.022	C4H6O5	[M-H]-	3-Dehydro-L-Threonic Acid	3-脱氢-L-苏糖酸	Others	其它类	Saccharides	糖类	-	1	681034	1.23197e+06	1.29519e+06	1.4666e+06	C03064	ko00053,ko01100
mws1138	551.151	303.043	550.144	C24H26N2O13	[M+H]+	Betanin (Betanidin-5-O-glucoside)	甜菜红苷 (甜菜苷-5-O-葡萄糖苷)	Alkaloids	生物碱	Plumerane	吲哚类生物碱	7659-95-2	2	665934	1.53315e+07	1.41734e+07	1.375e+07	C08540	ko00965,ko01110
mws2220	457.078	169.013	458.085	C22H18O11	[M-H]-	Gallocatechin 3-O-gallate	没食子儿茶素 3-O-没食子酸酯	Flavonoids	黄酮	Flavanols	黄烷醇类	5127-64-0	1	656983	514573	500618	490975	-	-
mws0264	341.109	119.035	342.116	C12H22O11	[M-H]-	D-Trehalose	D-海藻糖	Others	其它类	Saccharides	糖类	99-20-7	1	651838	1.52544e+06	1.26011e+06	1.22506e+06	C01083	ko00500,ko01100,ko01110,ko02010
mws0359	241.217	241.218	242.225	C15H30O2	[M-H]-	Pentadecanoic Acid	十五烷酸	Lipids	脂质	Free fatty acids	游离脂肪酸	1002-84-2	3	635841	1.98911e+06	1.66852e+06	1.83357e+06	C16537	-
pma0134	121.049	93.0575	120.042	C4H8O4	[M+H]+	D-Threose	D-苏阿糖	Others	其它类	Saccharides	糖类	95-43-2	3	633023	386297	413525	381697	C06463	-
pmn001695	371.098	249.063	372.106	C16H20O10	[M-H]-	Trihydroxycinnamoylquinic acid	三羟基肉桂酰奎宁酸	Phenolic acids	酚酸类	Phenolic acids	酚酸类	-	1	631141	477311	452747	507502	-	-
Zmhn001358	299.077	137.025	300.084	C13H16O8	[M-H]-	4-O-Glucosyl-4-hydroxybenzoic acid*	4-O-葡萄糖基-4-羟基苯甲酸*	Phenolic acids	酚酸类	Phenolic acids	酚酸类	-	1	626975	429327	466855	395477	-	-
pmf0174	157.16	157.16	158.167	C10H22O	[M-H]-	1-Decanol*	1-癸醇*	Others	其它类	Saccharides	糖类	112-30-1	3	621758	1.21901e+06	1.22126e+06	1.22214e+06	C01633	-
pme0519	341.109	119.035	342.116	C12H22O11	[M-H]-	D-Sucrose	D-蔗糖	Others	其它类	Saccharides	糖类	57-50-1	1	582053	1.15706e+06	1.10442e+06	1.16939e+06	C00089	ko00052,ko00500,ko01100,ko01110,ko02010
mws0282	203.083	116.051	204.09	C11H12N2O2	[M-H]-	L-Tryptophan	L-色氨酸	Amino acids and derivatives	氨基酸及其衍生物	Amino acids and derivatives	氨基酸及其衍生物	73-22-3	1	577455	1.00254e+07	1.0148e+07	1.09573e+07	C00078	ko00260,ko00380,ko00400,ko00901,ko00966,ko00970,ko00996,ko01100,ko01110,ko01210,ko01230,ko01240
mws0034	457.078	169.014	458.085	C22H18O11	[M-H]-	Epigallocatechin-3-gallate	表没食子儿茶素-3-没食子酸酯	Flavonoids	黄酮	Flavanols	黄烷醇类	989-51-5	1	574115	423458	382017	407726	C09731	-
mws0367	277.217	277.217	278.225	C18H30O2	[M-H]-	α-Linolenic Acid*	α-亚麻酸*	Lipids	脂质	Free fatty acids	游离脂肪酸	463-40-1	3	566381	2.90403e+07	2.9553e+07	2.95e+07	C06427	ko00592,ko01040,ko01100,ko01110
MWS00330g	116.071	70.0662	115.063	C5H9NO2	[M+H]+	1-Amino-1-cyclobutane-carboxylic-acid	1-氨基-1-环丁烷羧酸	Amino acids and derivatives	氨基酸及其衍生物	Amino acids and derivatives	氨基酸及其衍生物	22264-50-2	1	552863	2.88219e+06	1.9365e+06	2.57457e+06	-	-
pma1751	286.092	124.039	285.085	C12H15NO7	[M+H]+	N-(beta-D-Glucosyl)nicotinate	N-葡萄糖基烟酸	Others	其它类	Vitamin	维生素	-	3	538621	63042.3	56483.6	54505.9	-	-
mws0366	277.217	277.219	278.225	C18H30O2	[M-H]-	γ-Linolenic Acid*	γ-亚麻酸*	Lipids	脂质	Free fatty acids	游离脂肪酸	506-26-3	3	534590	2.90062e+07	2.94521e+07	2.85373e+07	C06426	ko00591,ko01040,ko01100
Lmsn002247	299.077	137.024	300.084	C13H16O8	[M-H]-	1-O-Salicyloyl-β-D-glucose*	1-O-水杨酰-β-D-葡萄糖*	Phenolic acids	酚酸类	Phenolic acids	酚酸类	60517-74-0	1	533328	452153	422116	365203	-	-
Lmyn011997	337.311	337.311	338.318	C22H42O2	[M-H]-	Erucic acid	芥酸	Lipids	脂质	Free fatty acids	游离脂肪酸	112-86-7	2	517640	1.2642e+06	2.03042e+06	1.10188e+06	C08316	ko01040
pme1474	298.097	136.062	297.09	C11H15N5O3S	[M+H]+	5'-Deoxy-5'-(methylthio)adenosine	5-脱氧-5-甲硫腺苷	Nucleotides and derivatives	核苷酸及其衍生物	Nucleotides and derivatives	核苷酸及其衍生物	2457-80-9	1	498463	3.61368e+06	3.67384e+06	3.80385e+06	C00170	ko00270,ko00908,ko01100
pme0006	116.071	70.0651	115.063	C5H9NO2	[M+H]+	L-Proline	L-脯氨酸	Amino acids and derivatives	氨基酸及其衍生物	Amino acids and derivatives	氨基酸及其衍生物	147-85-3	1	478613	4.2294e+06	3.32881e+06	4.35713e+06	C00148	ko00330,ko00332,ko00470,ko00970,ko01100,ko01110,ko01230,ko02010
pmn001610	307.264	307.264	308.272	C20H36O2	[M-H]-	Eicosadienoic acid	二十碳二烯酸	Lipids	脂质	Free fatty acids	游离脂肪酸	5598-38-9	3	472863	5.29337e+06	4.89546e+06	4.57674e+06	C16525	ko01040
pmb0854	518.324	184.073	517.317	C26H48NO7P	[M+H]+	LysoPC 18:3	溶血磷脂酰胆碱 18:3	Lipids	脂质	LPC	溶血磷脂酰胆碱	-	1	459410	5.6283e+06	5.00696e+06	5.29584e+06	-	-
pme3388	189.135	144.102	188.127	C7H16N4O2	[M+H]+	Homoarginine	高精氨酸	Amino acids and derivatives	氨基酸及其衍生物	Amino acids and derivatives	氨基酸及其衍生物	156-86-5	2	457842	130495	149365	134431	C01924	-
pmb0530	664.116	136.062	663.109	C21H27N7O14P2	[M+H]+	Nicotinic acid adenine dinucleotide	烟酸腺嘌呤二核苷酸	Nucleotides and derivatives	核苷酸及其衍生物	Nucleotides and derivatives	核苷酸及其衍生物	53-84-9	2	451222	190239	187162	220706	C00003	ko00190,ko00730,ko00760,ko01100,ko01240
Lmfn004093	435.13	315.088	436.137	C21H24O10	[M-H]-	Phloretin-4'-O-glucoside (Trilobatin)	根皮素-4'-O-葡萄糖苷	Flavonoids	黄酮	Chalcones	查耳酮	4192-90-9	2	449263	51562.1	56230.8	32140.5	-	-
pme3163	289.033	96.9696	290.04	C7H15O10P	[M-H]-	D-Sedoheptuiose 7-phosphate	D-景天庚酮糖 7-磷酸	Others	其它类	Saccharides	糖类	2646-35-7	3	448833	310322	253404	231840	-	-
Lmsn000381	341.109	89.0244	342.116	C12H22O11	[M-H]-	D-Maltose	D-麦芽糖	Others	其它类	Saccharides	糖类	69-79-4	1	439524	1.13833e+06	1.03017e+06	763519	C01971	-
Lmhp008589	476.277	335.258	475.27	C23H42NO7P	[M+H]+	LysoPE 18:3(2n isomer)	溶血磷脂酰乙醇胺 18:3(2n异构)	Lipids	脂质	LPE	溶血磷脂酰乙醇胺	-	1	430731	2.69006e+06	2.81306e+06	2.8038e+06	-	-
pme1014	445.31	341.284	444.303	C31H40O2	[M+H]+	Menatetrenone (Vitamin K2)	四烯甲萘醌 (维生素 K2)	Others	其它类	Vitamin	维生素	11032-49-8	3	426321	217942	201797	210030	-	-
pmb0865	518.324	184.073	517.317	C26H48NO7P	[M+H]+	LysoPC 18:3(2n isomer)	溶血磷脂酰胆碱 18:3(2n异构)	Lipids	脂质	LPC	溶血磷脂酰胆碱	-	1	425968	4.12346e+06	4.21353e+06	3.90829e+06	-	-
pme3337	384.115	252.073	383.108	C14H17N5O8	[M+H]+	Succinyladenosine	琥珀酰腺苷	Nucleotides and derivatives	核苷酸及其衍生物	Nucleotides and derivatives	核苷酸及其衍生物	4542-23-8	2	423026	2.01974e+06	2.15884e+06	1.88567e+06	-	-
Wmyn000217	331.103	169.014	332.111	C14H20O9	[M-H]-	2,6-dimethoxy-hydroquinone-4-O-β-D-glucopyranoside	2,6-二甲氧基对苯二酚 4-O-β-D-吡喃葡萄糖苷	Phenolic acids	酚酸类	Phenolic acids	酚酸类	-	1	422352	3.59771e+06	3.64988e+06	3.46272e+06	-	-
mws5038	341.109	89.0249	342.116	C12H22O11	[M-H]-	Isomaltulose	异麦芽酮糖	Others	其它类	Saccharides	糖类	13718-94-0	1	421671	860651	925366	857995	C01742	-
MWStz040	116.07	70.0668	115.063	C5H9NO2	[M+H]+	Pterolactam	蕨内酰胺	Alkaloids	生物碱	Pyrrole alkaloids	吡咯类生物碱	38072-88-7	1	414614	3.67817e+06	2.96655e+06	4.26653e+06	-	-
Jmwn002620	341.086	161.02	342.095	C15H18O9	[M-H]-	Vanillic Acid-4-O-Glucuronide	香草酸-4-O-葡萄糖醛酸苷	Phenolic acids	酚酸类	Phenolic acids	酚酸类	-	2	402734	2.02781e+06	1.95989e+06	2.08909e+06	-	-
zjgp122326	286.092	124.039	285.085	C12H15NO7	[M+H]+	Pyridine-4-formyl-O-β-D-glucopyranoside	吡啶-4-甲酰-O-β-D-吡喃葡萄糖酯苷	Others	其它类	Others	其它	-	2	387051	53797.2	34885.6	61494.6	-	-
Lmqn008024	520.269	152.996	521.275	C24H44NO9P	[M-H]-	PS(18:2)	磷脂酰丝氨酸(18:2)	Lipids	脂质	Glycerol ester	甘油酯	-	3	365202	877916	843718	897390	-	-
Wmmp000162	183.03	124.023	184.037	C8H8O5	[M-H]-	5-hydroxyisovanillic acid	5-羟基异香草酸	Phenolic acids	酚酸类	Phenolic acids	酚酸类	-	1	362315	1.33345e+06	1.50186e+06	1.33654e+06	-	-
Zasn010461	269.249	269.249	270.256	C17H34O2	[M-H]-	Pentadecanoic acid,14-methyl-,methyl ester	14-甲基十五烷酸甲酯	Others	其它类	Others	其它	5129-60-2	1	358870	3.5785e+06	3.46609e+06	3.06291e+06	-	-
Zbyn004323	575.102	423.091	576.11	C26H24O15	[M-H]-	2,6-di-O-galloylarbutin	2,6-O-二没食子酰熊果苷	Lignans and Coumarins	木脂素和香豆素	Coumarins	香豆素	-	1	352376	193092	115039	142954	-	-
Hmjp005089	330.132	177.05	329.126	C18H19NO5	[M+H]+	(2Z)-N-[2-(3,4-Dihydroxyphenyl)-2-hydroxyethyl]-3-(4-methoxyphenyl)-2-propenamide	(2Z)-N-[2-(3,4-二羟基苯基)-2-羟乙基]-3-(4-甲氧基苯基)-2-丙烯酰胺	Alkaloids	生物碱	Phenolamine	酚胺	-	2	343634	48480.2	36190.5	43309.5	-	-
Hmbp001276	169.05	65.03	168.042	C8H8O4	[M+H]+	Gallacetophenone	没食子苯乙酮	Phenolic acids	酚酸类	Phenolic acids	酚酸类	528-21-2	2	342094	84958.2	87047.2	73799.2	-	-
Zmgn005057	297.243	183.012	298.251	C18H34O3	[M-H]-	9,10-Epoxyoctadecanoic Acid	9,10-环氧十八烷酸	Lipids	脂质	Free fatty acids	游离脂肪酸	2443-39-2	2	340599	516128	498901	471027	C19418	ko00073
pmb1096	118.065	91.0542	117.058	C8H7N	[M+H]+	Indole	吲哚	Alkaloids	生物碱	Plumerane	吲哚类生物碱	120-72-9	2	337245	2.04207e+06	1.88951e+06	1.73386e+06	C00463	ko00380,ko00400,ko00402,ko01100,ko01110
pmb0881	478.293	337.274	477.286	C23H44NO7P	[M+H]+	LysoPE 18:2	溶血磷脂酰乙醇胺 18:2	Lipids	脂质	LPE	溶血磷脂酰乙醇胺	-	2	336748	1.12177e+06	1.02502e+06	1.06544e+06	-	-
mws0192	117.019	73.0295	118.027	C4H6O4	[M-H]-	Succinic acid	琥珀酸	Organic acids	有机酸	Organic acids	有机酸	110-15-6	1	331280	1.69947e+06	1.74217e+06	1.72794e+06	C00042	ko00020,ko00190,ko00250,ko00310,ko00350,ko00360,ko00620,ko00630,ko00640,ko00650,ko00760,ko00920,ko01100,ko01110,ko01200
MWSslk106	122.096	105.071	121.089	C8H11N	[M+H]+	2-Phenylethylamine	2-苯乙胺	Alkaloids	生物碱	Benzylphenylethylamine alkaloids	苄基苯乙胺类生物碱	156-28-5	1	330158	816565	740351	725529	C05332	ko00360,ko01100
Zbdn001947	301.092	123.009	302.1	C13H18O8	[M-H]-	Isotachioside	异它乔糖苷	Phenolic acids	酚酸类	Phenolic acids	酚酸类	31427-08-4	1	327381	414775	357399	394684	-	-
Lmsn002548	341.088	161.025	342.095	C15H18O9	[M-H]-	1-O-Caffeoyl-β-D-glucose	1-O-咖啡酰-β-D-葡萄糖	Phenolic acids	酚酸类	Phenolic acids	酚酸类	14364-08-0	2	324397	1.83843e+06	1.59956e+06	1.68904e+06	C10433	-
Wacn005438	477.269	161.045	418.257	C21H38O8	[M+CH3COOH-H]-	Hydroxypentadecenoic acid glucoside	羟基十五碳烯酸葡萄糖苷	Lipids	脂质	Free fatty acids	游离脂肪酸	-	1	315845	173981	168362	86349.8	-	-
mws2608	222.097	84.0451	221.09	C8H15NO6	[M+H]+	N-Acetyl-D-galactosamine	N-乙酰-D-半乳糖胺	Others	其它类	Saccharides	糖类	1811-31-0	3	310726	277571	267021	247752	C01132	ko00052,ko00520,ko01100,ko01250
Zbdn002066	301.092	123.009	302.1	C13H18O8	[M-H]-	Tachioside	它乔糖苷	Phenolic acids	酚酸类	Phenolic acids	酚酸类	109194-60-7	1	307837	295800	280289	255050	-	-
pmb2826	147.03	87.0081	148.037	C5H8O5	[M-H]-	L-Citramalic acid	2-甲基苹果酸	Organic acids	有机酸	Organic acids	有机酸	6236-09-5	1	304604	72626.8	56290.3	72677.9	C02614	ko00660,ko01100
Lssp210056	465.103	303.05	464.096	C21H20O12	[M+H]+	Quercetin3-O-galactoside	槲皮素-3-O-半乳糖苷	Flavonoids	黄酮	Other Flavonoids	其它类黄酮	-	1	303019	2.97334e+06	2.72232e+06	3.28161e+06	-	-
Zmzn000113	146.047	102.056	147.053	C5H9NO4	[M-H]-	L-threo-3-Methylaspartate	L-苏式-3-甲基天冬氨酸	Amino acids and derivatives	氨基酸及其衍生物	Amino acids and derivatives	氨基酸及其衍生物	6061-13-8	1	292158	93231.4	86889.7	89951.9	C03618	ko00630,ko00660,ko01100,ko01200
Jmgn004021	449.109	269.05	450.116	C21H22O11	[M-H]-	6-C-Glucosyl-2-Hydroxynaringenin	6-碳葡萄糖基-2-羟基柚皮素	Flavonoids	黄酮	Flavanones	二氢黄酮	-	2	283404	671351	744637	828391	-	-
Zajn002491	451.125	289.072	452.132	C21H24O11	[M-H]-	catechin-4-β-D-galactopyranoside	儿茶素-4-β-D-吡喃半乳糖苷	Flavonoids	黄酮	Flavanols	黄烷醇类	-	1	282017	390961	371360	371628	-	-
MWSmce675	271.083	108.022	272.09	C12H16O7	[M-H]-	Arbutin	熊果苷	Phenolic acids	酚酸类	Phenolic acids	酚酸类	497-76-7	1	271091	184481	170864	174882	C06186	ko00010
Lmtn002796	449.108	287.057	450.116	C21H22O11	[M-H]-	Aromadendrin-7-O-glucoside	香橙素-7-O-葡萄糖苷	Flavonoids	黄酮	Flavanonols	二氢黄酮醇	28189-90-4	2	269005	830354	925341	767538	-	-
mws2104	193.072	59.0139	194.079	C7H14O6	[M-H]-	D-Pinitol	D-松醇	Others	其它类	Saccharides	糖类	10284-63-6	3	267295	257091	132527	142389	C03844	-
HJN041	451.124	289.072	452.132	C21H24O11	[M-H]-	Epicatechin glucoside	表儿茶素苷	Flavonoids	黄酮	Flavanols	黄烷醇类	-	2	266857	266243	185430	327016	-	-
Lmcp002302	312.13	180.088	311.123	C12H17N5O5	[M+H]+	N6-(2-Hydroxyethyl)adenosine	N6-(2-羟乙基)腺苷	Nucleotides and derivatives	核苷酸及其衍生物	Nucleotides and derivatives	核苷酸及其衍生物	4338-48-1	2	265018	470999	380140	416660	-	-
pme3967	312.13	180.088	311.123	C12H17N5O5	[M+H]+	2-(Dimethylamino)guanosine	2-(二甲基氨基)鸟苷	Nucleotides and derivatives	核苷酸及其衍生物	Nucleotides and derivatives	核苷酸及其衍生物	2140-67-2	1	262340	391110	366415	382488	-	-
Lmhn102068	295.046	179.035	296.053	C13H12O8	[M-H]-	2-O-Caffeoylmalic acid	2-O-咖啡酰苹果酸	Phenolic acids	酚酸类	Phenolic acids	酚酸类	53755-04-7	2	261607	149618	145636	156591	-	-
pme0122	189.123	126.091	188.116	C8H16N2O3	[M+H]+	N6-Acetyl-L-lysine	N6-乙酰-L-赖氨酸	Amino acids and derivatives	氨基酸及其衍生物	Amino acids and derivatives	氨基酸及其衍生物	692-04-6	3	258294	235230	230058	251933	C02727	ko00310,ko01100
Ymjm000152	271.081	108.021	272.09	C12H16O7	[M-H]-	p-Hydroxypheny-β-D-allopyranoside	对羟基苯-β-D-别吡喃糖苷	Phenolic acids	酚酸类	Phenolic acids	酚酸类	-	1	249556	184883	180024	187538	-	-
pmd0147	548.371	184.073	547.364	C28H54NO7P	[M+H]+	LysoPC 20:2	溶血磷脂酰胆碱 20:2	Lipids	脂质	LPC	溶血磷脂酰胆碱	-	3	249232	113692	105938	100537	-	-
pmb2221	318.3	60.0444	317.293	C18H39NO3	[M+H]+	4-Hydroxysphinganine	4-羟基鞘氨醇	Lipids	脂质	Sphingolipids	鞘脂	554-62-1	2	246521	569040	555835	463571	C12144	ko00600,ko01100
Lmsn003023	635.089	169.014	636.096	C27H24O18	[M-H]-	1,3,6-Tri-O-galloyl-β-D-glucose	1,3,6-三-O-没食子酰-β-D-葡萄糖	Phenolic acids	酚酸类	Phenolic acids	酚酸类	18483-17-5	1	240244	236418	197128	164812	C17458	-
pmn001519	335.041	124	336.048	C15H12O9	[M-H]-	Galloyl Methyl gallate	没食子酰没食子酸甲酯	Phenolic acids	酚酸类	Phenolic acids	酚酸类	-	1	239906	2.93152e+06	2.60044e+06	2.75954e+06	-	-
mws0289	480.308	339.289	479.301	C23H46NO7P	[M+H]+	LysoPE 18:1	溶血磷脂酰乙醇胺 18:1	Lipids	脂质	LPE	溶血磷脂酰乙醇胺	89576-29-4	3	239185	183629	208194	186540	-	-
Lmqn008288	299.259	299.256	300.266	C18H36O3	[M-H]-	3-Hydroxyoctadecanoic Acid	3-羟基十八烷酸	Lipids	脂质	Free fatty acids	游离脂肪酸	45261-96-9	2	238554	408020	430512	382523	-	-
Zmzp000145	189.16	84.0803	188.153	C9H20N2O2	[M+H]+	Trimethyllysine	三甲基赖氨酸	Amino acids and derivatives	氨基酸及其衍生物	Amino acids and derivatives	氨基酸及其衍生物	23284-33-5	3	237296	199887	176804	183256	C03793	ko00310,ko01100
Zbzn008048	293.176	221.153	294.183	C17H26O4	[M-H]-	Embelin	酸藤子酚	Quinones	醌类	Quinones	醌类	550-24-3	1	237048	1.36309e+06	1.2712e+06	1.24362e+06	-	-
Lmyp003349	617.114	153.018	616.106	C28H24O16	[M+H]+	Quercetin-3-O-(6''-O-galloyl)glucoside	槲皮素-3-O-(6''-O-没食子酰)葡萄糖苷	Flavonoids	黄酮	Flavonols	黄酮醇	56316-75-7	2	229509	8.01254e+06	7.82805e+06	7.06583e+06	-	-
pme1654	209.119	59.0151	210.126	C12H18O3	[M-H]-	Jasmonic acid	茉莉酸	Organic acids	有机酸	Organic acids	有机酸	77026-92-7	3	228768	430575	443822	493257	C08491	ko00592,ko01100,ko01110,ko04075
Lmdp003286	465.102	303.061	464.096	C21H20O12	[M+H]+	Isohyperoside	异金丝桃苷	Flavonoids	黄酮	Flavonols	黄酮醇	35589-21-0	2	217183	2.38085e+06	2.90614e+06	2.82211e+06	-	-
Lmhn004030	289.072	151.04	290.079	C15H14O6	[M-H]-	5,7,3',4',5'-Pentahydroxyflavan (Tricetiflavan)	5,7,3',4',5'-五羟基黄烷 (特利色黄烷)	Flavonoids	黄酮	Flavanols	黄烷醇类	-	2	216375	167158	137040	125861	-	-
pmb0818	206.081	145.052	205.074	C11H11NO3	[M+H]+	Methoxyindoleacetic acid	甲氧基吲哚乙酸	Alkaloids	生物碱	Plumerane	吲哚类生物碱	3471-31-6	3	214795	1.18515e+06	1.11608e+06	1.135e+06	C05660	ko00380
pme2165	155.01	111.02	156.017	C5H4N2O4	[M-H]-	Orotic acid (Vitamin B13)	乳清酸 (维生素 B13)	Others	其它类	Vitamin	维生素	65-86-1	3	209609	265491	261006	242328	C00295	ko00240,ko01100,ko01240
pme0257	111.02	67.0302	112.027	C4H4N2O2	[M-H]-	Uracil	尿嘧啶	Nucleotides and derivatives	核苷酸及其衍生物	Nucleotides and derivatives	核苷酸及其衍生物	66-22-8	3	201677	93485.2	135325	92102.2	C00106	ko00240,ko00410,ko00770,ko01100,ko01232
mws1434	431.098	311.05	432.106	C21H20O10	[M-H]-	Apigenin-6-C-glucoside (Isovitexin)	芹菜素-6-C-葡萄糖苷 (异牡荆素)	Flavonoids	黄酮	Flavones	黄酮	38953-85-4	1	201608	71085.7	65995.6	69940.5	C01714	ko00944
Zasn010433	307.264	307.264	308.272	C20H36O2	[M-H]-	9,12-Octadecadienoic acid,ethyl ester	9,12-亚油酸乙酯	Others	其它类	Others	其它	6114-21-2	2	200180	2.20649e+06	2.12202e+06	1.78622e+06	-	-
Lmzn006582	469.336	469.34	470.34	C30H46O4	[M-H]-	2-Formyl-3-hydroxy-A(1)-norlup-20(29)-en-28-oic acid (Colubrinic acid)	2-甲酰-3-羟基-A(1)-去甲基羽扇豆-20(29)-烯-28-酸 (Colubrinic acid)	Terpenoids	萜类	Triterpene	三萜	-	2	197522	301385	234412	271915	-	-
Zahp013728	338.342	338.341	337.334	C22H43NO	[M+H]+	octadecanoic acid pyrrolidide	十八烷酸吡咯烷	Alkaloids	生物碱	Alkaloids	生物碱	33707-76-5	2	197464	919203	776799	882725	-	-
pme0516	179.056	87.0072	180.063	C6H12O6	[M-H]-	Inositol	肌醇	Others	其它类	Saccharides	糖类	87-89-8	1	194698	784473	810474	730569	C00137	ko00052,ko00053,ko00562,ko01100,ko01110,ko01250,ko02010,ko04070
Hmcn000192	209.067	59.0139	210.074	C7H14O7	[M-H]-	Sedoheptulose	景天庚酮糖	Others	其它类	Saccharides	糖类	3019-74-7	2	192320	113630	168140	154682	C02076	ko00710,ko01100
pme1002	138.091	103.054	137.084	C8H11NO	[M+H]+	L-Tyramine	L-酪胺	Alkaloids	生物碱	Alkaloids	生物碱	51-67-2	1	192006	84431.2	98633.6	50547.9	C00483	ko00350,ko00950,ko01100,ko01110,ko01240
Lmsp004166	611.161	303.052	610.153	C27H30O16	[M+H]+	Quercetin-3-O-glucoside-7-O-rhamnoside*	槲皮素-3-O-葡萄糖苷-7-O-鼠李糖苷*	Flavonoids	黄酮	Flavonols	黄酮醇	-	1	191964	6.16058e+06	7.00764e+06	6.90339e+06	-	-
Lmmp003091	611.16	303.05	610.153	C27H30O16	[M+H]+	Quercetin-3-O-(4''-O-glucosyl)rhamnoside*	槲皮素-3-O-(4''-O-葡萄糖基)鼠李糖苷*	Flavonoids	黄酮	Flavonols	黄酮醇	59262-54-3	1	191294	7.67041e+06	5.19691e+06	5.75033e+06	C17563	-
MWSmce549	303.252	57.0702	302.246	C17H34O4	[M+H]+	1-Monomyristin	1-肉豆蔻酸单甘油酯	Lipids	脂质	Free fatty acids	游离脂肪酸	589-68-4	3	189324	104027	96534.7	101599	-	-
Lmmn003323	271.228	225.22	272.235	C16H32O3	[M-H]-	2-Hydroxyhexadecanoic acid	2-羟基十六烷酸	Organic acids	有机酸	Organic acids	有机酸	764-67-0	1	186162	8.10039e+06	7.50188e+06	7.76244e+06	-	-
Hmcp009963	180.137	123.07	180.138	C11H18NO+	[M]+	Candicine	N-甲基大麦芽碱	Alkaloids	生物碱	Phenolamine	酚胺	6656-13-9	2	182983	85032.2	81249.6	73513.4	C10575	-
MWSmce165	165.082	59.0159	166.084	C6H14O5	[M-H]-	L-Fucitol	L-岩藻糖醇	Others	其它类	Saccharides	糖类	13074-06-1	2	182057	115462	109415	109415	-	-
pmn001513	321.025	125.023	322.033	C14H10O9	[M-H]-	Digallic Acid	双没食子酸	Phenolic acids	酚酸类	Phenolic acids	酚酸类	536-08-3	2	181712	550617	611460	599676	C01572	-
Lmhp008833	494.324	184.073	493.317	C24H48NO7P	[M+H]+	LysoPC 16:1(2n isomer)	溶血磷脂酰胆碱 16:1(2n异构)	Lipids	脂质	LPC	溶血磷脂酰胆碱	-	2	180202	342255	309513	317442	-	-
Lmsn003778	493.099	169.014	494.106	C22H22O13	[M-H]-	1-O-Caffeoyl-4-O-galloyl-β-D-glucose	1-O-咖啡酰-4-O-没食子酰-β-D-葡萄糖	Phenolic acids	酚酸类	Phenolic acids	酚酸类	-	2	179993	157024	134830	185811	-	-
mws0256	118.086	72.0808	117.079	C5H11NO2	[M+H]+	L-Valine	L-缬氨酸	Amino acids and derivatives	氨基酸及其衍生物	Amino acids and derivatives	氨基酸及其衍生物	72-18-4	1	178285	2.27868e+06	2.074e+06	2.12107e+06	C00183	ko00280,ko00290,ko00311,ko00460,ko00770,ko00966,ko00970,ko01100,ko01110,ko01210,ko01230,ko01240,ko02010
pmp000579	463.123	301.07	462.116	C22H22O11	[M+H]+	Diosmetin-7-O-galactoside*	香叶木素-7-O-半乳糖苷*	Flavonoids	黄酮	Flavones	黄酮	-	1	175042	2.79349e+06	2.20004e+06	2.16052e+06	-	-
Lmdp003110	289.071	243.065	288.063	C15H12O6	[M+H]+	2,6,7,4'-Tetrahydroxyisoflavanone	2,6,7,4'-四羟基异黄烷酮	Flavonoids	黄酮	Dihydroisoflavones	二氢异黄酮	-	1	172878	157382	103314	139967	C16233	ko00943,ko01110
Hmmp004965	463.124	301.07	462.116	C22H22O11	[M+H]+	Diosmetin-7-O-glucoside*	香叶木素-7-O-葡萄糖苷*	Flavonoids	黄酮	Flavones	黄酮	20126-59-4	1	171808	2.98962e+06	2.00596e+06	1.99682e+06	-	-
pma6455	229.012	96.9696	230.019	C5H11O8P	[M-H]-	Ribulose-5-phosphate	核酮糖-5-磷酸	Others	其它类	Saccharides	糖类	4300-28-1	3	168759	56789.9	54442	52660.4	C00117	ko00030,ko00230,ko00440,ko00710,ko00750,ko01100,ko01110,ko01200,ko01230,ko01240
Zmyn000230	147.029	57.0344	148.037	C5H8O5	[M-H]-	2-Dehydro-3-deoxy-L-arabinonate	2-脱氢-3-脱氧-L-阿拉伯糖	Others	其它类	Saccharides	糖类	-	1	165189	140366	190049	208101	C00684	ko00053,ko01100
mws1333	341.109	113.022	342.116	C12H22O11	[M-H]-	Melibiose	蜜二糖	Others	其它类	Saccharides	糖类	585-99-9	1	164706	416452	511173	446053	C05402	ko00052,ko01100,ko02010
pmb0711	611.161	303.05	610.153	C27H30O16	[M+H]+	Quercetin-7-O-rutinoside*	槲皮素-7-O-芸香糖苷*	Flavonoids	黄酮	Flavonols	黄酮醇	147714-62-3	1	164410	5.77509e+06	5.74371e+06	5.89676e+06	-	-
Wmmp000174	939.114	769.089	940.118	C41H32O26	[M-H]-	1,2,3,4,6-penta-galloyl-glucose	1,2,3,4,6-五加仑基葡萄糖	Tannins	鞣质	Tannin	鞣质	-	1	164209	259102	174403	198533	-	-
pma3101	256.082	124.039	256.082	C11H14NO6+	[M]+	Nicotinate D-ribonucleoside	烟酸核糖核苷	Others	其它类	Vitamin	维生素	17720-18-2	3	164022	2.20216e+06	1.87576e+06	2.36568e+06	C05841	ko00760,ko01100
pmb0789	332.134	152.072	331.127	C14H21NO8	[M+H]+	Pyridoxine-5'-O-glucoside	吡哆醇-5'-O-葡萄糖苷	Others	其它类	Vitamin	维生素	-	3	162591	234198	233041	241506	C03996	-
mws0752	185.155	185.156	186.162	C11H22O2	[M-H]-	Undecylic Acid	十一烷酸	Lipids	脂质	Free fatty acids	游离脂肪酸	112-37-8	2	161976	320849	322729	322965	C17715	-
Zblp002750	181.086	121.064	180.079	C10H12O3	[M+H]+	Methyl-3-(3-hydroxyphenyl)Propionate	3-(3-羟基苯基)丙酸甲酯	Phenolic acids	酚酸类	Phenolic acids	酚酸类	61389-68-2	2	161651	127580	116769	121093	-	-
pme3186	168.991	78.9591	169.998	C3H7O6P	[M-H]-	DL-Glyceraldehyde-3-phosphate	DL-甘油醛-3-磷酸	Organic acids	有机酸	Organic acids	有机酸	591-59-3	3	158974	17394.8	16749.7	15938	C00661	-
MWS2430	241.218	241.211	242.225	C15H30O2	[M-H]-	13-methylmyristic acid	13-甲基十四烷酸	Lipids	脂质	Free fatty acids	游离脂肪酸	2485-71-4	1	158721	1.04548e+06	1.01903e+06	987669	-	-
pmb2654	460.146	117.9	461.153	C19H27NO12	[M-H]-	Anthranilate-1-O-Sophoroside	邻氨基苯甲酸-1-O-槐糖苷	Phenolic acids	酚酸类	Phenolic acids	酚酸类	-	3	157244	695569	461462	404533	-	-
Hmln002199	505.101	300.033	506.106	C23H22O13	[M-H]-	Quercetin-3-O-(6''-O-acetyl)galactoside	槲皮素-3-O-(6''-O-乙酰)半乳糖苷	Flavonoids	黄酮	Flavonols	黄酮醇	-	1	154083	2.2887e+06	2.49776e+06	1.71511e+06	-	-
Lmjp003655	463.123	301.078	462.116	C22H22O11	[M+H]+	6-C-MethylKaempferol-3-glucoside	6-甲基山柰酚-3-O-葡萄糖苷	Flavonoids	黄酮	Flavones	黄酮	-	1	153433	2.5686e+06	2.11958e+06	2.41592e+06	-	-
MWS1882	132.03	88.0403	133.037	C4H7NO4	[M-H]-	Iminodiacetic acid	亚氨基二乙酸	Organic acids	有机酸	Organic acids	有机酸	142-73-4	1	153421	93962.7	107397	92617	C19911	-
MWSmce333	284.099	152.056	283.092	C10H13N5O5	[M+H]+	Crotonoside; 2-Hydroxyadenosine	巴豆苷; 2-羟基腺苷	Nucleotides and derivatives	核苷酸及其衍生物	Nucleotides and derivatives	核苷酸及其衍生物	1818-71-9	3	151785	489712	379824	452837	C08432	-
pmb3107	359.098	182.022	360.106	C15H20O10	[M-H]-	Glucosyringic Acid	葡萄糖基丁香酸	Phenolic acids	酚酸类	Phenolic acids	酚酸类	-	3	151325	1.73622e+06	1.59704e+06	1.47478e+06	-	-
pme0033	137.046	119.035	136.038	C5H4N4O	[M+H]+	Hypoxanthine	次黄嘌呤	Nucleotides and derivatives	核苷酸及其衍生物	Nucleotides and derivatives	核苷酸及其衍生物	68-94-0	3	149052	312367	309066	321134	C00262	ko00230,ko01100,ko01232
MWSslk002	433.113	271.064	432.106	C21H20O10	[M+H]+	Sophoricoside	槐角苷	Flavonoids	黄酮	Isoflavones	异黄酮	152-95-4	1	148637	6.1649e+06	5.3472e+06	5.37955e+06	-	-
Lczn000080	939.114	769.098	940.118	C41H32O26	[M-H]-	1,2,3,4,6-Penta-O-galloyl-β-D-glucose	1,2,3,4,6-五-O-没食子酰-β-D-葡萄糖	Phenolic acids	酚酸类	Phenolic acids	酚酸类	14937-32-7	1	145960	240467	202032	162254	C04576	ko00999
MWSmce585	104.071	59.0145	103.063	C4H9NO2	[M+H]+	Methyl 3-aminopropanoate	3-氨基丙酸甲酯	Amino acids and derivatives	氨基酸及其衍生物	Amino acids and derivatives	氨基酸及其衍生物	4138-35-6	2	145454	418282	427081	391923	-	-
pmb0889	279.232	95.0855	278.225	C18H30O2	[M+H]+	Punicic acid (9Z,11E,13Z-octadecatrienoic acid)	石榴酸 (9Z,11E,13Z-十八碳三烯酸)	Lipids	脂质	Free fatty acids	游离脂肪酸	544-72-9	3	143973	1.54238e+06	1.50809e+06	1.40717e+06	C08364	-
Qmkp093004	146.06	91.0538	145.053	C9H7NO	[M+H]+	Indole-3-carboxaldehyde	吲哚-3-甲醛	Alkaloids	生物碱	Plumerane	吲哚类生物碱	487-89-8	1	142985	1.82282e+06	1.75104e+06	1.64647e+06	C08493	-
MWSHY0067	611.158	303.051	610.153	C27H30O16	[M+H]+	Quercetin-3-O-rutinoside (Rutin)*	槲皮素-3-O-芸香糖苷 (芦丁)*	Flavonoids	黄酮	Flavonols	黄酮醇	153-18-4	1	142696	5.7891e+06	6.27778e+06	6.32694e+06	C05625	ko00944,ko01100,ko01110
Ymjm000135	507.185	161.024	508.195	C25H32O11	[M-H]-	8R-Dihydrodehydrodiconferyl alcohol 4-O-β-D-glucopyranoside	8R-二氢脱氢二萜醇 4-O-β-D-吡喃葡萄糖苷	Lignans and Coumarins	木脂素和香豆素	Lignans	木脂素	-	2	140728	545425	470467	301318	-	-
Lmmn001294	331.103	153.02	332.111	C14H20O9	[M-H]-	Koaburaside	3,5-二甲氧基-4-羟基苯酚-1-O-葡萄糖苷	Phenolic acids	酚酸类	Phenolic acids	酚酸类	41653-73-0	1	140517	869179	859032	781086	-	-
pme3017	104.071	58.0651	103.063	C4H9NO2	[M+H]+	2-Aminoisobutyric acid	2-氨基异丁酸	Organic acids	有机酸	Organic acids	有机酸	62-57-7	2	136828	243720	200354	219562	C03665	-
mws1299	449.108	299.055	448.101	C21H20O11	[M+H]+	Luteolin-8-C-glucoside (Orientin)*	木犀草素-8-C-葡萄糖苷 (荭草素)*	Flavonoids	黄酮	Flavones	黄酮	28608-75-5	2	136592	96791.7	87228.7	105068	C10114	-
pmp001284	331.284	313.273	330.277	C19H38O4	[M+H]+	Monopalmitin	单棕榈酸甘油酯	Lipids	脂质	Glycerol ester	甘油酯	542-44-9	1	136458	164295	170239	185172	-	-
pme0075	188.056	128.035	189.064	C7H11NO5	[M-H]-	N-Acetyl-L-glutamic acid	N-乙酰-L-谷氨酸	Amino acids and derivatives	氨基酸及其衍生物	Amino acids and derivatives	氨基酸及其衍生物	1188-37-0	3	133111	35319.1	55004.7	56235.5	C00624	ko00220,ko01100,ko01110,ko01210,ko01230
pmb3023	449.109	287.055	450.116	C21H22O11	[M-H]-	Eriodictyol-8-C-glucoside	圣草酚-8-C-葡萄糖苷	Flavonoids	黄酮	Flavanones	二氢黄酮	1023271-51-3	3	132869	441026	403075	435791	-	-
Cmyp002064	463.125	301.078	462.116	C22H22O11	[M+H]+	Yuanhuanin	芫花叶苷	Flavonoids	黄酮	Flavones	黄酮	83133-14-6	2	131858	1.87379e+06	1.64683e+06	1.96225e+06	-	-
pme3033	104.071	58.0651	103.063	C4H9NO2	[M+H]+	N,N-Dimethylglycine	N,N-二甲基甘氨酸	Amino acids and derivatives	氨基酸及其衍生物	Amino acids and derivatives	氨基酸及其衍生物	1118-68-9	2	131830	341802	245125	256503	C01026	ko00260,ko01100
Zmzn000079	199.002	78.9585	200.009	C4H9O7P	[M-H]-	D-Erythrose-4-phosphate	D-赤藓糖-4-磷酸	Others	其它类	Saccharides	糖类	585-18-2	3	131402	37603.6	33691.3	48498	C00279	ko00030,ko00400,ko00710,ko00750,ko01100,ko01110,ko01200,ko01230,ko01240
pmb2507	213.017	96.9696	214.024	C5H11O7P	[M-H]-	2-Deoxyribose-1-phosphate	2-脱氧核糖-1-磷酸	Nucleotides and derivatives	核苷酸及其衍生物	Nucleotides and derivatives	核苷酸及其衍生物	17210-42-3	3	131256	880716	679369	671684	C00672	ko00030,ko00240,ko01100
pme0278	191.103	128.071	190.095	C7H14N2O4	[M+H]+	2,6-Diaminooimelic acid	2,6-二氨基庚二酸	Organic acids	有机酸	Organic acids	有机酸	583-93-7	3	130231	107019	100644	99931.3	C00666	ko00300,ko00470,ko01100,ko01110,ko01230
pme2550	173.009	129.019	174.016	C6H6O6	[M-H]-	Cis-Aconitic acid	顺式乌头酸	Organic acids	有机酸	Organic acids	有机酸	585-84-2	3	128998	449709	433864	426857	C00417	ko00020,ko00630,ko00660,ko01100,ko01110,ko01210
Lmln010063	205.158	189.129	206.167	C14H22O	[M-H]-	2,6-Di-tert-butylphenol*	2,6-二叔丁基苯酚*	Phenolic acids	酚酸类	Phenolic acids	酚酸类	128-39-2	1	127913	77755.5	78688.1	72151	-	-
Zmfn000481	535.037	323.026	536.044	C14H22N2O16P2	[M-H]-	Uridine-5'-Diphosphate-D-Xylose	尿苷-5'-二磷酸-D-木糖	Nucleotides and derivatives	核苷酸及其衍生物	Nucleotides and derivatives	核苷酸及其衍生物	3616-06-6	3	127433	54572.3	45290.7	44404	C00190	ko00520,ko00908,ko01100,ko01250
Jmwn002117	331.103	153.02	332.111	C14H20O9	[M-H]-	2-(3,4-dihydroxyphenyl)ethanediol 1-O-β-D-glucopyranoside	2-(3,4-二羟苯基)乙二醇-1-O-β-D-吡喃葡萄糖苷	Phenolic acids	酚酸类	Phenolic acids	酚酸类	-	1	122302	746727	864287	751631	-	-
pmp001073	168.102	150.092	167.095	C9H13NO2	[M+H]+	Synephrine; 4-[1-Hydroxy-2-(methylamino)ethyl]phenol	辛弗林; 4-[1-羟基-2-(甲基氨基)乙基]苯酚	Alkaloids	生物碱	Phenolamine	酚胺	94-07-5	2	120542	237911	290484	266252	C04548	-
MWS5164	203.15	70.0653	202.143	C8H18N4O2	[M+H]+	N,N'-Dimethylarginine;SDMA*	N,N'-二甲基精氨酸*	Amino acids and derivatives	氨基酸及其衍生物	Amino acids and derivatives	氨基酸及其衍生物	30344-00-4	3	119743	159731	160469	169881	-	-
pme1439	165.055	119.049	164.047	C9H8O3	[M+H]+	p-Coumaric acid	对香豆酸	Phenolic acids	酚酸类	Phenolic acids	酚酸类	501-98-4	1	119526	155318	162439	130554	C00811	ko00130,ko00350,ko00940,ko00950,ko01100,ko01110
pme0490	124.039	78.0347	123.032	C6H5NO2	[M+H]+	Nicotinic acid (Vitamin B3)	烟酸 (维生素 B3)	Others	其它类	Vitamin	维生素	59-67-6	2	117324	372404	377979	299338	C00253	ko00760,ko00960,ko01100,ko01110,ko01240
Hmdp001663	637.103	153.01	636.096	C27H24O18	[M+H]+	1,2,6-Tri-O-galloyl-β-D-glucose	1,2,6-三-O-没食子酰-β-D-葡萄糖	Phenolic acids	酚酸类	Phenolic acids	酚酸类	79886-49-0	3	112000	116945	75825.7	123794	C04360	-
Cmyp005063	425.176	147.044	424.173	C21H28O9	[M+H]+	Grandidentatin	大齿杨苷	Phenolic acids	酚酸类	Phenolic acids	酚酸类	15732-48-6	2	111763	57518.2	59725.8	30208.5	C10463	-
Lmyn012331	281.249	281.249	282.256	C18H34O2	[M-H]-	Petroselinic acid	岩芹酸	Lipids	脂质	Free fatty acids	游离脂肪酸	593-39-5	3	111175	1.45596e+06	1.38827e+06	1.35971e+06	C08363	-
Zmgn000503	133.048	71.0136	134.058	C5H10O4	[M-H]-	2,3-Dihydroxy-3-Methylbutanoic Acid	2,3-二羟基-3-甲基丁酸	Organic acids	有机酸	Organic acids	有机酸	1756-18-9	1	110930	199923	243140	253832	C04039	-
mws0425	129.019	85.0295	130.027	C5H6O4	[M-H]-	Citraconic acid	柠康酸	Organic acids	有机酸	Organic acids	有机酸	498-23-7	3	110698	116190	110649	110279	C02226	ko00290,ko00660,ko01100,ko01210
pmd0132	496.34	184.073	495.332	C24H50NO7P	[M+H]+	LysoPC 16:0(2n isomer)	溶血磷脂酰胆碱 16:0(2n异构)	Lipids	脂质	LPC	溶血磷脂酰胆碱	-	1	110358	1.19834e+06	1.13512e+06	1.15865e+06	-	-
NK10251888	203.15	70.0653	202.143	C8H18N4O2	[M+H]+	NG,NG-Dimethyl-L-arginine*	NG,NG-二甲基-L-精氨酸*	Amino acids and derivatives	氨基酸及其衍生物	Amino acids and derivatives	氨基酸及其衍生物	30315-93-6	3	110182	158663	124525	152985	C03626	-
Lmqn008369	595.257	152.995	596.296	C27H49O12P	[M-H]-	PI(18:2/0:0)	磷脂酰肌醇(18:2/0:0)	Lipids	脂质	Glycerol ester	甘油酯	-	2	110176	1.58909e+06	1.50718e+06	1.39504e+06	-	-
pme3096	118.015	74.0237	119.022	C3H5NO4	[M-H]-	Aminomalonic acid	氨基丙二酸	Organic acids	有机酸	Organic acids	有机酸	1068-84-4	3	108154	426511	443852	438681	C00872	-
Hmhp001812	282.12	136.06	281.112	C11H15N5O4	[M+H]+	2'-O-Methyladenosine	2-甲氧基腺苷	Nucleotides and derivatives	核苷酸及其衍生物	Nucleotides and derivatives	核苷酸及其衍生物	2140-79-6	1	107970	243584	255823	244730	-	-
Zmyn000083	338.99	78.9582	339.996	C6H14O12P2	[M-H]-	D-Glucose 1,6-bisphosphate	D-葡萄糖-1,6-二磷酸	Others	其它类	Saccharides	糖类	10139-18-1	3	105562	13517.8	16335.6	13857.2	C01231	ko00500,ko01100
mws0836	577.135	425.089	578.142	C30H26O12	[M-H]-	Procyanidin B1	原花青素 B1	Tannins	鞣质	Proanthocyanidins	原花青素	20315-25-7	2	105229	166064	166590	157656	-	-
MWSHY0016	449.108	299.056	448.101	C21H20O11	[M+H]+	Luteolin-6-C-glucoside (Isoorientin)*	木犀草素-6-C-葡萄糖苷 (异荭草素)*	Flavonoids	黄酮	Flavones	黄酮	4261-42-1	2	104137	78293	95576	82273.2	C01821	-
Lmqn000432	333.058	333.056	334.067	C9H19O11P	[M-H]-	1-(sn-Glycero-3-phospho)-1D-myo-inositol	1-(sn-甘油-3-磷酸)-1D-肌醇	Others	其它类	Saccharides	糖类	-	2	103622	243215	611115	361699	-	-
Zmzn003953	309.205	227.203	310.214	C18H30O4	[M-H]-	13(s)-hydroperoxy-(9z,11e,15z)-octadecatrienoic acid	13-氢过氧化-9z,11e,15z-十八碳三烯酸	Lipids	脂质	Free fatty acids	游离脂肪酸	67597-26-6	2	102705	227093	203057	194553	C04785	ko00592,ko01100,ko01110
Zbyn001562	343.067	191.056	344.075	C14H16O10	[M-H]-	3-Galloylquinic acid*	3-O-没食子酰奎宁酸*	Phenolic acids	酚酸类	Phenolic acids	酚酸类	17365-11-6	1	100991	3.87137e+07	4.38875e+07	4.10989e+07	C10834	-
Lmgp004731	433.113	271.06	432.106	C21H20O10	[M+H]+	Genistein-7-O-galactoside	染料木素-7-O-半乳糖苷	Flavonoids	黄酮	Isoflavones	异黄酮	-	3	100501	5.809e+06	5.13221e+06	5.26028e+06	-	-
Lahp003986	435.127	273.075	434.121	C21H22O10	[M+H]+	3,4-Dihydro-4-(4'-hydroxyphenyl)-5,7-dihydroxycoumarin glucoside	3,4-二氢-4-(4'-羟基苯基)-5,7-二羟基香豆素 葡萄糖苷	Lignans and Coumarins	木脂素和香豆素	Coumarins	香豆素	-	1	99247.1	1.5174e+06	1.58358e+06	1.68282e+06	-	-
mws1488	255.233	237.222	256.24	C16H32O2	[M-H]-	Palmitic acid	棕榈酸	Lipids	脂质	Free fatty acids	游离脂肪酸	57-10-3	2	97621.4	151515	149934	141334	C00249	ko00061,ko00062,ko00071,ko00073,ko01040,ko01100,ko01212
Lhqp101805	325.093	163.039	324.084	C15H16O8	[M+H]+	Skimmin (7-Hydroxycoumarin-7-O-glucoside)	茵芋苷	Lignans and Coumarins	木脂素和香豆素	Coumarins	香豆素	93-39-0	2	97412.8	224884	208462	206406	-	-
Zmdn002353	451.126	289.073	452.132	C21H24O11	[M-H]-	Epicatechin-6-C-β-D-glucopyranoside	表儿茶素-6-C-β-D-葡萄糖苷	Flavonoids	黄酮	Flavanols	黄烷醇类	-	1	97166	99513.5	91885	114981	-	-
Lmgp003335	433.113	271.06	432.106	C21H20O10	[M+H]+	4',5-Dihydroxyisoflavone-7-O-galactoside	5,4'-二羟基异黄酮-7-O-半乳糖苷	Flavonoids	黄酮	Isoflavones	异黄酮	-	1	96399.3	6.61702e+06	5.36641e+06	4.86716e+06	-	-
Lmlp005572	433.113	271.065	432.106	C21H20O10	[M+H]+	Galangin-7-O-glucoside	高良姜素-7-O-葡萄糖苷	Flavonoids	黄酮	Flavones	黄酮	-	2	96399.3	6.61702e+06	5.36641e+06	4.86716e+06	-	-
mws0193	190.119	84.0823	189.111	C7H15N3O3	[M+H]+	L-Homocitrulline	L-高瓜氨酸	Amino acids and derivatives	氨基酸及其衍生物	Amino acids and derivatives	氨基酸及其衍生物	1190-49-4	3	96205.9	68767.4	73053.5	71126.2	C02427	-
pmf0139	179.056	59.0139	180.063	C6H12O6	[M-H]-	D-Galactose	D-半乳糖	Others	其它类	Saccharides	糖类	59-23-4	3	95488.8	499176	499763	518797	C00124	ko00052,ko01100
Zbyn001503	343.066	191.056	344.073	C14H16O10	[M-H]-	4-Galloylquinic acid*	4-O-没食子酰奎宁酸*	Phenolic acids	酚酸类	Phenolic acids	酚酸类	110170-37-1	1	95346.5	3.74173e+07	4.18088e+07	4.24764e+07	-	-
pme3961	252.109	136.062	251.102	C10H13N5O3	[M+H]+	2'-Deoxyadenosine	2'-脱氧腺苷	Nucleotides and derivatives	核苷酸及其衍生物	Nucleotides and derivatives	核苷酸及其衍生物	958-09-8	2	93241.1	215279	201866	203026	C00559	ko00230,ko01100,ko01232,ko02010
Lmbn013410	205.16	189.127	206.167	C14H22O	[M-H]-	2,4-Di-Tert-Butylphenol*	2,4-二叔丁基苯酚*	Phenolic acids	酚酸类	Phenolic acids	酚酸类	96-76-4	1	93093.1	60166.2	59534.7	55371.9	-	-
mws0262	149.009	87.0088	150.016	C4H6O6	[M-H]-	L-Tartaric acid	L-酒石酸	Organic acids	有机酸	Organic acids	有机酸	87-69-4	3	92967	116114	123386	120907	C00898	ko00630,ko01100
pmc0281	400.146	136.062	399.139	C15H21N5O8	[M+H]+	Ribosyladenosine	核糖腺苷	Nucleotides and derivatives	核苷酸及其衍生物	Nucleotides and derivatives	核苷酸及其衍生物	-	3	91801.6	120376	104559	113615	-	-
Hmyp002315	303.04	257.045	302.043	C15H10O7	[M+H]+	3,5,7,4'-Tetrahydroxy-Coumaronochromone	3,5,7,4'-四羟基香豆色原酮	Others	其它类	Chromone	色酮类	-	2	91742.9	391652	306556	317762	-	-
Zmgn001448	175.061	115.04	176.069	C7H12O5	[M-H]-	2-Propylmalic Acid	2-丙基苹果酸	Organic acids	有机酸	Organic acids	有机酸	-	2	89784.9	708984	1.31274e+06	1.3354e+06	C05994	ko00620
Lmbn001754	175.061	115.04	176.069	C7H12O5	[M-H]-	3-Isopropylmalic Acid	3-异丙基苹果酸	Organic acids	有机酸	Organic acids	有机酸	921-28-8	2	89784.9	708984	1.31274e+06	1.3354e+06	C04411	ko00290,ko01100,ko01110,ko01210,ko01230
Hagn002801	385.077	85.0297	386.1	C20H18O8	[M-H]-	5,6,7,5'-tetramethoxy-3',4'-methylenedioxyflavonoid	5,6,7,5'-四甲氧基-3',4'-亚甲二氧基类黄酮	Flavonoids	黄酮	Flavones	黄酮	-	2	89718.6	527174	441959	490321	-	-
Lmbn015605	361.238	317.249	362.246	C22H34O4	[M-H]-	Phthalic acid,6-ethyl-3-octylbutyl ester	邻苯二甲酸,6-乙基-3-辛基丁基酯	Phenolic acids	酚酸类	Phenolic acids	酚酸类	-	1	89413.8	4.70247e+06	4.8187e+06	4.49712e+06	-	-
pmb3101	175.061	115.044	176.069	C7H12O5	[M-H]-	2-Isopropylmalic Acid	2-异丙基苹果酸	Organic acids	有机酸	Organic acids	有机酸	49601-06-1	1	89290.4	1.26683e+06	1.28754e+06	1.37929e+06	C02504	ko00290,ko00620,ko01100,ko01110,ko01210,ko01230
Hmsp000364	144.098	98.09	143.095	C7H13NO2	[M+H]+	L-Cyclopentylglycine	环戊基甘氨酸	Amino acids and derivatives	氨基酸及其衍生物	Amino acids and derivatives	氨基酸及其衍生物	2521-84-8	3	87441.4	219039	183304	210844	-	-
pme3184	332.075	136.062	331.068	C10H14N5O6P	[M+H]+	2'-Deoxyadenosine-5'-monophosphate	2'-脱氧腺苷-5'-单磷酸	Nucleotides and derivatives	核苷酸及其衍生物	Nucleotides and derivatives	核苷酸及其衍生物	653-63-4	2	86083.8	81353.5	84120.1	82326.3	C00360	ko00230,ko01100,ko01232
mws0237	187.098	125.097	188.105	C9H16O4	[M-H]-	Azelaic acid	壬二酸	Organic acids	有机酸	Organic acids	有机酸	123-99-9	1	85557.5	7.97266e+06	8.16876e+06	8.24119e+06	C08261	-
mws1050	148.06	88.0393	147.053	C5H9NO4	[M+H]+	O-Acetylserine	O-乙酰丝氨酸	Amino acids and derivatives	氨基酸及其衍生物	Amino acids and derivatives	氨基酸及其衍生物	5147-00-2	3	85297.5	49214.4	42146.5	64174.3	C00979	ko00270,ko00908,ko00920,ko01100,ko01110,ko01200,ko01230,ko04122
mws0396	281.249	281.248	282.256	C18H34O2	[M-H]-	Elaidic Acid	反油酸	Lipids	脂质	Free fatty acids	游离脂肪酸	112-79-8	3	84096.2	705826	929894	791982	C01712	-
Lmgp000796	150.057	61.01	149.048	C8H7NO2	[M+H]+	4-Hydroxymandelonitrile	4-羟基扁桃腈	Alkaloids	生物碱	Phenolamine	酚胺	13093-65-7	2	82642.3	314924	311212	293971	C00650	-
MWStz191	467.119	303.05	466.111	C21H22O12	[M+H]+	Taxifolin-3'-O-glucoside	花旗松素-3'-O-葡萄糖苷	Flavonoids	黄酮	Flavanonols	二氢黄酮醇	31106-05-5	2	82578	1.28558e+06	1.07181e+06	1.03051e+06	-	-
Lmjp002906	479.118	317.065	478.111	C22H22O12	[M+H]+	Rhamnetin-3-O-Glucoside*	鼠李素-3-O-葡萄糖苷*	Flavonoids	黄酮	Flavonols	黄酮醇	27875-34-9	1	81105.2	986898	1.06129e+06	884957	-	-
pmb0981	348.07	136.062	347.063	C10H14N5O7P	[M+H]+	Adenosine 5'-monophosphate	腺苷-5'-单磷酸	Nucleotides and derivatives	核苷酸及其衍生物	Nucleotides and derivatives	核苷酸及其衍生物	61-19-8	3	80331.8	130991	146497	146779	C00020	ko00230,ko00908,ko01100,ko01110,ko01232,ko01240
pmp001309	465.103	303.1	464.096	C21H20O12	[M+H]+	6-Hydroxykaempferol-7-O-glucoside	6-羟基山柰酚-7-O-葡萄糖苷	Flavonoids	黄酮	Flavonols	黄酮醇	-	1	80146.2	1.32115e+06	1.52068e+06	1.43506e+06	-	-
Lmsn003088	635.089	169.014	636.096	C27H24O18	[M-H]-	1,4,6-Tri-O-galloyl-β-D-glucose	1,4,6-三-O-没食子酰-β-D-葡萄糖	Phenolic acids	酚酸类	Phenolic acids	酚酸类	94513-58-3	1	79496	108220	84989.7	72788.8	-	-
Lmyn002145	495.042	191.021	496.049	C20H16O15	[M-H]-	Mucic acid-1,4-lactone-3,5-di-O-gallate	粘酸-1,4-内酯-3,5-二氧没食子酸酯	Phenolic acids	酚酸类	Phenolic acids	酚酸类	-	2	79072.7	3.00804e+06	3.64279e+06	3.50648e+06	-	-
mws0126	524.371	184.073	523.364	C26H54NO7P	[M+H]+	LysoPC 18:0	溶血磷脂酰胆碱 18:0	Lipids	脂质	LPC	溶血磷脂酰胆碱	19420-57-6	1	78645.5	1.07912e+06	1.00695e+06	937695	-	-
pmb0374	136.062	119.035	135.054	C5H5N5	[M+H]+	2-Aminopurine	2-氨基嘌呤	Nucleotides and derivatives	核苷酸及其衍生物	Nucleotides and derivatives	核苷酸及其衍生物	452-06-2	1	78387	288253	301419	293471	-	-
Wbtn009050	255.065	255.065	256.074	C15H12O4	[M-H]-	1,8-dihydroxy-2,6-dimethylxanthen-9-one	1,8-二羟基-2,6-二甲基-9-蒽酮	Flavonoids	黄酮	Other Flavonoids	其它类黄酮	-	1	76024.3	60718	76095.4	54766.3	-	-
MWS4295	299.259	253.251	300.266	C18H36O3	[M-H]-	DL-2-hydroxystearic acid	DL-2-羟基硬脂酸	Lipids	脂质	Free fatty acids	游离脂肪酸	629-22-1	3	75058.7	370968	368343	336130	-	-
mws2623	281.249	281.25	282.256	C18H34O2	[M-H]-	11-Octadecanoic acid(Vaccenic acid)	11-十八碳烯酸	Lipids	脂质	Free fatty acids	游离脂肪酸	506-17-2	1	74945.4	1.23713e+06	1.1926e+06	1.12694e+06	C21944	-
Hmdn001667	463.052	300.99	464.059	C20H16O13	[M-H]-	Ellagic acid-4-O-glucoside	鞣花酸-4-O-葡萄糖苷	Tannins	鞣质	Tannin	鞣质	-	1	74818.7	1.9329e+06	1.51551e+06	2.00233e+06	-	-
Hamp011640	256.264	102.091	255.256	C16H33NO	[M+H]+	palmitic amide	十六碳酰胺	Others	其它类	Others	其它	-	1	74716.6	545369	433290	445347	-	-
pme0137	187.072	125.072	188.08	C7H12N2O4	[M-H]-	N-Acetyl-L-Glutamine	N-乙酰-L-谷氨酰胺	Amino acids and derivatives	氨基酸及其衍生物	Amino acids and derivatives	氨基酸及其衍生物	2490-97-3	3	72922.7	91187.8	132706	105680	-	-
pmf0138	179.056	59.0139	180.063	C6H12O6	[M-H]-	D-Mannose	甘露糖	Others	其它类	Saccharides	糖类	3458-28-4	3	72729.2	177015	221619	206959	C00159	ko00051,ko00052,ko00520,ko01100,ko01250,ko02010
Hmcp002207	479.118	317.06	478.111	C22H22O12	[M+H]+	Isorhamnetin-7-O-glucoside (Brassicin)*	异鼠李素-7-O-葡萄糖苷 (蔓菁苷)*	Flavonoids	黄酮	Flavonols	黄酮醇	6743-96-0	1	72665.2	830755	815384	819540	-	-
pme0274	132.102	69.0699	131.095	C6H13NO2	[M+H]+	6-Aminocaproic acid	6-氨基己酸	Organic acids	有机酸	Organic acids	有机酸	60-32-2	2	72505.9	640651	695210	563867	C02378	ko01100
Zayn005572	599.104	301.036	600.112	C28H24O15	[M-H]-	Quercetin-3-(2''-galloyl)rhamnoside	槲皮素-3-(2''-没食子酰)鼠李糖苷	Flavonoids	黄酮	Flavonols	黄酮醇	-	1	72064.3	5.40043e+07	5.23985e+07	5.18009e+07	-	-
Zmgn000447	184.98	78.9583	185.993	C3H7O7P	[M-H]-	3-Phospho-D-glyceric acid	3-磷酸-D-甘油酸	Others	其它类	Saccharides	糖类	820-11-1	3	69318.6	66993.9	58747.8	56579.3	C00197	ko00010,ko00030,ko00260,ko00270,ko00561,ko00630,ko00710,ko01100,ko01110,ko01200,ko01230,ko01240
Lmjp003044	479.118	317.062	478.111	C22H22O12	[M+H]+	Isorhamnetin-3-O-Glucoside*	异鼠李素-3-O-葡萄糖苷*	Flavonoids	黄酮	Flavonols	黄酮醇	5041-82-7	1	69205.2	730686	795539	618621	-	-
Hmgp002148	479.12	317.06	478.111	C22H22O12	[M+H]+	Nepetin-7-O-alloside	泽兰黄酮-7-O-阿洛糖苷	Flavonoids	黄酮	Flavones	黄酮	-	1	69205.2	831618	1.03368e+06	832480	-	-
Rfmb091	295.228	195.139	296.235	C18H32O3	[M-H]-	9S-Hydroxy-10E,12Z-octadecadienoic acid*	9S-羟基-10E,12Z-十八碳二烯酸*	Lipids	脂质	Free fatty acids	游离脂肪酸	15514-85-9	2	68911.1	1.24701e+06	1.23917e+06	1.15315e+06	C14767	ko00591
mws4170	179.056	59.0139	180.063	C6H12O6	[M-H]-	D-Glucose	D-葡萄糖	Others	其它类	Saccharides	糖类	50-99-7	1	67738	394826	390121	436207	C00031	ko00010,ko00030,ko00052,ko00500,ko00520,ko00524,ko00901,ko01100,ko01110,ko02010
Zmyn005384	299.26	253.255	300.266	C18H36O3	[M-H]-	2R-Hydroxyoctadecanoic Acid	2R-羟基十八烷酸	Lipids	脂质	Free fatty acids	游离脂肪酸	26633-48-7	3	67477.7	368749	352431	320076	C03042	-
mws0120	258.11	104.107	257.103	C8H20NO6P	[M+H]+	Choline Alfoscerate	甘磷酸胆碱 GPC	Lipids	脂质	PC	磷脂酰胆碱	28319-77-9	3	67281.1	573249	558778	528326	C00670	ko00564,ko00565
pmb0464	458.15	116.034	457.143	C16H27NO14	[M+H]+	L-Aspartic acid-O-diglucoside	L-天冬氨酸-O-二葡萄糖苷	Amino acids and derivatives	氨基酸及其衍生物	Amino acids and derivatives	氨基酸及其衍生物	-	3	66673.8	3.18226e+06	2.10456e+06	3.58553e+06	-	-
pme1210	150.058	61.0106	149.051	C5H11NO2S	[M+H]+	L-Methionine	L-甲硫氨酸	Amino acids and derivatives	氨基酸及其衍生物	Amino acids and derivatives	氨基酸及其衍生物	63-68-3	3	65836	170064	153922	159928	C00073	ko00270,ko00470,ko00966,ko00970,ko00999,ko01100,ko01110,ko01210,ko01230,ko01240
pme3311	338.989	96.9696	339.996	C6H14O12P2	[M-H]-	D-Fructose-1,6-biphosphate	D-果糖-1,6-二磷酸	Others	其它类	Saccharides	糖类	488-69-7	3	65622.8	8813.43	12560.9	9731.29	C00354	ko00400,ko00710,ko01100,ko01110,ko01200
pmp000097	142.086	124.073	141.079	C7H11NO2	[M+H]+	Guvacoline	去甲基槟榔碱	Alkaloids	生物碱	Piperidine alkaloids	哌啶类生物碱	495-19-2	2	65172.3	110432	111377	112587	C16821	-
Lmbn005369	295.228	195.141	296.235	C18H32O3	[M-H]-	13(S)-HODE;13(S)-Hydroxyoctadeca-9Z,11E-dienoic acid*	13-羟基十八烷基-9,11-二烯酸*	Lipids	脂质	Free fatty acids	游离脂肪酸	10219-69-9	2	65010.1	1.17878e+06	1.25276e+06	1.14772e+06	C14762	ko00591
MWSHY0142	617.114	315.071	616.106	C28H24O16	[M+H]+	Quercetin-3-O-(2''-O-galloyl)galactoside	槲皮素-3-O-(2''-O-没食子酰)半乳糖苷	Flavonoids	黄酮	Flavonols	黄酮醇	53209-27-1	2	64028.9	2.85898e+06	2.73809e+06	2.78572e+06	-	-
ML10176345	171.03	109.029	172.037	C7H8O5	[M-H]-	3-Dehydroshikimic acid	3-脱氢莽草酸	Organic acids	有机酸	Organic acids	有机酸	2922-42-1	3	63939.3	1.02498e+06	898139	736119	C02637	ko00400,ko00999,ko01100,ko01110,ko01230,ko01240
Lmhp008885	440.277	299.258	439.27	C20H42NO7P	[M+H]+	LysoPE 15:0(2n isomer)*	溶血磷脂酰乙醇胺 15:0(2n异构)*	Lipids	脂质	LPE	溶血磷脂酰乙醇胺	-	2	63917.8	28992.8	28046.6	23163	-	-
pmb3081	288.997	96.9696	290.004	C6H11PO11	[M-H]-	Glucarate O-Phosphoric acid	磷酸葡萄糖酸	Others	其它类	Saccharides	糖类	-	3	63727	225195	290339	191688	-	-
pmb0069	122.06	105.034	121.053	C7H7NO	[M+H]+	Benzamide	苯甲酰胺	Phenolic acids	酚酸类	Phenolic acids	酚酸类	55-21-0	3	63696.9	180853	132773	127044	C09815	-
mws1164	179.056	59.0139	180.063	C6H12O6	[M-H]-	D-Fructose	D-果糖	Others	其它类	Saccharides	糖类	57-48-7	1	61991.4	347433	499142	363195	C05003	-
Zmdn002400	451.125	289.073	452.132	C21H24O11	[M-H]-	Epicatechin-3'-O-β-D-glucopyranoside	表儿茶素-3'-O-β-D-葡萄糖苷	Flavonoids	黄酮	Flavanols	黄烷醇类	-	1	60271.6	31158.8	54221.2	29458.7	-	-
MWSmce039	124.037	80.0495	123.032	C6H5NO2	[M+H]+	Isonicotinic acid	异烟酸	Others	其它类	Vitamin	维生素	55-22-1	2	60057.7	612453	655986	628436	C07446	-
Wafn011571	295.229	195.14	296.235	C18H32O3	[M-H]-	alpha-Hydroxylinoleic acid	α-羟基亚油酸	Lipids	脂质	Free fatty acids	游离脂肪酸	57818-44-7	1	60002	1.18424e+06	1.19323e+06	1.13223e+06	-	-
pmp001252	284.128	147.043	283.121	C17H17NO3	[M+H]+	p-Coumaroyltyramine	对香豆酰酪胺	Alkaloids	生物碱	Phenolamine	酚胺	36417-86-4	1	58775.3	234276	216221	196747	-	-
Lmyn004187	453.01	300.999	454.017	C21H10O12	[M-H]-	Flavogallonic Acid Dilactone	黄没食子酸二内酯	Phenolic acids	酚酸类	Phenolic acids	酚酸类	103744-88-3	2	58607.8	18472.1	21049.7	12738.8	-	-
Wmyn000216	345.082	169.014	346.09	C14H18O10	[M-H]-	methyl 6-O-galloyl-β-D-gluco-pyranosid	甲基 6-O-没食子酰基-β-D-吡喃葡萄糖苷	Phenolic acids	酚酸类	Phenolic acids	酚酸类	-	2	58513.9	81862.2	76581.5	95010.5	-	-
MWSmce668	505.994	158.926	506.996	C10H16N5O13P3	[M-H]-	ATP; Adenosine 5'-Triphosphate	腺嘌呤核苷三磷酸	Nucleotides and derivatives	核苷酸及其衍生物	Nucleotides and derivatives	核苷酸及其衍生物	56-65-5	3	58394.9	10772.7	12058.4	21668.3	C00002	ko00190,ko00195,ko00230,ko00908,ko01100,ko01110,ko01232,ko01240
Wbtn006715	301.037	151.005	302.043	C15H10O7	[M-H]-	1,2,4,5,8-pentahydroxy-6-methylanthracene-9,10-dione	1,2,4,5,8-五羟基-6-甲基蒽-9,10-二酮	Flavonoids	黄酮	Other Flavonoids	其它类黄酮	-	2	56822.1	414318	364802	394880	-	-
Zahp012577	280.264	81.0725	279.256	C18H33NO	[M+H]+	octadecadienoic acid amide	十八碳二烯酸酰胺	Alkaloids	生物碱	Alkaloids	生物碱	-	2	56209.3	393757	364315	369201	-	-
mws0856	463.088	301.036	464.096	C21H20O12	[M-H]-	Quercetin-4'-O-glucoside (Spiraeoside)*	槲皮素-4'-O-葡萄糖苷 (绣线菊苷)*	Flavonoids	黄酮	Flavonols	黄酮醇	20229-56-5	1	56140.5	3.64721e+06	4.08584e+06	3.60036e+06	-	-
Lmpp003465	481.098	319.045	480.09	C21H20O13	[M+H]+	Myricetin-3-O-β-D-glucoside*	杨梅素-3-O-β-D-葡萄糖苷*	Flavonoids	黄酮	Flavonols	黄酮醇	19833-12-6	1	54859.1	1.07481e+07	1.28779e+07	1.08905e+07	-	-
Lmhp009034	452.277	311.258	451.27	C21H42NO7P	[M+H]+	LysoPE 16:1	溶血磷脂酰乙醇胺 16:1	Lipids	脂质	LPE	溶血磷脂酰乙醇胺	-	3	53351	302664	267658	252195	-	-
Cmsp002787	227.092	181.049	226.084	C11H14O5	[M+H]+	3,4'-Dihydroxy-3',5'-dimethoxypropiophenone	3,4'-二羟基-3',5'-二甲氧基苯乙酮	Phenolic acids	酚酸类	Phenolic acids	酚酸类	136196-47-9	2	53265.2	137424	145752	129517	-	-
Lmhp009187	440.277	299.258	439.27	C20H42NO7P	[M+H]+	LysoPE 15:0*	溶血磷脂酰乙醇胺 15:0*	Lipids	脂质	LPE	溶血磷脂酰乙醇胺	-	2	52722	29070.4	22453.8	24111.5	-	-
mws0001	133.061	74.0237	132.054	C4H8N2O3	[M+H]+	L-Asparagine	L-天冬酰胺	Amino acids and derivatives	氨基酸及其衍生物	Amino acids and derivatives	氨基酸及其衍生物	70-47-3	1	52534.7	30700.5	47973.5	70564	C00152	ko00250,ko00460,ko00970,ko01100,ko01110,ko01230
mws0044	303.051	125.024	304.058	C15H12O7	[M-H]-	Taxifolin(Dihydroquercetin)	花旗松素(二氢槲皮素)	Flavonoids	黄酮	Flavanonols	二氢黄酮醇	480-18-2	3	52433.3	21813.8	23713.5	22028.3	C01617	ko00941,ko01100,ko01110
mad1424	427.051	295.049	426.043	C17H14O13	[M+H]+	Ditartaroyl-hydroxycoumarin	二酒石酰-羟基香豆素	Lignans and Coumarins	木脂素和香豆素	Coumarins	香豆素	-	3	52342.2	186766	167125	170469	-	-
pmp000604	435.129	273.07	434.121	C21H22O10	[M+H]+	Rubrofusarin-6-O-glucoside	红镰霉素-6-O-葡萄糖苷	Others	其它类	Ketone compounds	酮类化合物	132922-80-6	1	52219.9	1.54558e+06	1.56545e+06	1.45253e+06	-	-
mws1329	463.088	301.036	464.096	C21H20O12	[M-H]-	Quercetin-7-O-glucoside*	槲皮素-7-O-葡萄糖苷*	Flavonoids	黄酮	Flavonols	黄酮醇	491-50-9	1	52156.9	4.051e+06	3.55218e+06	3.4665e+06	C12639	-
ML10180524	244.095	112.054	243.085	C9H13N3O5	[M+H]+	Cytarabine	胞嘧啶阿拉伯糖苷	Nucleotides and derivatives	核苷酸及其衍生物	Nucleotides and derivatives	核苷酸及其衍生物	147-94-4	2	52124	472941	473328	489241	C02961	-
pme0271	115.004	71.0139	116.011	C4H4O4	[M-H]-	Maleic acid*	马来酸 (顺丁烯二酸)*	Organic acids	有机酸	Organic acids	有机酸	110-16-7	1	51025.7	878834	829343	883468	C01384	ko00350,ko00650,ko00760,ko01100
mws0376	115.004	71.0139	116.011	C4H4O4	[M-H]-	Fumaric acid*	延胡索酸(富马酸,反丁烯二酸)*	Organic acids	有机酸	Organic acids	有机酸	110-17-8	1	51025.7	878834	829343	883468	C00122	ko00020,ko00190,ko00220,ko00250,ko00350,ko00360,ko00620,ko00650,ko00760,ko01100,ko01110,ko01200
Lmqp000329	296.067	104.108	295.057	C8H14N3O7P	[M+H]+	5-Aminoimidazole ribonucleotide	5-氨基咪唑核糖核苷酸	Nucleotides and derivatives	核苷酸及其衍生物	Nucleotides and derivatives	核苷酸及其衍生物	25635-88-5	2	50754.5	295329	209266	241137	-	-
Zmyn004732	293.213	185.119	294.219	C18H30O3	[M-H]-	2R-hydroxy-9Z,12Z,15Z-octadecatrienoic acid	2R-羟基-9Z,12Z,15Z-十八碳三烯酸	Lipids	脂质	Free fatty acids	游离脂肪酸	-	3	50503.1	375550	415678	373937	C16342	ko00592
mws1715	252.109	136.062	251.102	C10H13N5O3	[M+H]+	Cordycepin (3'-Deoxyadenosine)	虫草素(3'-脱氧腺苷)	Nucleotides and derivatives	核苷酸及其衍生物	Nucleotides and derivatives	核苷酸及其衍生物	73-03-0	2	50041.4	136927	129834	139612	C08431	-
Lmhp011549	550.387	184.073	549.379	C28H56NO7P	[M+H]+	LysoPC 20:1	溶血磷脂酰胆碱 20:1	Lipids	脂质	LPC	溶血磷脂酰胆碱	-	2	49970.1	91586.1	92842.4	82046.2	-	-
Wbtp005759	303.051	303.05	302.043	C15H10O7	[M+H]+	1,2,5,7,8-pentahydroxy-3-methylanthracene-9,10-dione	1,2,5,7,8-五羟基-3-甲基蒽-9,10-二酮	Flavonoids	黄酮	Other Flavonoids	其它类黄酮	-	2	49859.8	439164	403595	393762	-	-
Wbtp004753	303.048	229.047	302.043	C15H10O7	[M+H]+	1,2,3,7,8-pentahydroxy-6-methylanthracene-9,10-dione	1,2,3,7,8-五羟基-6-甲基蒽-9,10-二酮	Flavonoids	黄酮	Other Flavonoids	其它类黄酮	-	2	49648.3	776853	677696	797651	-	-
Lmhp010908	536.371	184.073	535.364	C27H54NO7P	[M+H]+	LysoPC 19:1	溶血磷脂酰胆碱 19:1	Lipids	脂质	LPC	溶血磷脂酰胆碱	-	3	49378.7	132566	122152	122364	-	-
Wmkp002590	595.186	127.039	594.159	C27H30O15	[M+H]+	5,7-Dihydroxy-4-methoxyflavone-3-O-xylose-(1-6)-glucose	5,7-二羟基-4-甲氧基黄酮-3-O-木糖-(1-6)-葡萄糖	Flavonoids	黄酮	Flavones	黄酮	-	2	48286.5	137511	126842	124025	-	-
Lmhp008763	452.277	311.258	451.27	C21H42NO7P	[M+H]+	LysoPE 16:1(2n isomer)	溶血磷脂酰乙醇胺 16:1(2n异构)	Lipids	脂质	LPE	溶血磷脂酰乙醇胺	-	3	48199.3	293278	260041	267061	-	-
Lmhp010757	506.324	365.305	505.317	C25H48NO7P	[M+H]+	LysoPE 20:2	溶血磷脂酰乙醇胺 20:2	Lipids	脂质	LPE	溶血磷脂酰乙醇胺	-	3	48053.8	22487.1	17881.9	17006.7	-	-
MWS1962	153.127	83.0474	152.12	C10H16O	[M+H]+	cis-Citral	柠檬醛	Organic acids	有机酸	Organic acids	有机酸	5392-40-5	3	47827.6	148840	133147	141602	C09847	ko01110
pmb2640	199.17	199.17	200.178	C12H24O2	[M-H]-	Dodecanoic acid (Lauric acid)	十二烷酸(月桂酸)	Lipids	脂质	Free fatty acids	游离脂肪酸	143-07-7	1	47160.6	173431	173888	171338	C02679	ko00061,ko01100,ko01110
MWS201442	267.135	120.081	266.127	C13H18N2O4	[M+H]+	Phe-Thr	L-苯丙氨酸-L-苏氨酸	Amino acids and derivatives	氨基酸及其衍生物	Amino acids and derivatives	氨基酸及其衍生物	51352-44-4	2	47059.4	46069.3	52761	51103	-	-
mws1051	399.144	250.094	399.144	C15H23N6O5S+	[M]+	S-Adenosylmethionine	S-腺苷蛋氨酸	Amino acids and derivatives	氨基酸及其衍生物	Amino acids and derivatives	氨基酸及其衍生物	485-80-3	3	46732.5	65724.7	60051.7	79397.4	-	-
mws0248	243.062	110.025	244.07	C9H12N2O6	[M-H]-	Uridine	尿嘧啶核苷	Nucleotides and derivatives	核苷酸及其衍生物	Nucleotides and derivatives	核苷酸及其衍生物	58-96-8	1	46593.9	341124	296658	418706	C00299	ko00240,ko01100,ko01232,ko02010
pmn001529	629.078	169.013	630.086	C28H22O17	[M-H]-	3,4,5-Tri-O-Galloylshikimic acid	3,4,5-三没食子酰莽草酸	Phenolic acids	酚酸类	Phenolic acids	酚酸类	-	2	46430.8	151352	135523	134785	-	-
pmb3006	431.098	269.041	432.106	C21H20O10	[M-H]-	Apigenin-7-O-glucoside(Cosmosiin)	芹菜素-7-O-葡萄糖苷	Flavonoids	黄酮	Flavones	黄酮	578-74-5	3	46148.9	11479.4	10772.5	15793.2	C04608	ko00944
Lmfp003403	481.098	319.048	480.09	C21H20O13	[M+H]+	Quercetagetin-7-O-glucoside(Quercetagitrin)	槲皮万寿菊素-7-O-葡萄糖苷(万寿菊苷)	Flavonoids	黄酮	Flavonols	黄酮醇	548-75-4	1	45984.9	9.57856e+06	8464419	1.08684e+07	-	-
Li512111	519.114	315.051	520.122	C24H24O13	[M-H]-	Isorhamnetin-3-O-(6''-acetylglucoside)	异鼠李素-3-O-(6''-乙酰)葡萄糖苷	Flavonoids	黄酮	Flavonols	黄酮醇	-	2	45812.9	170510	194883	173758	-	-
Zmdp002216	261.145	86.0968	260.137	C11H20N2O5	[M+H]+	L-γ-Glutamyl-L-leucine	L-γ-谷氨酰胺-L-亮氨酸	Amino acids and derivatives	氨基酸及其衍生物	Amino acids and derivatives	氨基酸及其衍生物	2566-39-4	2	45509.8	283975	293625	365996	-	-
pme0124	173.092	116.071	172.085	C7H12N2O3	[M+H]+	L-Glycyl-L-proline	L-甘氨酰-L-脯氨酸	Amino acids and derivatives	氨基酸及其衍生物	Amino acids and derivatives	氨基酸及其衍生物	704-15-4	3	44680.4	63903.8	68298.2	80654.6	-	-
mws0183	153.019	109.029	154.027	C7H6O4	[M-H]-	3,4-Dihydroxybenzoic acid (Protocatechuic acid)*	3,4-二羟基苯甲酸; 原儿茶酸*	Phenolic acids	酚酸类	Phenolic acids	酚酸类	99-50-3	3	44640.3	215452	245732	206979	C00230	ko01100,ko01110
Hmmp001310	188.071	118.065	187.063	C11H9NO2	[M+H]+	3-Indoleacrylic acid	3-吲哚丙烯酸	Alkaloids	生物碱	Plumerane	吲哚类生物碱	1204-06-4	1	44313	551408	532173	524191	C21283	-
mws0668	283.068	151.026	284.076	C10H12N4O6	[M-H]-	Xanthosine	黄苷	Nucleotides and derivatives	核苷酸及其衍生物	Nucleotides and derivatives	核苷酸及其衍生物	146-80-5	1	44023.8	132660	143129	122561	C01762	ko00230,ko00232,ko01100,ko01110,ko01232,ko02010
pme0436	577.135	407.076	578.142	C30H26O12	[M-H]-	Procyanidin B3	原花青素 B3	Tannins	鞣质	Proanthocyanidins	原花青素	23567-23-9	1	43665.2	133739	126570	156031	-	-
mws0214	181.072	71.0139	182.079	C6H14O6	[M-H]-	D-Sorbitol	D-山梨糖醇	Others	其它类	Saccharides	糖类	50-70-4	3	43658.6	69338.6	58424.6	74284.8	C00794	ko00051,ko00052,ko01100,ko02010
Hmgp002327	188.071	118.06	187.063	C11H9O2N	[M+H]+	3-amino-2-naphthoic acid	3-氨基-2-萘甲酸	Alkaloids	生物碱	Alkaloids	生物碱	-	1	43499.4	386238	373164	368524	-	-
pmn001694	329.233	229.146	330.241	C18H34O5	[M-H]-	9,10,13-Trihydroxy-11-Octadecenoic Acid	9,10,13-三羟基-11-十八碳烯酸	Lipids	脂质	Free fatty acids	游离脂肪酸	29907-57-1	1	43391.4	3.48962e+06	3.11526e+06	3.07232e+06	C14835	ko00591
mws0924	145.051	101.061	146.058	C6H10O4	[M-H]-	2-Methylglutaric acid	2-甲基戊二酸	Organic acids	有机酸	Organic acids	有机酸	617-62-9	3	43322	139985	149493	133647	-	-
mws0208	145.051	101.061	146.058	C6H10O4	[M-H]-	Adipic Acid	己二酸	Organic acids	有机酸	Organic acids	有机酸	124-04-9	3	43322	139985	149493	133647	C06104	ko01100
pme2960	273.076	153.018	272.068	C15H12O5	[M+H]+	Naringenin chalcone; 2',4,4',6'-Tetrahydroxychalcone	柚皮素查耳酮	Flavonoids	黄酮	Chalcones	查耳酮	73692-50-9	3	42824.4	22254.3	16443.8	20221.5	C06561	ko00941,ko01100,ko01110
Wmzn000227	145.062	109.041	146.058	C6H10O4	[M-H]-	2,2-Dimethylsuccinic acid	2,2-二甲基琥珀酸	Organic acids	有机酸	Organic acids	有机酸	597-43-3	1	41746	40500	23295.3	24554.3	-	-
HJAP005	495.113	333.068	494.106	C22H22O13	[M+H]+	Laricitrin-3-O-glucoside	西伯利亚落叶松黄酮-3-O-葡萄糖苷	Flavonoids	黄酮	Flavonols	黄酮醇	39986-90-8	1	40554.9	2.38818e+06	2.76194e+06	2.03666e+06	-	-
mws0224	150.058	61.0106	149.051	C5H11NO2S	[M+H]+	DL-Methionine	DL-蛋氨酸	Amino acids and derivatives	氨基酸及其衍生物	Amino acids and derivatives	氨基酸及其衍生物	59-51-8	3	39949.8	213825	204863	233546	-	-
HJN087	433.12	271.065	434.121	C21H22O10	[M-H]-	Naringenin-4'-O-glucoside	柚皮素-4'-O-葡萄糖苷	Flavonoids	黄酮	Flavanones	二氢黄酮	-	2	39899	686466	733283	672525	-	-
MWS5231	243.161	181.158	244.167	C13H24O4	[M-H]-	Tridecanedioic acid	十三碳二酸	Lipids	脂质	Free fatty acids	游离脂肪酸	505-52-2	2	39094.7	61777.5	56092.5	50249.7	-	-
Zmyn000247	147.03	57.0346	148.037	C5H8O5	[M-H]-	2-Hydroxyglutaric Acid	2-羟基戊二酸	Organic acids	有机酸	Organic acids	有机酸	13095-48-2	1	39037.4	174562	228151	198482	C03196	ko00310,ko01100
mws1346	162.076	98.0601	161.069	C6H11NO4	[M+H]+	DL-2-Aminoadipic acid	DL-2-氨基己二酸	Alkaloids	生物碱	Alkaloids	生物碱	542-32-5	3	38636.9	234279	202689	252295	C00956	ko00300,ko00310,ko00311,ko01100,ko01110,ko01210,ko01230
MWSmce676	149.046	59.0132	150.053	C5H10O5	[M-H]-	D-Arabinose	D-阿拉伯糖	Others	其它类	Saccharides	糖类	10323-20-3	2	38548.1	179871	196584	188683	C00216	ko00040,ko00053,ko00520,ko01100,ko01250
Lmhp009464	466.293	325.274	465.286	C22H44NO7P	[M+H]+	LysoPE 17:1(2n isomer)	溶血磷脂酰乙醇胺 17:1(2n异构)	Lipids	脂质	LPE	溶血磷脂酰乙醇胺	-	3	37878.8	55591.9	54811.8	51507.5	-	-
pme0183	152.057	135.03	151.049	C5H5N5O	[M+H]+	Isoguanine	异鸟嘌呤	Nucleotides and derivatives	核苷酸及其衍生物	Nucleotides and derivatives	核苷酸及其衍生物	3373-53-3	3	37830.9	221563	186132	255882	-	-
Zmdp001857	311.124	165.055	310.116	C14H18N2O6	[M+H]+	γ-Glutamyltyrosine	γ-谷氨酰胺酪氨酸	Amino acids and derivatives	氨基酸及其衍生物	Amino acids and derivatives	氨基酸及其衍生物	7432-23-7	1	37234.8	55305.3	42629.8	54931	-	-
pmb0751	321.097	147.044	320.09	C16H16O7	[M+H]+	Trans-5-O-(p-Coumaroyl)shikimate	反式-5-O-对香豆酰莽草酸	Phenolic acids	酚酸类	Phenolic acids	酚酸类	-	3	37113.2	68098.3	38965.7	38643.5	C02947	ko00940,ko00941,ko00945,ko01100,ko01110
pmb2804	311.223	171.138	312.23	C18H32O4	[M-H]-	13S-Hydroperoxy-9Z,11E-octadecadienoic acid	13-氢过氧化-9,11-十八碳二烯酸	Lipids	脂质	Free fatty acids	游离脂肪酸	33964-75-9	3	36625.8	194547	184308	203867	C04717	ko00591,ko01100
Hmdp001794	769.089	303.05	768.117	C35H28O20	[M+H]+	Quercetin-3-O-(2'',3''-O-digalloyl)-glucoside	槲皮素-3-O-(2'',3''-O-二没食子酰)葡萄糖苷	Flavonoids	黄酮	Flavonols	黄酮醇	-	2	36520	51379.1	32998.2	51543.7	-	-
MWS1816	183.139	183.135	184.146	C11H20O2	[M-H]-	10-Undecenoic acid	10-十一烯酸	Lipids	脂质	Free fatty acids	游离脂肪酸	112-38-9	3	36317.5	23159.3	20134.8	29985.3	C13910	-
Zmlp005019	463.087	331.046	462.08	C21H18O12	[M+H]+	3,3'-O-Dimethylellagic Acid-4'-O-arabinoside	3,3'-O-二甲基鞣花酸-4'-O-阿拉伯糖苷	Tannins	鞣质	Tannin	鞣质	-	2	36175.8	398246	291401	277267	-	-
mws0180	153.019	109.029	154.027	C7H6O4	[M-H]-	2,5-Dihydroxybenzoic acid; Gentisic Acid*	2,5-二羟基苯甲酸; 龙胆酸*	Phenolic acids	酚酸类	Phenolic acids	酚酸类	490-79-9	3	35968.8	750733	819607	787757	C00628	ko00350,ko01100
pmb2871	315.072	153.019	316.079	C13H16O9	[M-H]-	1-O-Gentisoyl-β-D-glucoside	1-O-龙胆酰-β-D-葡萄糖	Phenolic acids	酚酸类	Phenolic acids	酚酸类	23445-11-6	1	35792	1.29626e+06	1.23005e+06	1.25072e+06	-	-
pmn001367	315.072	153.017	316.079	C13H16O9	[M-H]-	Protocatechuic acid-4-O-glucoside	原儿茶酸-4-O-葡萄糖苷	Phenolic acids	酚酸类	Phenolic acids	酚酸类	-	1	35792	1.29626e+06	1.23005e+06	1.25072e+06	-	-
Lmdp002969	481.097	319.057	480.09	C21H20O13	[M+H]+	Myricetin-3-O-galactoside*	杨梅素-3-O-半乳糖苷*	Flavonoids	黄酮	Flavonols	黄酮醇	15648-86-9	1	35767.4	1.19088e+07	1.47863e+07	1.22418e+07	-	-
mws0914	271.061	151.003	272.068	C15H12O5	[M-H]-	3,5,7-Trihydroxyflavanone (Pinobanksin)	3,5,7-三羟基黄烷酮 (短叶松素)	Flavonoids	黄酮	Flavanonols	二氢黄酮醇	548-82-3	2	35554.4	412376	358364	377226	C09826	ko00941
mws2212	179.035	135.046	180.042	C9H8O4	[M-H]-	Caffeic acid	咖啡酸	Phenolic acids	酚酸类	Phenolic acids	酚酸类	331-39-5	2	35407.1	2.2159e+06	2.22049e+06	2.25302e+06	C01197	ko00940,ko01100,ko01110
pme3732	244.093	112.05	243.085	C9H13N3O5	[M+H]+	Cytidine	胞苷	Nucleotides and derivatives	核苷酸及其衍生物	Nucleotides and derivatives	核苷酸及其衍生物	65-46-3	2	34590.2	295650	160100	241447	C00475	ko00240,ko01100,ko01232,ko02010
mws0146	138.055	78.0338	137.048	C7H7NO2	[M+H]+	Nicotinic Acid Methyl Ester(Methyl Nicotinate)	烟酸甲酯	Alkaloids	生物碱	Pyridine alkaloids	吡啶类生物碱	93-60-7	3	34396.4	20616.2	22620.1	18499.1	-	-
mws0049	307.081	139.039	306.074	C15H14O7	[M+H]+	Gallocatechin	没食子儿茶素	Flavonoids	黄酮	Flavanols	黄烷醇类	970-73-0	1	34394.8	5.43062e+06	4.69804e+06	5.79565e+06	C12127	ko00941,ko01110
Wafp002664	293.157	147.044	292.142	C15H20N2O4	[M+H]+	1-O-p-Coumaroyllysine	1-O-对香豆酰赖氨酸	Alkaloids	生物碱	Phenolamine	酚胺	-	2	34237.5	161493	126212	118056	-	-
Lmmp002795	463.12	301.07	462.116	C22H22O11	[M+H]+	Pratensein-7-O-glucoside	红车轴草素-7-O-葡萄糖苷	Flavonoids	黄酮	Isoflavones	异黄酮	36191-03-4	3	33904	25020.1	24897	23619.6	-	-
Zmyn005252	285.244	239.238	286.251	C17H34O3	[M-H]-	3-Hydroxy-palmitic acid methyl ester	3-羟基-棕榈酸甲酯	Lipids	脂质	Free fatty acids	游离脂肪酸	51883-36-4	3	33369.1	354613	301367	343965	C11849	-
Lmtp003948	481.134	319.046	480.127	C22H24O12	[M+H]+	3',5',5,7-Tetrahydroxy-4'-methoxyflavanone-3'-O-glucoside	3',5',5,7-四羟基-4'-甲氧基黄烷酮-3'-O-葡萄糖苷	Flavonoids	黄酮	Flavones	黄酮	-	2	33124.1	7.8417e+06	8.49048e+06	6.91656e+06	-	-
pmd0160	454.293	313.274	453.286	C21H44NO7P	[M+H]+	LysoPE 16:0(2n isomer)	溶血磷脂酰乙醇胺 16:0(2n异构)	Lipids	脂质	LPE	溶血磷脂酰乙醇胺	-	1	32965.9	251333	266711	243030	-	-
pme2735	399.144	250.095	398.137	C15H22N6O5S	[M+H]+	S-(5'-Adenosyl)-L-methionine	S-(5'-腺苷基)-L-蛋氨酸	Amino acids and derivatives	氨基酸及其衍生物	Amino acids and derivatives	氨基酸及其衍生物	29908-03-0	3	32629.8	61634.8	72425	81038.2	C00019	ko00261,ko00270,ko00330,ko00908,ko00999,ko01100,ko01110,ko01230,ko01240,ko04122
Zmtp102902	339.107	177.055	338.1	C16H18O8	[M+H]+	α-Hydrojuglone glucoside	α-氢化胡桃叶醌葡萄糖苷	Quinones	醌类	Quinones	醌类	-	2	32608	480122	386625	243688	-	-
Lmbp102601	163.04	89.0378	162.032	C9H6O3	[M+H]+	7-Hydroxycoumarin;Umbelliferone	7-羟基香豆素;伞形酮	Lignans and Coumarins	木脂素和香豆素	Coumarins	香豆素	93-35-6	2	31792.9	1.88082e+06	2.07743e+06	2.27565e+06	C09315	ko00999,ko01110
pmb2406	510.355	184.073	509.348	C25H52NO7P	[M+H]+	LysoPC 17:0	溶血磷脂酰胆碱 17:0	Lipids	脂质	LPC	溶血磷脂酰胆碱	50930-23-9	3	31673.7	337745	315898	319478	-	-
pmp001270	494.324	184.073	493.317	C24H48NO7P	[M+H]+	LysoPC 16:1	溶血磷脂酰胆碱 16:1	Lipids	脂质	LPC	溶血磷脂酰胆碱	76790-27-7	2	31396.2	159132	99502.8	94535.4	-	-
Lmbn000216	147.03	57.0344	148.037	C5H8O5	[M-H]-	3-Methylmalic acid	3-甲基苹果酸	Organic acids	有机酸	Organic acids	有机酸	152204-30-3	2	29843.7	267014	203653	223966	C06032	ko00290,ko00660,ko01100,ko01210,ko01230
Lmhp009890	546.355	184.073	545.348	C28H52NO7P	[M+H]+	LysoPC 20:3	溶血磷脂酰胆碱 20:3	Lipids	脂质	LPC	溶血磷脂酰胆碱	1199257-41-4	2	29104.2	43262.9	38465	36015.2	-	-
pme0376	271.061	151.004	272.068	C15H12O5	[M-H]-	Naringenin (5,7,4'-Trihydroxyflavanone)	柚皮素	Flavonoids	黄酮	Flavanones	二氢黄酮	480-41-1	2	29039.4	390541	356702	362287	C00509	ko00941,ko00943,ko01100,ko01110
MWS1771	196.097	91.0546	195.089	C10H13NO3	[M+H]+	L-Tyrosine methyl ester	L-酪氨酸甲酯	Amino acids and derivatives	氨基酸及其衍生物	Amino acids and derivatives	氨基酸及其衍生物	1080-06-4	3	28492.7	127173	109448	128274	C03404	-
pme1816	353.088	191.056	354.095	C16H18O9	[M-H]-	Neochlorogenic acid (5-O-Caffeoylquinic acid)	新绿原酸 (5-O-咖啡酰奎宁酸)	Phenolic acids	酚酸类	Phenolic acids	酚酸类	906-33-2	1	27319.6	2.05492e+07	2.18391e+07	1.94066e+07	C17147	-
mws0736	189.123	86.0964	188.116	C8H16N2O3	[M+H]+	N-Glycyl-L-leucine*	N-甘氨酰-L-亮氨酸*	Amino acids and derivatives	氨基酸及其衍生物	Amino acids and derivatives	氨基酸及其衍生物	869-19-2	3	27102.5	140053	127814	136799	C02155	-
HX1365	147.043	91.0538	146.037	C9H6O2	[M+H]+	Coumarin	香豆素	Lignans and Coumarins	木脂素和香豆素	Coumarins	香豆素	91-64-5	2	27057.2	4.06353e+06	3.16308e+06	4.57227e+06	C05851	ko00999,ko01110
Lmsn015919	658.854	482.926	659.861	C6H18O24P6	[M-H]-	Phytic acid	植酸	Organic acids	有机酸	Organic acids	有机酸	83-86-3	2	26874.8	17629.5	19171.6	28009.5	C01204	ko00562,ko01100,ko04070
Zmtn001624	188.035	144.046	189.043	C10H7NO3	[M-H]-	N-Acetylisatin	N-乙酰靛红	Alkaloids	生物碱	Plumerane	吲哚类生物碱	574-17-4	3	26774.4	212110	201794	200728	C02172	ko00380
MWS1983	343.125	89.0254	344.132	C12H24O11	[M-H]-	Maltitol	麦芽糖醇	Others	其它类	Saccharides	糖类	585-88-6	3	26756.4	50519.2	45699.7	32628.9	-	-
Lczn000058	481.098	313.057	482.106	C21H22O13	[M-H]-	6-O-Galloyl-1-O-vanilloyl-β-D-glucose	6-O-没食子酰基-1-O-香草酰基-β-D-葡萄糖	Phenolic acids	酚酸类	Phenolic acids	酚酸类	-	2	26525.4	298228	279862	295600	-	-
MWSCX015	165.055	91.0526	164.047	C9H8O3	[M+H]+	Caffeic aldehyde	咖啡醛	Phenolic acids	酚酸类	Phenolic acids	酚酸类	141632-15-7	2	26266.8	143934	155005	157257	C10945	ko00940,ko01110
HX1361	177.054	89.0381	176.047	C10H8O3	[M+H]+	7-Methoxycoumarin	7-甲氧基香豆素	Lignans and Coumarins	木脂素和香豆素	Coumarins	香豆素	531-59-9	2	26196.8	268926	383442	296890	C09268	-
Zmjn014062	455.35	455.35	456.36	C30H48O3	[M-H]-	3-Hydroxydammara-21-oic acid 21,23-lactone	3-羟基达玛烷-21-酸-21,23-内酯	Terpenoids	萜类	Triterpene	三萜	-	2	26057.6	2.05027e+06	1.94736e+06	1.91517e+06	-	-
Zmyn004676	293.213	113.098	294.219	C18H30O3	[M-H]-	17-Hydroxylinolenic acid	17-羟基亚麻酸	Lipids	脂质	Free fatty acids	游离脂肪酸	-	3	25987.6	645646	605958	586348	C16346	ko00592
mws0889	135.03	75.0088	136.037	C4H8O5	[M-H]-	D-Threonic Acid	D-苏糖酸	Others	其它类	Saccharides	糖类	3909-12-4	1	25679.7	181637	181713	196275	C21649	-
mws1060	267.074	135.031	268.081	C10H12N4O5	[M-H]-	9-(Arabinosyl)hypoxanthine	9-(阿拉伯糖基)次黄嘌呤	Nucleotides and derivatives	核苷酸及其衍生物	Nucleotides and derivatives	核苷酸及其衍生物	7013-16-3	1	25433.7	281444	278346	234490	-	-
pme2596	184.06	148.039	183.053	C8H9NO4	[M+H]+	4-Pyridoxic acid	4-吡哆酸	Others	其它类	Vitamin	维生素	82-82-6	3	25307.7	241866	218136	235680	C00847	ko00750,ko01100
Wbtn006721	285.04	133.029	286.048	C15H10O6	[M-H]-	6,8-dihydroxy-3-methyl-9-oxoxanthene-1-carboxylic acid	6,8-二羟基-3-甲基-9-氧杂蒽-1-羧酸	Others	其它类	Ketone compounds	酮类化合物	-	1	25275.3	1.12344e+06	960198	909660	-	-
pme2117	426.022	158.925	427.029	C10H15N5O10P2	[M-H]-	Adenosine 5'-diphosphate	腺苷-5'-二磷酸	Nucleotides and derivatives	核苷酸及其衍生物	Nucleotides and derivatives	核苷酸及其衍生物	58-64-0	3	25194.1	13140.1	25057.1	19201.1	C00008	ko00190,ko00195,ko00230,ko00908,ko01100,ko01110,ko01232,ko01240
mws0749	137.024	93.0346	138.032	C7H6O3	[M-H]-	4-Hydroxybenzoic acid	4-羟基苯甲酸	Phenolic acids	酚酸类	Phenolic acids	酚酸类	99-96-7	2	25165.4	1.20911e+06	1.18661e+06	1.38093e+06	C00156	ko00130,ko00790,ko01100,ko01110,ko01240
Hmyp002656	222.075	130.064	221.069	C11H11NO4	[M+H]+	Methyl dioxindole-3-acetate	甲基-二氧吲哚-乙酸	Alkaloids	生物碱	Plumerane	吲哚类生物碱	57061-18-4	2	24911.3	93273.3	125155	103087	-	-
pmb0296	357.3	265.253	356.293	C21H40O4	[M+H]+	1-Oleoyl-Sn-Glycerol	单酰甘油酯(18:1)	Lipids	脂质	Glycerol ester	甘油酯	129784-87-8	3	24812.7	45331.5	39060.8	37911.1	-	-
Zmtn001661	315.106	153.019	316.116	C14H20O8	[M-H]-	Vanilloloside	香草醇苷	Phenolic acids	酚酸类	Phenolic acids	酚酸类	74950-96-2	2	24446.3	1.86102e+06	2.63429e+06	1.61046e+06	-	-
MWSHY0100	435.091	303.058	434.085	C20H18O11	[M+H]+	Avicularin(Quercetin-3-O-α-L-arabinofuranoside)	扁蓄苷(广寄生苷)	Flavonoids	黄酮	Flavonols	黄酮醇	572-30-5	2	24261.4	1.90296e+07	16604305	1.73125e+07	-	-
Lmdp003509	435.092	303.061	434.085	C20H18O11	[M+H]+	Quercetin-3-O-xyloside (Reynoutrin)	槲皮素-3-O-木糖苷 (瑞诺苷)	Flavonoids	黄酮	Flavonols	黄酮醇	549-32-6	3	24261.4	1.99016e+07	2.03243e+07	1.57472e+07	-	-
MWSCX017	165.053	119.051	164.047	C9H8O3	[M+H]+	4-hydroxyphenyl acrylaldehyde	4-羟苯基丙烯醛	Others	其它类	Aldehyde compounds	醛类化合物	-	1	24172	126823	129843	89788.2	-	-
mws1089	421.075	241.011	422.082	C12H23O14P	[M-H]-	Sucrose-6-phosphate	蔗糖-6-磷酸	Others	其它类	Saccharides	糖类	-	3	23600.1	21448.6	21547.5	17397.7	-	-
mws1350	181.051	151.003	182.058	C9H10O4	[M-H]-	Syringaldehyde; 4-Hydroxy-3,5-Dimethoxybenzaldehyde	丁香醛; 4-羟基-3,5-二甲氧基苯甲醛	Phenolic acids	酚酸类	Phenolic acids	酚酸类	134-96-3	3	23333.8	23731.3	21197.8	28559	-	-
Jmzn006005	177.055	117.04	178.063	C10H10O3	[M-H]-	3,4-Methylenedioxy cinnamyl alcohol	3,4-亚甲二氧肉桂醇	Lignans and Coumarins	木脂素和香豆素	Lignans	木脂素	58095-76-4	1	22949.2	131316	140006	137299	-	-
mws0917	329.067	314.043	330.074	C17H14O7	[M-H]-	3,7-Di-O-methylquercetin	3,7-二-O-甲基槲皮素	Flavonoids	黄酮	Flavonols	黄酮醇	2068-02-2	3	22899.6	19986.7	20624.4	21692.1	C01265	ko00944,ko01110
pme0057	136.043	118.032	135.035	C4H9NO2S	[M+H]+	L-Homocysteine	L-高半胱氨酸	Amino acids and derivatives	氨基酸及其衍生物	Amino acids and derivatives	氨基酸及其衍生物	6027-13-0	3	22683	103306	96060.4	103306	C00155	ko00270,ko00920,ko01100,ko01110,ko01230
Zmdp001647	247.129	184.097	246.122	C10H18N2O5	[M+H]+	γ-Glutamyl-L-valine	γ-谷氨酰胺缬氨酸	Amino acids and derivatives	氨基酸及其衍生物	Amino acids and derivatives	氨基酸及其衍生物	-	3	22216.3	57654.6	47184.2	53331.9	-	-
MWSmce199	149.049	59.0162	150.053	C5H10O5	[M-H]-	L-Xylose	L-木糖	Others	其它类	Saccharides	糖类	609-06-3	2	21970.9	212356	215259	233608	C01510	-
mws0255	112.05	95.0239	111.043	C4H5N3O	[M+H]+	Cytosine	胞嘧啶	Nucleotides and derivatives	核苷酸及其衍生物	Nucleotides and derivatives	核苷酸及其衍生物	71-30-7	3	21695.5	125698	118053	127151	C00380	ko00240,ko01100,ko01232
MWS201478	253.118	120.086	252.111	C12H16N2O4	[M+H]+	Phe-Ser	L-苯丙氨酸-L-丝氨酸	Amino acids and derivatives	氨基酸及其衍生物	Amino acids and derivatives	氨基酸及其衍生物	16053-39-7	2	21589.4	56180.7	49511.7	47211.6	-	-
pmp001198	132.102	57.0335	131.095	C6H13NO2	[M+H]+	6-Deoxyfagomine	6-脱氧荞麦碱	Alkaloids	生物碱	Piperidine alkaloids	哌啶类生物碱	197449-09-5	1	20566.9	433332	439699	373028	-	-
Cmyn001328	339.069	177.018	340.079	C15H16O9	[M-H]-	Daphnin	瑞香苷	Lignans and Coumarins	木脂素和香豆素	Coumarins	香豆素	486-55-5	1	20256.7	5.60864e+06	5.5269e+06	5.0385e+06	C01421	-
MWSHY0061	595.164	287.055	594.159	C27H30O15	[M+H]+	Kaempferol-3-O-neohesperidoside*	山柰酚-3-O-新橙皮糖苷*	Flavonoids	黄酮	Flavonols	黄酮醇	32602-81-6	1	20024	6.84336e+06	7.37606e+06	6.98564e+06	-	-
MWS201465	295.129	120.082	294.122	C14H18N2O5	[M+H]+	Glu-Phe	L-谷氨酸-L-苯丙氨酸	Amino acids and derivatives	氨基酸及其衍生物	Amino acids and derivatives	氨基酸及其衍生物	20556-22-3	2	19982.1	71331.1	78110.3	68452.2	-	-
pme2122	112.087	95.0604	111.08	C5H9N3	[M+H]+	Histamine	组胺	Alkaloids	生物碱	Alkaloids	生物碱	51-45-6	3	19970.9	82832.2	80557.5	72428.1	C00388	ko00340,ko01100,ko01110
Lmhp007598	534.355	184.073	533.348	C27H52NO7P	[M+H]+	LysoPC 19:2(2n isomer)	溶血磷脂酰胆碱 19:2(2n异构)	Lipids	脂质	LPC	溶血磷脂酰胆碱	-	3	19824.6	72957.1	94232.2	70316.1	-	-
pme1109	152.057	135.03	151.049	C5H5N5O	[M+H]+	Guanine	鸟嘌呤	Nucleotides and derivatives	核苷酸及其衍生物	Nucleotides and derivatives	核苷酸及其衍生物	73-40-5	2	19682.2	843947	823219	870831	C00242	ko00230,ko01100,ko01232
mws5041	189.123	86.0964	188.116	C8H16N2O3	[M+H]+	L-Glycyl-L-isoleucine*	L-甘氨酰-L-异亮氨酸*	Amino acids and derivatives	氨基酸及其衍生物	Amino acids and derivatives	氨基酸及其衍生物	19461-38-2	3	19627.6	127022	133902	123645	-	-
Lmgn001670	137.027	108.023	138.032	C7H6O3	[M-H]-	Salicylic acid	水杨酸	Phenolic acids	酚酸类	Phenolic acids	酚酸类	69-72-7	1	19533.8	246015	261582	282342	C00805	ko00996,ko01100,ko01110,ko04075
Lmhp001670	231.17	72.0808	230.163	C11H22N2O3	[M+H]+	L-Valyl-L-Leucine	L-缬氨酰-L-亮氨酸	Amino acids and derivatives	氨基酸及其衍生物	Amino acids and derivatives	氨基酸及其衍生物	3989-97-7	2	19442	334764	322434	318376	-	-
Lmsp004670	595.166	287.057	594.159	C27H30O15	[M+H]+	Kaempferol-3-O-glucoside-7-O-rhamnoside*	山柰酚-3-O-葡萄糖苷-7-O-鼠李糖苷*	Flavonoids	黄酮	Flavonols	黄酮醇	2392-95-2	1	19070.7	8.2151e+06	6.99086e+06	7.37279e+06	-	-
pme3827	198.076	152.071	197.069	C9H11NO4	[M+H]+	3,4-Dihydroxy-L-phenylalanine (L-Dopa)	3,4-二羟基-L-苯丙氨酸 (左旋多巴)	Amino acids and derivatives	氨基酸及其衍生物	Amino acids and derivatives	氨基酸及其衍生物	59-92-7	3	18942.5	117927	88506.4	108558	C00355	ko00350,ko00950,ko00965,ko01100,ko01110
pmb2319	482.324	184.073	481.317	C23H48NO7P	[M+H]+	LysoPC 15:0	溶血磷脂酰胆碱 15:0	Lipids	脂质	LPC	溶血磷脂酰胆碱	108273-89-8	2	18822.3	31021.9	31745.7	28954.9	-	-
MWS201381	292.13	188.071	291.122	C14H17N3O4	[M+H]+	Ser-Trp	L-丝氨酸-L-色氨酸	Amino acids and derivatives	氨基酸及其衍生物	Amino acids and derivatives	氨基酸及其衍生物	94421-70-2	2	18779.2	18619.4	11725.6	18619.4	-	-
Zblp004317	206.082	120.086	205.074	C11H11NO3	[M+H]+	(S)-3-(2-oxopropyl)-3-hydroxyindolin-2-one	(S)-3-(2-氧丙基)-3-羟基吲哚-2-酮	Alkaloids	生物碱	Plumerane	吲哚类生物碱	-	2	18760.2	186641	166720	204464	-	-
Zmhn001883	329.088	209.042	330.095	C14H18O9	[M-H]-	Vanillic acid-4-O-glucoside	香草酸-4-O-葡萄糖苷	Phenolic acids	酚酸类	Phenolic acids	酚酸类	32142-31-7	2	18596.9	45309.3	46755.3	38786.6	-	-
Hmtp000776	168.066	105.034	167.058	C8H9NO3	[M+H]+	4,5,6-Trihydroxy-2-cyclohexen-1-ylideneacetonitrile	4,5,6-三羟基-2-环己烯-1-亚乙乙腈	Alkaloids	生物碱	Alkaloids	生物碱	-	2	18471.1	77241.5	61814.4	59688.8	-	-
mws0677	219.113	160.076	218.106	C12H14N2O2	[M+H]+	N-Acetyl-5-hydroxytryptamine	N-乙酰-5-羟基色胺	Alkaloids	生物碱	Plumerane	吲哚类生物碱	1210-83-9	3	18361	126251	123668	115117	C00978	ko00380,ko01100,ko01110
pmb0801	346.113	184.06	345.106	C14H19NO9	[M+H]+	4-Pyridoxic acid-O-glucoside	4-吡哆酸-O-葡萄糖苷	Others	其它类	Vitamin	维生素	-	3	18314.5	13422.8	9290.91	13426.6	-	-
mws4134	611.145	306.079	612.152	C20H32N6O12S2	[M-H]-	Oxiglutatione	氧化谷胱甘肽	Amino acids and derivatives	氨基酸及其衍生物	Amino acids and derivatives	氨基酸及其衍生物	27025-41-8	3	18186.7	25370	40579.7	35697.9	C00127	ko00480,ko01100,ko01240
pmn001640	449.073	316	450.08	C20H18O12	[M-H]-	Myricetin-3-O-arabinoside	杨梅素-3-O-阿拉伯糖苷	Flavonoids	黄酮	Flavonols	黄酮醇	132679-85-7	3	18147	23060.7	30291.2	25172.9	-	-
Lmhp009590	508.34	184.073	507.332	C25H50NO7P	[M+H]+	LysoPC 17:1	溶血磷脂酰胆碱 17:1	Lipids	脂质	LPC	溶血磷脂酰胆碱	-	1	18007.9	48014.5	45209.1	44029.3	-	-
MWSmce024	355.096	193.047	354.095	C16H18O9	[M+H]+	Scopoletin-7-O-glucoside (Scopolin)	东莨菪内酯-7-O-葡萄糖苷 (东莨菪苷)	Lignans and Coumarins	木脂素和香豆素	Coumarins	香豆素	531-44-2	2	17800.9	1.16219e+06	877765	1.0722e+06	C01527	ko00999,ko01110
Lmbn001981	137.024	93.0346	138.032	C7H6O3	[M-H]-	2,5-Dihydroxybenzaldehyde	2,5-二羟基苯甲醛	Phenolic acids	酚酸类	Phenolic acids	酚酸类	1194-98-5	1	17794.6	1.63301e+06	1.70301e+06	1.6657e+06	C05585	ko00350,ko01100
pme1184	268.104	152.057	267.097	C10H13N5O4	[M+H]+	2'-Deoxyguanosine	2'-脱氧鸟苷	Nucleotides and derivatives	核苷酸及其衍生物	Nucleotides and derivatives	核苷酸及其衍生物	961-07-9	3	17773	959914	810701	814622	C00330	ko00230,ko01100,ko01232,ko02010
Lmhp009129	482.324	184.073	481.317	C23H48NO7P	[M+H]+	LysoPC 15:0(2n isomer)	溶血磷脂酰胆碱 15:0(2n异构)	Lipids	脂质	LPC	溶血磷脂酰胆碱	-	2	17662.1	19837.2	24376.9	20768.4	-	-
pme0170	217.13	158.081	216.122	C8H16N4O3	[M+H]+	N-Acetyl-L-Arginine	N-乙酰-L-精氨酸	Amino acids and derivatives	氨基酸及其衍生物	Amino acids and derivatives	氨基酸及其衍生物	155-84-0	3	17649.4	33279.3	33614.5	31605.5	-	-
mws4002	154.086	137.06	153.079	C8H11NO2	[M+H]+	Dopamine	多巴胺	Alkaloids	生物碱	Phenolamine	酚胺	51-61-6	2	17626	321104	396528	356119	C03758	ko00350,ko00950,ko00965,ko01100,ko01110
MWS201479	239.103	136.076	238.095	C11H14N2O4	[M+H]+	Tyr-Gly	L-酪氨酸-L-甘氨酸	Amino acids and derivatives	氨基酸及其衍生物	Amino acids and derivatives	氨基酸及其衍生物	673-08-5	2	17556	46140.7	40722.4	39637	-	-
mws0983	326.305	62.0601	325.298	C20H39NO2	[M+H]+	N-Oleoylethanolamine	油酰单乙醇胺	Alkaloids	生物碱	Alkaloids	生物碱	111-58-0	1	17309.8	180109	160578	143492	C20792	-
pme1228	221.092	204.065	220.085	C11H12N2O3	[M+H]+	5-Hydroxy-L-tryptophan	5-羟基-L-色氨酸	Amino acids and derivatives	氨基酸及其衍生物	Amino acids and derivatives	氨基酸及其衍生物	56-69-9	3	17252.4	28344.7	26498.8	28300.5	C00643	ko00380,ko01100
MWSHY0080	595.166	287.058	594.159	C27H30O15	[M+H]+	Luteolin-7-O-neohesperidoside (Lonicerin)*	木犀草素-7-O-新橘皮糖苷 (忍冬苷)*	Flavonoids	黄酮	Flavones	黄酮	25694-72-8	1	17164.2	7.0946e+06	8.26987e+06	7.47153e+06	C12630	ko00944
mws5042	223.108	120.088	222.1	C11H14N2O3	[M+H]+	L-Glycyl-L-phenylalanine	L-甘氨酰-L-苯丙氨酸	Amino acids and derivatives	氨基酸及其衍生物	Amino acids and derivatives	氨基酸及其衍生物	721-66-4	3	17004.8	203167	191601	199064	-	-
Lmbn001162	339.074	177.023	340.079	C15H16O9	[M-H]-	Esculetin-7-O-glucoside	秦皮乙素-7-O-葡萄糖苷	Lignans and Coumarins	木脂素和香豆素	Coumarins	香豆素	-	1	16972.9	4.68114e+06	4.3208e+06	4.4684e+06	-	-
Lmmn009170	455.353	455.353	456.36	C30H48O3	[M-H]-	3-Hydroxy-9,19-cyclolanost-24-en-26-oic acid (Mangiferolic acid)	3-羟基-9,19-环羊毛甾-24-烯-26-酸 (杧果醇酸)	Terpenoids	萜类	Triterpene	三萜	4184-34-3	1	16935.5	1.94086e+06	1.85482e+06	1.78039e+06	-	-
Lmmn002179	313.093	107.05	314.1	C14H18O8	[M-H]-	Methyl salicylate-2-O-glucoside	水杨酸甲酯-2-O-葡萄糖苷	Phenolic acids	酚酸类	Phenolic acids	酚酸类	10019-60-0	2	16793.3	135973	127366	139474	-	-
Lmmp003109	305.102	139.037	304.095	C16H16O6	[M+H]+	3'-O-Methyl-epicatechin	3'-甲氧基-表儿茶素	Flavonoids	黄酮	Flavanols	黄烷醇类	76549-34-3	2	16733.7	49095.7	51868.7	59143.7	-	-
Hmqp005411	297.243	81.07	296.235	C18H32O3	[M+H]+	9-Oxo-12Z-Octadecenoic acid	9-氧代-12Z-十八碳烯酸	Lipids	脂质	Free fatty acids	游离脂肪酸	112543-32-5	2	16494.7	98138	90431.3	86477.9	-	-
mws1610	471.348	471.348	472.355	C30H48O4	[M-H]-	2,3-Dihydroxyurs-12-en-29-oic acid (Maslinic acid)	2,3-二羟基熊果-12-烯-29-酸 (山楂酸)	Terpenoids	萜类	Triterpene	三萜	4373-41-5	2	15947.1	754179	642404	727834	C16939	-
Lmhp008718	506.324	184.073	505.317	C25H48NO7P	[M+H]+	LysoPC 17:2	溶血磷脂酰胆碱 17:2	Lipids	脂质	LPC	溶血磷脂酰胆碱	-	2	15717.7	106849	89663.1	82932.8	-	-
Zbzn005452	181.05	135.047	182.058	C9H10O4	[M-H]-	4-Hydroxyphenyllactic Acid	4-羟苯基乳酸	Phenolic acids	酚酸类	Phenolic acids	酚酸类	306-23-0	2	15632.1	105621	107814	108320	C03672	-
mws0042	305.067	125.025	306.074	C15H14O7	[M-H]-	Epigallocatechin	表没食子儿茶素	Flavonoids	黄酮	Flavanols	黄烷醇类	970-74-1	1	15538.5	2.41691e+06	2.3022e+06	2.26184e+06	C12136	ko00941,ko01110
mws2523	421.075	241.012	422.082	C12H23O14P	[M-H]-	Trehalose 6-phosphate	海藻糖-6-磷酸	Others	其它类	Saccharides	糖类	4484-88-2	3	15496.4	36347.7	35765.6	36608.3	C00689	ko00500,ko01100,ko01110
Lmlp003161	265.155	177.062	264.147	C14H20N2O3	[M+H]+	N-Feruloylputrescine	阿魏酰腐胺	Alkaloids	生物碱	Phenolamine	酚胺	501-13-3	2	15208.9	2.477e+07	2.09018e+07	2.40181e+07	C10497	ko00330,ko01100
Lmhp002031	245.186	86.0954	244.179	C12H24N2O3	[M+H]+	L-Leucyl-L-Leucine	L-亮氨酰-L-亮氨酸	Amino acids and derivatives	氨基酸及其衍生物	Amino acids and derivatives	氨基酸及其衍生物	3303-31-9	2	15138.5	136733	118165	124791	-	-
mws0361	253.217	235.207	254.225	C16H30O2	[M-H]-	Palmitoleic Acid	棕榈油酸	Lipids	脂质	Free fatty acids	游离脂肪酸	373-49-9	1	14931.9	71362.5	62732.2	67223.6	C08362	ko00061,ko01100
pmn001706	471.348	471.35	472.355	C30H48O4	[M-H]-	2,3-Dihydroxyolean-12-en-28-oic acid (2-Hydroxyoleanolic acid)	2,3-二羟基齐墩果-12-烯-28-酸 (2-羟基齐墩果酸)	Terpenoids	萜类	Triterpene	三萜	26707-60-8	3	14771.9	630178	557190	609387	-	-
MWSHY0132	449.108	303.05	448.101	C21H20O11	[M+H]+	Quercetin-3-O-rhamnoside(Quercitrin)	槲皮素-3-O-鼠李糖苷(槲皮苷)	Flavonoids	黄酮	Flavonols	黄酮醇	522-12-3	1	14710.2	3.46567e+07	3.52067e+07	3.31576e+07	C01750	ko00944
mws5035	279.17	120.085	278.163	C15H22N2O3	[M+H]+	L-Leucyl-L-phenylalanine	L-亮氨酰-L-苯丙氨酸	Amino acids and derivatives	氨基酸及其衍生物	Amino acids and derivatives	氨基酸及其衍生物	56217-82-4	3	14593.3	49146.2	102079	80939.8	-	-
Zmyn004714	297.245	183.14	298.251	C18H34O3	[M-H]-	Ricinoleic acid	蓖麻油酸	Lipids	脂质	Free fatty acids	游离脂肪酸	141-22-0	3	14471.7	51616	52956.1	49408.5	C08365	-
Wagp002530	177.055	117.033	176.047	C10H8O3	[M+H]+	2-Methoxy-1-benzofuran-5-carbaldehyde	2-甲氧基-1-苯并呋喃-5-甲醛	Others	其它类	Others	其它	-	2	14432.5	6.71224e+06	5.53321e+06	7.06963e+06	-	-
pmb0782	86.0964	69.0698	85.0891	C5H11N	[M+H]+	Piperidine	哌啶	Alkaloids	生物碱	Piperidine alkaloids	哌啶类生物碱	110-89-4	3	14240	430730	417302	360952	C01746	ko00960
Lmbn007891	313.238	183.14	314.246	C18H34O4	[M-H]-	Hydroxy ricinoleic acid	羟基蓖麻油酸	Lipids	脂质	Free fatty acids	游离脂肪酸	-	3	14164.6	144082	137045	138067	-	-
pmc0960	544.34	184.073	543.332	C28H50NO7P	[M+H]+	LysoPC 20:4	溶血磷脂酰胆碱 20:4	Lipids	脂质	LPC	溶血磷脂酰胆碱	-	3	14119.1	43432	40640.3	40638.6	-	-
pme0500	503.162	323.098	504.169	C18H32O16	[M-H]-	D-Melezitose	D-松三糖	Others	其它类	Saccharides	糖类	597-12-6	2	13932.3	61255.7	76112.2	75698.9	C08243	-
MWSslk160	633.074	301.001	634.081	C27H22O18	[M-H]-	Corilagin	鞣料云实素	Tannins	鞣质	Tannin	鞣质	23094-69-1	2	13642.7	306553	221710	227700	C10219	-
mws1094	287.056	259.065	288.063	C15H12O6	[M-H]-	Aromadendrin (Dihydrokaempferol)	香橙素 (二氢山柰酚)	Flavonoids	黄酮	Flavanonols	二氢黄酮醇	480-20-6	1	13616.4	28885.4	23474.8	29701.8	C00974	ko00941,ko01100,ko01110
pme2566	217.083	199.072	218.09	C8H14N2O5	[M-H]-	5-L-Glutamyl-L-amino acid	5-L-谷氨酰-L-氨基酸	Amino acids and derivatives	氨基酸及其衍生物	Amino acids and derivatives	氨基酸及其衍生物	5875-41-2	3	13538.5	1.63448e+06	1.69604e+06	1.78865e+06	-	-
Zmhn001446	579.208	417.156	580.216	C28H36O13	[M-H]-	Syringaresinol-4'-O-glucoside	丁香树脂酚-4'-O-葡萄糖苷	Lignans and Coumarins	木脂素和香豆素	Lignans	木脂素	7374-79-0	1	13379.2	164028	174058	181062	C10890	-
pmb0492	584.275	325	583.268	C34H37N3O6	[M+H]+	N',N'',N'''-p-Coumaroyl-cinnamoyl-caffeoyl spermidine	N',N'',N'''-对香豆酰肉桂酰咖啡酰亚精胺	Alkaloids	生物碱	Phenolamine	酚胺	-	3	12713.2	16769.2	14087.2	15199.4	-	-
Lmzn106284	471.348	471.348	472.355	C30H48O4	[M-H]-	2,3-Dihydroxylup-20(29)-en-28-oic acid (Alphitolic acid)	2,3-二羟基羽扇豆-20(29)-烯-28-酸 (麦珠子酸)	Terpenoids	萜类	Triterpene	三萜	19533-92-7	2	12560.8	644668	533176	593466	C16912	-
pmb2260	480.308	184.073	479.301	C23H46NO7P	[M+H]+	LysoPC 15:1	溶血磷脂酰胆碱 15:1	Lipids	脂质	LPC	溶血磷脂酰胆碱	-	3	12357	19232	13515.3	12461	-	-
HJN110	455.359	455.359	456.36	C30H48O3	[M-H]-	3-Hydroxylup-20(29)-en-28-oic acid (Betulinic acid)	3-羟基羽扇豆-20(29)-烯-28-酸 (白桦脂酸)	Terpenoids	萜类	Triterpene	三萜	472-15-1	1	12208.8	2.00889e+06	1.90227e+06	1.85025e+06	C08619	-
NK10246260	162.055	116.049	161.048	C9H7NO2	[M+H]+	2,4-Dihydroxyquinoline	2,4-二羟基喹啉	Alkaloids	生物碱	Quinoline alkaloids	喹啉类生物碱	86-95-3	3	12099.7	153813	136869	199806	C16716	ko00996
MWSmce203	341.117	73.0319	342.116	C12H22O11	[M-H]-	D-Cellobiose	D-纤维二糖	Others	其它类	Saccharides	糖类	528-50-7	3	12064	24697	17903.7	20885.2	-	-
pmb2789	309.207	209.054	310.214	C18H30O4	[M-H]-	13S-Hydroperoxy-6Z,9Z,11E-octadecatrienoic acid	13-氢过氧化-6Z,9Z,11E-十八碳三烯酸	Lipids	脂质	Free fatty acids	游离脂肪酸	121107-97-9	3	11933.5	40088	40328.2	37919.4	-	-
mws1389	455.353	455.353	456.36	C30H48O3	[M-H]-	3-Hydroxyolean-12-en-28-oic acid (Oleanolic acid)	3-羟基齐墩果-12-烯-28-酸 (齐墩果酸)	Terpenoids	萜类	Triterpene	三萜	508-02-1	3	11929.1	1.90074e+06	1.92244e+06	1.80703e+06	C17148	-
pme2266	245.095	227.085	244.088	C10H16N2O3S	[M+H]+	Biotin	D-生物素	Others	其它类	Vitamin	维生素	58-85-5	3	11860	64998	29936.3	31799.4	C00120	ko00780,ko01100,ko01240,ko02010
Xmyp005654	449.106	287.056	448.101	C21H20O11	[M+H]+	Kaempferol-4'-O-glucoside*	山柰酚-4'-O-葡萄糖苷*	Flavonoids	黄酮	Flavonols	黄酮醇	-	1	11832.9	3.22634e+06	3.02478e+06	3.45671e+06	-	-
mws4053	455.353	455.353	456.36	C30H48O3	[M-H]-	3-Hydroxyurs-12-en-28-oic acid (Ursolic acid)	3-羟基熊果-12-烯-28-酸 (熊果酸)	Terpenoids	萜类	Triterpene	三萜	77-52-1	2	11770	1.89207e+06	1.90599e+06	1.80753e+06	C08988	-
MWS1900	215.129	153.127	216.136	C11H20O4	[M-H]-	Undecanedioic acid	十一烷二酸	Lipids	脂质	Free fatty acids	游离脂肪酸	1852-04-6	3	11749.8	39565.7	34661.3	36391.7	-	-
pmn001644	519.078	300	520.085	C23H20O14	[M-H]-	Quercetin-3-O-(2''-O-acetyl)glucuronide	槲皮素-3-O-(2''-O-乙酰)葡萄糖醛酸苷	Flavonoids	黄酮	Flavonols	黄酮醇	-	3	11736.8	22243.2	24299	24476.3	-	-
pmb0034	277.103	148.06	276.096	C10H16N2O7	[M+H]+	L-α-Glutamyl-L-Glutamic Acid	L-谷氨酰-L-谷氨酸	Amino acids and derivatives	氨基酸及其衍生物	Amino acids and derivatives	氨基酸及其衍生物	3929-61-1	3	11729	18407.5	18410.7	21681.3	C01425	-
pmb2620	207.066	133.065	208.074	C11H12O4	[M-H]-	3,4-Dimethoxycinnamic acid	3,4-二甲氧基肉桂酸	Phenolic acids	酚酸类	Phenolic acids	酚酸类	2316-26-9	3	11720.4	12184.7	15242.3	14279	-	-
Lmrj002087	247.129	86.09	246.122	C10H18N2O5	[M+H]+	L-Isoleucyl-L-Aspartate	L-异亮氨酰-L-天冬氨酸	Amino acids and derivatives	氨基酸及其衍生物	Amino acids and derivatives	氨基酸及其衍生物	-	3	11478.4	142848	148323	154400	-	-
mws1015	339.072	177.019	340.079	C15H16O9	[M-H]-	Esculin (6,7-Dihydroxycoumarin-6-O-glucoside)	秦皮甲素; 6,7-二羟基香豆素-6-O-葡萄糖苷	Lignans and Coumarins	木脂素和香豆素	Coumarins	香豆素	531-75-9	1	11429.4	2.71174e+06	2.63124e+06	2.36566e+06	C09264	-
pme0368	579.171	271.036	578.164	C27H30O14	[M+H]+	Apigenin-7-O-rutinoside (Isorhoifolin)	芹菜素-7-O-芸香糖苷 (异野漆树苷)	Flavonoids	黄酮	Flavones	黄酮	552-57-8	3	11319.5	463178	297693	317107	-	-
pme3443	207.066	192.041	208.074	C11H12O4	[M-H]-	Sinapinaldehyde	芥子醛	Phenolic acids	酚酸类	Phenolic acids	酚酸类	4206-58-0	1	11185.7	100352	112300	99174.4	C05610	ko00940,ko01100,ko01110
Rfmb087	311.223	293.213	312.23	C18H32O4	[M-H]-	9-Hydroxy-13-oxo-10-octadecenoic Acid	9-羟基-13-氧代-10-十八碳烯酸	Lipids	脂质	Free fatty acids	游离脂肪酸	-	3	10802.1	56913.1	57125.4	56649	-	-
Lmhp012042	355.284	263.237	354.277	C21H38O4	[M+H]+	2-Linoleoylglycerol*	2-亚油酰甘油酯*	Lipids	脂质	Glycerol ester	甘油酯	3443-82-1	3	10678.4	218974	198044	208400	-	-
mws2118	435.13	167.035	436.137	C21H24O10	[M-H]-	Phloretin-2'-O-glucoside (Phlorizin)	根皮苷	Flavonoids	黄酮	Chalcones	查耳酮	60-81-1	3	10510.9	189982	183793	171118	C01604	ko00941,ko01110
HJAP148	581.148	287.059	580.143	C26H28O15	[M+H]+	Kaempferol-3-O-sambubioside	山柰酚-3-O-桑布双糖苷	Flavonoids	黄酮	Flavonols	黄酮醇	27661-51-4	1	10414.2	1.3109e+07	1.13544e+07	9.38412e+06	-	-
Zmjn004133	311.223	293.214	312.23	C18H32O4	[M-H]-	9S-Hydroperoxy-10E,12Z-octadecadienoic acid	9S-氢过氧-10E,12Z-十八碳二烯酸	Lipids	脂质	Free fatty acids	游离脂肪酸	5502-91-0	3	10405.7	69989.5	73918.3	72705.7	C14827	ko00591,ko01100
pmb0883	482.324	341.305	481.317	C23H48NO7P	[M+H]+	LysoPE 18:0	溶血磷脂酰乙醇胺 18:0	Lipids	脂质	LPE	溶血磷脂酰乙醇胺	69747-55-3	3	10052.1	70547.3	72136.9	68026.6	-	-
Lmbn006152	279.233	59.0133	280.24	C18H32O2	[M-H]-	(9Z,11E)-Octadecadienoic acid	(9Z,11E)-十八碳二烯酸	Lipids	脂质	Free fatty acids	游离脂肪酸	2540-56-9	1	9963.16	145272	129705	141539	C04056	ko00591
mws1491	279.233	59.0139	280.24	C18H32O2	[M-H]-	Linoleic acid	亚油酸	Lipids	脂质	Free fatty acids	游离脂肪酸	60-33-3	1	9963.16	145272	129705	141539	C01595	ko00591,ko01040,ko01100
Zblp001009	272.114	110.06	271.106	C12H17NO6	[M+H]+	3-pyridine-methanol-O-β-D-glucopyranosyl	3-吡啶-甲醇-O-β-D-吡喃葡萄糖基	Alkaloids	生物碱	Pyridine alkaloids	吡啶类生物碱	-	2	9928.14	173450	175570	170113	-	-
MWSslk138	169.015	151.004	170.022	C7H6O5	[M-H]-	2,3,4-Trihydroxybenzoic acid	2,3,4-三羟基苯甲酸	Phenolic acids	酚酸类	Phenolic acids	酚酸类	610-02-6	2	9898.8	1.51481e+06	1.63296e+06	1.45138e+06	-	-
pmf0297	297.316	183.211	298.324	C20H42O	[M-H]-	1-Eicosanol	正二十醇	Lipids	脂质	Free fatty acids	游离脂肪酸	629-96-9	3	9756.76	47918.6	47996.3	43094.9	-	-
MWS80006	311.223	293.214	312.23	C18H32O4	[M-H]-	9-Hydroperoxy-9Z,11E-Octadecadienoic Acid	9-过氧化羟基-9Z,11E-十八碳二烯酸	Lipids	脂质	Free fatty acids	游离脂肪酸	-	2	9661.14	11811.2	14242.6	12422.5	-	-
mws1195	179.07	147.044	178.063	C10H10O3	[M+H]+	p-Coumaric acid methyl ester	对香豆酸甲酯	Phenolic acids	酚酸类	Phenolic acids	酚酸类	3943-97-3	3	9612.55	51734.6	49600.3	47782	-	-
pme1261	206.139	76.0757	205.131	C9H19NO4	[M+H]+	D-Panthenol	D-泛酰醇	Others	其它类	Saccharides	糖类	81-13-0	1	9610.14	27194.9	21074.8	21532.8	C05944	ko00770
Zmgn002106	206.084	58.0299	207.089	C11H13NO3	[M-H]-	N-Acetyl-L-phenylalanine	N-乙酰-L-苯丙氨酸	Amino acids and derivatives	氨基酸及其衍生物	Amino acids and derivatives	氨基酸及其衍生物	2018-61-3	1	9593.4	110562	120461	112353	C03519	ko00360,ko01100
Lmgp004474	579.171	271.06	578.164	C27H30O14	[M+H]+	Genistein-7-O-galactoside-rhamnose	染料木素-7-O-半乳糖苷-鼠李糖	Flavonoids	黄酮	Isoflavones	异黄酮	-	2	9538.22	368064	273563	323132	-	-
Zbzp007301	293.209	55.0541	292.204	C18H28O3	[M+H]+	2-Methoxy-6-undecyl-1,4-benzoquinone	2-甲氧基-6-十一烷基-1,4-苯醌	Quinones	醌类	Quinones	醌类	-	2	9389.42	132139	120081	125133	-	-
MWSslk133	257.177	195.178	258.183	C14H26O4	[M-H]-	1,14-Tetradecanedioic Acid	1,14-十四烷二酸	Lipids	脂质	Free fatty acids	游离脂肪酸	821-38-5	3	9300.44	35333	32612	31796.6	-	-
Lmhp002001	265.155	72.0813	264.147	C14H20N2O3	[M+H]+	L-Valyl-L-Phenylalanine	L-缬氨酰-L-苯丙氨酸	Amino acids and derivatives	氨基酸及其衍生物	Amino acids and derivatives	氨基酸及其衍生物	3918-92-1	2	9239.34	178673	181886	198868	-	-
pmf0348	187.134	97.0648	188.141	C10H20O3	[M-H]-	2,6-Dimethyl-7-octene-2,3,6-triol	2,6-二甲基-7-辛烯-2,3,6-三醇	Others	其它类	Saccharides	糖类	73815-21-1	3	9211.32	822946	816782	826235	-	-
pmb0197	298.115	166.072	297.107	C11H15N5O5	[M+H]+	N7-Methylguanosine	N7-甲基鸟苷	Nucleotides and derivatives	核苷酸及其衍生物	Nucleotides and derivatives	核苷酸及其衍生物	20244-86-4	3	9188.47	55877.1	38276.9	48777.8	C20674	-
Lhhp120814	165.09	91.0542	164.084	C10H12O2	[M+H]+	Eugenol	丁子香酚	Phenolic acids	酚酸类	Phenolic acids	酚酸类	97-53-0	2	9103.94	72114.7	50851.2	56407.8	C10453	ko00940
Hmpp003270	449.108	287.05	448.101	C21H20O11	[M+H]+	Luteolin-4'-O-glucoside	木犀草素-4'-O-葡萄糖苷	Flavonoids	黄酮	Flavones	黄酮	6920-38-3	1	9103.94	3.13846e+06	3.18603e+06	2.90541e+06	-	-
YC512118	282.279	247.243	281.272	C18H35NO	[M+H]+	Oleamide (9-Octadecenamide)	油酸酰胺 (9-十八碳烯酰胺)	Lipids	脂质	Free fatty acids	游离脂肪酸	301-02-0	2	9043.36	169230	142273	146455	C19670	-
Hmjn004446	593.13	285.04	594.137	C30H26O13	[M-H]-	Luteolin-7-O-(6''-caffeoyl)rhamnoside	木犀草素-7-O-(6''-咖啡酰)鼠李糖苷	Flavonoids	黄酮	Flavones	黄酮	-	3	8978.63	11290.1	11084.1	10023.7	-	-
mws1290	593.13	285.041	594.137	C30H26O13	[M-H]-	Kaempferol-3-O-(6''-p-Coumaroyl)glucoside (Tiliroside)	山柰酚-3-O-(6''-对香豆酰)葡萄糖苷 (银锻苷)	Flavonoids	黄酮	Flavonols	黄酮醇	20316-62-5	3	8978.63	11290.1	11084.1	10023.7	C17140	-
Zmhn002301	325.093	163.039	326.1	C15H18O8	[M-H]-	p-Coumaric acid-4-O-glucoside*	对香豆酸-4-O-葡萄糖苷*	Phenolic acids	酚酸类	Phenolic acids	酚酸类	117405-48-8	1	8939.33	6.24324e+06	6.09843e+06	6.11038e+06	C06739	-
mws1526	359.134	197.081	358.126	C16H22O9	[M+H]+	Sweroside	獐牙菜苷	Terpenoids	萜类	Monoterpenoids	倍萜	14215-86-2	3	8904.41	363719	338149	316055	C17071	-
Lmbn005923	277.217	59.0139	278.225	C18H30O2	[M-H]-	Crepenynic acid	顺式十八碳-9-烯-12-炔酸	Lipids	脂质	Free fatty acids	游离脂肪酸	2277-31-8	2	8692.4	438356	422752	402310	C07289	ko00591
pmb0496	307.176	177.055	306.169	C15H22N4O3	[M+H]+	N-Feruloylagmatine	N-阿魏酰胍丁胺	Alkaloids	生物碱	Phenolamine	酚胺	-	3	8643.84	106009	107366	103837	C18325	ko00330,ko01100
pmp000589	551.103	303.051	550.096	C24H22O15	[M+H]+	Quercetin-7-O-(6''-malonyl)glucoside	槲皮素-7-O-(6''-丙二酰)葡萄糖苷	Flavonoids	黄酮	Flavonols	黄酮醇	-	1	8491.54	217261	196570	147625	-	-
Lmhp008273	438.262	297.242	437.254	C20H40NO7P	[M+H]+	LysoPE 15:1(2n isomer)	溶血磷脂酰乙醇胺 15:1(2n异构)	Lipids	脂质	LPE	溶血磷脂酰乙醇胺	-	3	8275.52	11358.7	11254.1	10742.3	-	-
pmb2791	309.207	209.054	310.214	C18H30O4	[M-H]-	9-Hydroperoxy-10E,12,15Z-octadecatrienoic acid	9-羟基过氧-10E,12,15Z-十八碳三烯酸	Lipids	脂质	Free fatty acids	游离脂肪酸	111004-08-1	3	8180.84	33109.2	29738.3	33531	C16321	ko00592,ko01110
Lmhn002926	279.05	163.04	280.058	C13H12O7	[M-H]-	p-Coumaroylmalic acid	对香豆酰苹果酸	Phenolic acids	酚酸类	Phenolic acids	酚酸类	-	1	8101.98	137747	142420	114822	-	-
Hmmp002121	469.121	317.08	468.069	C23H16O11	[M+H]+	Isorhamnetin-3-O-gallate	异鼠李素-3-O-没食子酸酯	Flavonoids	黄酮	Flavonols	黄酮醇	-	3	8093.42	595852	586502	644068	-	-
Wbtn007603	299.056	284.032	300.063	C16H12O6	[M-H]-	9,11-dimethoxy-2h-[1,3]dioxolo[4,5-b]xanthen-10-one	9,11-二甲氧基-2h-[1,3]二氧基[4,5-b]-10-蒽酮	Flavonoids	黄酮	Other Flavonoids	其它类黄酮	-	1	8091.19	2.05172e+06	1.99758e+06	1.83496e+06	-	-
Zmjp003291	595.168	433.116	594.159	C27H30O15	[M+H]+	Vitexin-2''-O-galactoside	牡荆素-2''-O-半乳糖苷	Flavonoids	黄酮	Flavones	黄酮	-	2	8042.72	114345	112393	104506	-	-
Lmhp011388	353.269	261.221	352.261	C21H36O4	[M+H]+	2-α-Linolenoyl-glycerol*	2-α-亚麻酸甘油酯*	Lipids	脂质	Glycerol ester	甘油酯	55268-58-1	2	8007.34	436926	392401	431784	-	-
pmb0532	349.054	137.046	348.047	C10H13N4O8P	[M+H]+	Inosine 5'-monophosphate	5'-肌苷酸	Nucleotides and derivatives	核苷酸及其衍生物	Nucleotides and derivatives	核苷酸及其衍生物	131-99-7	3	7926.57	13422.3	9235.54	12417	C00130	ko00230,ko01100,ko01110,ko01232,ko01240
Hmqn003054	329.235	311.221	330.241	C18H34O5	[M-H]-	9,10,11-Trihydroxy-12-octadecenoic acid	9,10,11-三羟基-12-十八碳烯酸	Lipids	脂质	Free fatty acids	游离脂肪酸	61911-67-9	1	7926.38	189853	191042	185240	-	-
Lmqn000780	606.076	384.985	607.082	C17H27N3O17P2	[M-H]-	Uridine 5'-diphospho-N-acetylglucosamine	尿苷二磷酸乙酰葡萄糖胺	Nucleotides and derivatives	核苷酸及其衍生物	Nucleotides and derivatives	核苷酸及其衍生物	528-04-1	3	7728.46	10870	10387.7	10098.4	C00043	ko00520,ko00524,ko01100,ko01250
pmp000194	519.113	271.061	518.106	C24H22O13	[M+H]+	6''-O-Malonylgenistin	6''-O-丙二酰染料木苷	Flavonoids	黄酮	Isoflavones	异黄酮	51011-05-3	3	7715.99	1.94159e+07	1.64312e+07	1.68796e+07	C16192	ko00943
mws0458	151.04	136.017	152.047	C8H8O3	[M-H]-	Vanillin; 4-Hydroxy-3-Methoxybenzaldehyde	香草醛; 4-羟基-3-甲氧基苯甲醛	Phenolic acids	酚酸类	Phenolic acids	酚酸类	121-33-5	3	7673.2	18538.2	24860.7	17614.2	C00755	ko00996,ko01100,ko01110
MWSmce632	195.065	93.0339	194.058	C10H10O4	[M+H]+	Vanillin acetate	香兰素乙酸酯	Phenolic acids	酚酸类	Phenolic acids	酚酸类	881-68-5	2	7563.56	270469	164723	248677	-	-
Hmqp003184	667.15	287.062	666.143	C29H30O18	[M+H]+	Luteolin-7-O-(6''-malonyl)glucoside-5-O-arabinoside	木犀草素-7-O-(6''-丙二酰)葡萄糖苷-5-O-阿拉伯糖苷	Flavonoids	黄酮	Flavones	黄酮	-	2	7533.65	8.54994e+06	7.50821e+06	8.42473e+06	-	-
pme1286	385.129	250	384.122	C14H20N6O5S	[M+H]+	S-(5'-Adenosy)-L-homocysteine	S-(5-腺苷)-L-高半胱氨酸	Amino acids and derivatives	氨基酸及其衍生物	Amino acids and derivatives	氨基酸及其衍生物	979-92-0	3	7492.86	34867.3	26506.4	40340.8	C00021	ko00270,ko01100,ko01230,ko01240
pmn001583	609.146	300.029	610.153	C27H30O16	[M-H]-	Quercetin-3-O-robinobioside	槲皮素-3-O-洋槐糖苷	Flavonoids	黄酮	Flavonols	黄酮醇	52525-35-6	3	7382.95	1.9399e+06	1.6093e+06	1.6138e+06	-	-
pmp001310	627.156	303.1	626.148	C27H30O17	[M+H]+	6-Hydroxykaempferol-3,6-O-Diglucoside	6-羟基山柰酚-3,6-O-二葡萄糖苷	Flavonoids	黄酮	Flavonols	黄酮醇	-	2	6964.32	1.52286e+06	1.4482e+06	1.34649e+06	-	-
mws0043	403.139	373.096	402.132	C21H22O8	[M+H]+	Nobiletin (5,6,7,8,3',4'-Hexamethoxyflavone)	川陈皮素 (5,6,7,8,3',4'-六甲氧基黄酮)	Flavonoids	黄酮	Flavones	黄酮	478-01-3	3	6961.42	10035.2	12088.8	10829.1	C10112	-
mws0473	131.035	87.0452	132.042	C5H8O4	[M-H]-	2-Methylsuccinic acid	2-甲基丁二酸	Organic acids	有机酸	Organic acids	有机酸	498-21-5	3	6940.58	50939.5	57703.6	61789.1	-	-
Lmmn000806	131.035	87.0459	132.042	C5H8O4	[M-H]-	Dimethylmalonic acid	二甲基丙二酸	Organic acids	有机酸	Organic acids	有机酸	595-46-0	3	6940.58	50939.5	57703.6	61789.1	-	-
Lmmn002164	131.035	87.0452	132.042	C5H8O4	[M-H]-	Monomethyl succinate	琥珀酸单甲酯	Organic acids	有机酸	Organic acids	有机酸	3878-55-5	3	6940.58	50939.5	57703.6	61789.1	-	-
Lmbn001467	158.082	116.072	159.089	C7H13NO3	[M-H]-	5-Acetamidopentanoic Acid	5-乙酰氨基戊酸	Organic acids	有机酸	Organic acids	有机酸	1072-10-2	3	6926.2	181777	186437	198900	C03087	ko00310,ko01100
pmb0863	492.308	184.073	491.301	C24H46NO7P	[M+H]+	LysoPC 16:2(2n isomer)	溶血磷脂酰胆碱 16:2(2n异构)	Lipids	脂质	LPC	溶血磷脂酰胆碱	-	3	6105.52	22528.3	21753.2	21691.2	-	-
pmb2591	245.093	203.084	246.1	C13H14N2O3	[M-H]-	N-Acetyl-L-Tryptophan	N-乙酰-L-色氨酸	Amino acids and derivatives	氨基酸及其衍生物	Amino acids and derivatives	氨基酸及其衍生物	1218-34-4	3	6068.6	605828	551676	542352	-	-
MWS5083	455.097	96.9685	456.105	C17H21N4O9P	[M-H]-	Flavin Single Nucleotide(FMN)	黄素单核苷酸(FMN)	Nucleotides and derivatives	核苷酸及其衍生物	Nucleotides and derivatives	核苷酸及其衍生物	6184-17-4	3	6014.67	21724.1	34055.4	24563.5	C00061	ko00190,ko00740,ko01100,ko01110,ko01240
Lmbp002962	209.047	194.024	208.037	C10H8O5	[M+H]+	Isofraxetin	异秦皮素	Lignans and Coumarins	木脂素和香豆素	Coumarins	香豆素	50656-75-2	1	5991.92	1.04367e+06	909566	1.10546e+06	-	-
Lmsp004301	451.123	289.071	450.116	C21H22O11	[M+H]+	3',5,5',7-Tetrahydroxyflavanone-7-O-glucoside	3',5,5',7-四羟基黄烷酮-7-O-β-D-葡萄糖苷	Flavonoids	黄酮	Flavanones	二氢黄酮	-	2	5939.93	466665	556671	397960	-	-
mws0057	451.123	289.07	450.116	C21H22O11	[M+H]+	Eriodictyol-7-O-glucoside	圣草酚-7-O-葡萄糖苷	Flavonoids	黄酮	Flavanones	二氢黄酮	38965-51-4	2	5939.93	466665	556671	397960	-	-
Zmjp004852	509.128	347.076	508.122	C23H24O13	[M+H]+	5,6,3',4'-Tetrahydroxy-3,7-dimethoxyflavone-6-O-glucoside	5,6,3',4'-四羟基-3,7-二甲氧基黄酮-6-O-葡萄糖苷	Flavonoids	黄酮	Flavones	黄酮	-	1	5916.57	811283	900558	798282	-	-
MWSmce689	293.248	95.0855	292.24	C19H32O2	[M+H]+	Methyl linolenate	亚麻酸甲酯	Lipids	脂质	Free fatty acids	游离脂肪酸	301-00-8	3	5872.42	189384	174926	167462	-	-
Lmmp004504	287.056	153.019	286.048	C15H10O6	[M+H]+	2'-Hydroxygenistein	2'-羟基染料木素	Flavonoids	黄酮	Isoflavones	异黄酮	1156-78-1	3	5850.76	736788	733364	730044	C12134	ko00943
Zmhp003514	301.072	286.054	300.063	C16H12O6	[M+H]+	6,7,8-Tetrahydroxy-5-methoxyflavone	6,7,8-三羟基-5-甲氧基黄酮	Flavonoids	黄酮	Flavones	黄酮	-	3	5803.66	953138	926463	833350	-	-
pmn001384	515.12	353.088	516.127	C25H24O12	[M-H]-	Isochlorogenic acid C	异绿原酸 C	Phenolic acids	酚酸类	Phenolic acids	酚酸类	57378-72-0	1	5798.9	1.06178e+07	8.98258e+06	8.63795e+06	-	-
pmp000087	269.102	177.055	268.095	C13H16O6	[M+H]+	2-Feruloyl-sn-glycerol*	2-阿魏酰-sn-甘油*	Phenolic acids	酚酸类	Phenolic acids	酚酸类	-	3	5751.08	46349.8	23127.9	33848.9	-	-
Wmhp000055	169.049	65.038	168.042	C8H8O4	[M+H]+	2,5-Dimethoxybenzoquinone	2,5-二甲氧基苯醌	Quinones	醌类	Quinones	醌类	3117-03-1	2	5721.86	355510	352047	357602	-	-
pmp000695	375.129	177.051	374.121	C16H22O10	[M+H]+	Swertiamarin	獐牙菜苦苷	Terpenoids	萜类	Monoterpenoids	倍萜	17388-39-5	2	5711.76	73828.6	91704.4	117636	C09800	-
Lmln001856	479.086	316.023	480.09	C21H20O13	[M-H]-	5,7-Dihydroxy-4-oxo-2-(3,4,5-trihydroxyphenyl)-4H-chromen-3-yl-alloside	5,7-二羟基-4-氧代-2-(3,4,5-三羟基苯基)-4H-色烯-3-基-阿洛糖苷	Others	其它类	Others	其它	-	1	5711.04	5.64122e+06	5.22878e+06	6.01881e+06	-	-
Wafn001957	371.061	209.031	372.069	C15H16O11	[M-H]-	2-O-Caffeoylglucaric Acid	2-O-咖啡酰葡萄糖二酸	Phenolic acids	酚酸类	Phenolic acids	酚酸类	-	2	5601.74	7.9153e+06	1.1327e+07	1.10424e+07	C03062	-
mws0058	299.056	284.033	300.063	C16H12O6	[M-H]-	Diosmetin (5,7,3'-Trihydroxy-4'-methoxyflavone)	香叶木素	Flavonoids	黄酮	Flavones	黄酮	520-34-3	3	5574.15	1.52852e+06	1.32056e+06	1.32909e+06	C10038	-
mws0629	281.113	166.086	280.106	C13H16N2O5	[M+H]+	L-Aspartyl-L-Phenylalanine	L-天冬氨酰-L-苯丙氨酸	Amino acids and derivatives	氨基酸及其衍生物	Amino acids and derivatives	氨基酸及其衍生物	13433-09-5	3	5542.77	69142.6	59707.4	60929.2	-	-
Hajp006320	287.055	153.018	286.048	C15H10O6	[M+H]+	Luteolin (5,7,3',4'-Tetrahydroxyflavone)	木犀草素	Flavonoids	黄酮	Flavones	黄酮	491-70-3	2	5523.53	672885	675104	675576	C01514	ko00941,ko00944,ko01100,ko01110
pmb3068	337.093	163.04	338.1	C16H18O8	[M-H]-	1-O-p-Coumaroylquinic acid	1-O-对香豆酰奎宁酸	Phenolic acids	酚酸类	Phenolic acids	酚酸类	-	2	5500.89	610330	450941	465903	-	-
HJN055	435.13	273.077	436.137	C21H24O10	[M-H]-	Dihydrocharcone-4'-O-glucoside	二氢查耳酮-4'-O-葡萄糖苷	Flavonoids	黄酮	Chalcones	查耳酮	-	3	5472.73	45665.9	48382.8	47760.3	-	-
Lmjp004941	301.071	286.047	300.063	C16H12O6	[M+H]+	3,5,4'-Trihydroxy-7-methoxyflavone (Rhamnocitrin)	鼠李柠檬素	Flavonoids	黄酮	Flavonols	黄酮醇	569-92-6	1	5461.51	815325	831892	811614	C17059	-
Lmbn001288	131.035	87.0443	132.042	C5H8O4	[M-H]-	2-Hydroxy-2-methyl-3-oxobutanoic acid	2-羟基-2-甲基-3-氧代丁酸	Organic acids	有机酸	Organic acids	有机酸	71698-08-3	3	5432.45	60817	63821.3	69558.7	C06010	ko00290,ko00650,ko00660,ko00770,ko01100,ko01110,ko01210,ko01230
mws4176	237.123	120.088	236.116	C12H16N2O3	[M+H]+	L-Alanyl-L-Phenylalanine	L-丙氨酰-L-苯丙氨酸	Amino acids and derivatives	氨基酸及其衍生物	Amino acids and derivatives	氨基酸及其衍生物	3061-90-3	2	5402.4	34682.7	42446.2	31686.7	-	-
pmp000548	301.071	286.047	300.063	C16H12O6	[M+H]+	Pratensein	红车轴草素	Flavonoids	黄酮	Isoflavones	异黄酮	2284-31-3	3	5386.83	1.01408e+06	908972	891453	C10520	ko00943
Hajp007218	301.071	286.049	300.063	C16H12O6	[M+H]+	5,7,3',5'-tetrahydroxy-6-methylfavanone	5,7,3',5'-四羟基-6-甲基黄酮	Flavonoids	黄酮	Flavones	黄酮	-	1	5380.08	897420	893633	783128	-	-
mws0147	117.056	59.0139	118.063	C5H10O3	[M-H]-	β-Hydroxyisovaleric acid	β-羟基异戊酸	Organic acids	有机酸	Organic acids	有机酸	625-08-1	3	5330.74	32188.7	37543.9	35572.8	C20827	ko00280,ko01100
Zmdn001564	293.115	164.072	294.122	C14H18N2O5	[M-H]-	γ-Glutamylphenylalanine	γ-谷氨酰胺苯丙氨酸	Amino acids and derivatives	氨基酸及其衍生物	Amino acids and derivatives	氨基酸及其衍生物	7432-24-8	3	5326.09	50940.4	65681.5	56121.4	-	-
pmn001421	337.093	191.056	338.1	C16H18O8	[M-H]-	3-O-p-Coumaroylquinic acid*	3-O-对香豆酰奎宁酸*	Phenolic acids	酚酸类	Phenolic acids	酚酸类	87099-71-6	2	5266.63	8.58922e+06	8.68426e+06	8.09206e+06	-	-
pmb2653	649.22	145.051	650.227	C24H42O20	[M-H]-	DMelezitose O-rhamnoside	松三糖 O-鼠李糖苷	Others	其它类	Saccharides	糖类	-	3	5223.91	23493.9	38501.4	45678.9	-	-
pme2244	190.086	118.065	189.079	C11H11NO2	[M+H]+	3-Indolepropionic acid	3-吲哚丙酸	Alkaloids	生物碱	Plumerane	吲哚类生物碱	830-96-6	2	5089.81	105156	103233	115645	-	-
pmp000001	301.071	286.047	300.063	C16H12O6	[M+H]+	Hispidulin (5,7,4'-Trihydroxy-6-methoxyflavone)	高车前素	Flavonoids	黄酮	Flavones	黄酮	1447-88-7	3	5016.71	913539	819459	801721	C10058	-
pmn001523	473.036	169.013	474.043	C21H14O13	[M-H]-	Trigallic acid	三没食子酸	Phenolic acids	酚酸类	Phenolic acids	酚酸类	2131-66-0	2	4972.84	88422.3	89141.1	90939.2	-	-
Lmsn002288	503.141	341.088	504.148	C21H28O14	[M-H]-	1-O-Caffeoyl-(6-O-glucosyl)-β-D-glucose	1-O-咖啡酰-6-O-葡萄糖基-β-D-葡萄糖	Phenolic acids	酚酸类	Phenolic acids	酚酸类	-	2	4971.85	121539	110414	96283.2	-	-
pme2074	322.202	130.05	323.21	C18H29NO4	[M-H]-	Jasmonoyl-L-Isoleucine	茉莉酰-L-异亮氨酸	Amino acids and derivatives	氨基酸及其衍生物	Amino acids and derivatives	氨基酸及其衍生物	120330-93-0	3	4951.62	1.45597e+06	1.44871e+06	1.44141e+06	C18699	ko04075
Lmmp003042	169.049	123.044	168.042	C8H8O4	[M+H]+	Protocatechuic Acid Methyl Ester	原儿茶酸甲酯	Phenolic acids	酚酸类	Phenolic acids	酚酸类	2150-43-8	1	4946.59	162455	151037	156769	-	-
Zmpn003368	293.214	195.139	294.219	C18H30O3	[M-H]-	13S-Hydroxy-9Z,11E,15Z-octadecatrienoic acid	13S-羟基-9Z,11E,15Z-十八碳三烯酸	Lipids	脂质	Free fatty acids	游离脂肪酸	87984-82-5	2	4795.35	353931	360099	329115	C16316	ko00592
mws1589	503.162	179.055	504.169	C18H32O16	[M-H]-	D-Panose	D-潘糖	Others	其它类	Saccharides	糖类	33401-87-5	2	4694.02	51866.2	48221.8	46886.5	C00713	-
Lmbn005487	313.238	251.24	314.246	C18H34O4	[M-H]-	12,13-DHOME; (9Z)-12,13-Dihydroxyoctadec-9-enoic acid	12,13-二羟基十八烷基-9-烯酸	Lipids	脂质	Free fatty acids	游离脂肪酸	263399-35-5	3	4685.98	71253.9	70116.3	70273.1	C14829	ko00591
mws0097	357.134	151.038	358.142	C20H22O6	[M-H]-	Pinoresinol*	松脂醇*	Lignans and Coumarins	木脂素和香豆素	Lignans	木脂素	487-36-5	1	4488.8	215520	238549	238216	C05366	ko00999,ko01100,ko01110
mws0014	193.051	134.037	194.058	C10H10O4	[M-H]-	Ferulic acid	阿魏酸	Phenolic acids	酚酸类	Phenolic acids	酚酸类	537-98-4	1	4372.37	123696	130941	103085	C01494	ko00940,ko01100,ko01110
Lmhp112042	355.284	263.237	354.277	C21H38O4	[M+H]+	1-Linoleoylglycerol*	1-亚油酰甘油酯*	Lipids	脂质	Glycerol ester	甘油酯	2277-28-3	3	4355.67	191422	172730	156206	-	-
mws0064	287.056	135.045	288.063	C15H12O6	[M-H]-	Eriodictyol (5,7,3',4'-Tetrahydroxyflavanone)	圣草酚	Flavonoids	黄酮	Flavanones	二氢黄酮	552-58-9	3	4304.86	84743.7	89175.5	88648.4	C05631	ko00941,ko01100,ko01110
MWS4354	282.12	150.079	281.112	C11H15N5O4	[M+H]+	N6-methyladenosine	N6-甲基腺苷	Nucleotides and derivatives	核苷酸及其衍生物	Nucleotides and derivatives	核苷酸及其衍生物	1867-73-8	3	4304.08	72283.7	69246.8	86253.3	-	-
Lmbn005287	311.223	249.225	312.23	C18H32O4	[M-H]-	7S,8S-DiHODE; (9Z,12Z)-(7S,8S)-Dihydroxyoctadeca-9,12-dienoic acid	7,8-二羟基-9,12-十八碳二烯酸	Lipids	脂质	Free fatty acids	游离脂肪酸	143288-65-7	3	4215.89	16426.6	17052.9	14418.9	C07354	ko00591
Zmhn001793	341.089	179.034	342.095	C15H18O9	[M-H]-	6-O-Caffeoyl-D-glucose	6-O-咖啡酰-D-葡萄糖	Phenolic acids	酚酸类	Phenolic acids	酚酸类	-	2	4111.35	883862	1.1763e+06	892028	-	-
pma3724	369.118	177.055	368.111	C17H20O9	[M+H]+	1-O-Feruloylquinic acid	1-O-阿魏酰奎宁酸	Phenolic acids	酚酸类	Phenolic acids	酚酸类	-	3	4038.03	161341	159325	125062	-	-
Lmhp009190	679.39	263.237	678.383	C33H58O14	[M+H]+	2-Linoleoylglycerol-1,3-di-O-glucoside	2-亚油酰甘油酯-1,3-二-O-葡萄糖苷	Lipids	脂质	Glycerol ester	甘油酯	-	1	3916.63	14014.2	11295.5	7440.54	-	-
Hmbp002730	287.055	153.01	286.048	C15H10O6	[M+H]+	Isoscutellarein	异野黄芩素	Flavonoids	黄酮	Flavones	黄酮	41440-05-5	1	3865.83	752912	727435	675793	C10097	-
Lmxn015337	269.249	251.238	270.256	C17H34O2	[M-H]-	Methyl palmitate	棕榈酸甲酯	Lipids	脂质	Free fatty acids	游离脂肪酸	112-39-0	3	3767.19	30539.6	29044.6	25570	C16995	-
zjbp110819	311.128	251.106	310.12	C19H18O4	[M+H]+	6,7-dimethoxy-2-[2-phenylethyl]chromone	6,7-二甲氧基-2-[2-苯乙基]色酮	Others	其它类	Others	其它	-	2	3735.32	17172.6	23454.6	22652.2	-	-
mws0232	377.146	243.088	376.138	C17H20N4O6	[M+H]+	Riboflavin (Vitamin B2)	核黄素 (维生素 B2)	Others	其它类	Vitamin	维生素	83-88-5	2	3712.76	433140	333220	545109	C00255	ko00740,ko01100,ko01110,ko01240,ko02010
Lmhp011562	353.269	261.221	352.261	C21H36O4	[M+H]+	1-α-Linolenoyl-glycerol*	1-α-亚麻酸甘油酯*	Lipids	脂质	Glycerol ester	甘油酯	-	2	3656.45	621249	579938	580451	-	-
Zmjn001813	159.066	97.0649	160.074	C7H12O4	[M-H]-	Pimelic acid	庚二酸	Organic acids	有机酸	Organic acids	有机酸	111-16-0	3	3416.29	76416.1	83912	74446.6	C02656	ko00780,ko01100,ko01240
mws2368	137.061	119.05	138.068	C8H10O2	[M-H]-	Tyrosol; 4-Hydroxyphenylethanol	酪醇; 对羟基苯乙醇	Phenolic acids	酚酸类	Phenolic acids	酚酸类	501-94-0	3	3289.38	28987.4	31691.2	24263.4	C06044	ko00350,ko01100
Xmyp004678	727.208	287.054	726.201	C32H38O19	[M+H]+	Kaempferol-3-O-(2-O-Xylosyl-6-O-Rhamnosyl)Glucoside	山柰酚-3-O-(2''-O-木糖基-6''-O-鼠李糖基)葡萄糖苷	Flavonoids	黄酮	Flavonols	黄酮醇	-	1	3125.66	3.99606e+06	3.2855e+06	3.61634e+06	-	-
Lmbn005172	165.056	119.05	166.063	C9H10O3	[M-H]-	2,6-Dimethoxybenzaldehyde	2,6-二甲氧基苯甲醛	Phenolic acids	酚酸类	Phenolic acids	酚酸类	3392-97-0	1	3086.03	24418.8	27209.3	32347.7	-	-
mws0467	165.056	119.05	166.063	C9H10O3	[M-H]-	3-(4-Hydroxyphenyl)-propionic acid	3-(4-羟基苯基)丙酸	Phenolic acids	酚酸类	Phenolic acids	酚酸类	501-97-3	3	3086.03	24418.8	27209.3	32347.7	C01744	-
MWS0274	165.056	119.05	166.063	C9H10O3	[M-H]-	DL-3-Phenyllactic acid	DL-3-苯基乳酸	Organic acids	有机酸	Organic acids	有机酸	828-01-3	3	3086.03	24418.8	27209.3	32347.7	-	-
pmb2999	461.109	299.1	462.116	C22H22O11	[M-H]-	Chrysoeriol-5-O-glucoside	金圣草黄素-5-O-葡萄糖苷	Flavonoids	黄酮	Flavones	黄酮	-	3	3042.56	36472.6	21577.1	18238.6	-	-
Zmdp003457	627.156	319.046	626.148	C27H30O17	[M+H]+	Myricetin-3-O-galactoside-3'-O-rhamnoside*	杨梅素-3-O-半乳糖苷-3'-O-鼠李糖苷*	Flavonoids	黄酮	Flavonols	黄酮醇	-	1	3037.04	1.56858e+06	2.4637e+06	1.74113e+06	-	-
Lmsp003729	627.156	319.046	626.148	C27H30O17	[M+H]+	Myricetin-3-O-rutinoside*	杨梅素-3-O-芸香糖苷*	Flavonoids	黄酮	Flavonols	黄酮醇	-	1	3037.04	1.56858e+06	2.4637e+06	1.74113e+06	-	-
HJAP061	743.205	303.053	742.196	C32H38O20	[M+H]+	Quercetin-3-O-(2''-O-arabinosyl)rutinoside	槲皮素-3-O-(2''-O-阿拉伯糖基)芸香糖苷	Flavonoids	黄酮	Flavonols	黄酮醇	-	1	2937.61	584181	468366	502876	-	-
mws1292	565.155	409.092	564.148	C26H28O14	[M+H]+	Isoschaftoside	异夏佛塔苷	Flavonoids	黄酮	Flavones	黄酮	52012-29-0	2	2912.3	576412	684528	649056	-	-
pmb2799	295.228	195.138	296.235	C18H32O3	[M-H]-	12,13-Epoxy-9-Octadecenoic Acid	12,13-环氧-9-十八碳烯酸	Lipids	脂质	Free fatty acids	游离脂肪酸	6799-85-5	3	2881.2	37777.9	36870	33697.3	C14826	ko00591,ko01100
Lmhp009526	515.322	261.221	514.314	C27H46O9	[M+H]+	2-α-Linolenoyl-glycerol-1-O-glucoside*	2-α-亚麻酸甘油酯-1-O-葡萄糖苷*	Lipids	脂质	Glycerol ester	甘油酯	-	2	2872.19	84211.3	78899.5	78834.3	-	-
pmp000593	595.166	287.055	594.159	C27H30O15	[M+H]+	Luteolin-7-O-rutinoside*	木犀草素-7-O-芸香糖苷*	Flavonoids	黄酮	Flavones	黄酮	3563-98-2	1	2865.47	5.96176e+06	5.42198e+06	5.79283e+06	-	-
MWSHY0064	625.174	317.065	624.169	C28H32O16	[M+H]+	Isorhamnetin-3-O-neohesperidoside	异鼠李素-3-O-新橙皮糖苷	Flavonoids	黄酮	Flavonols	黄酮醇	55033-90-4	2	2828.65	298575	260524	330436	-	-
Lmgp003989	499.126	163.04	498.116	C25H22O11	[M+H]+	Dicaffeoylshikimic acid	二咖啡酰基莽草酸	Phenolic acids	酚酸类	Phenolic acids	酚酸类	-	1	2758.76	5.27474e+06	3.44881e+06	4.46313e+06	-	-
Wafn002827	357.119	195.067	358.126	C16H22O9	[M-H]-	Dihydroferulic acid glucoside	二氢阿魏酸 葡萄糖苷	Phenolic acids	酚酸类	Phenolic acids	酚酸类	-	1	2508.51	164262	180742	197126	-	-
Lmgn000160	131.046	70.0297	132.054	C4H8N2O3	[M-H]-	3-Ureidopropionic Acid	3-脲基丙酸	Organic acids	有机酸	Organic acids	有机酸	462-88-4	1	2484.33	86602	137725	81018.7	C02642	ko00240,ko00410,ko00770,ko01100
Lmyn006227	269.046	151.005	270.053	C15H10O5	[M-H]-	Galangin (3,5,7-Trihydroxyflavone)	高良姜素	Flavonoids	黄酮	Flavones	黄酮	548-83-4	3	2470.21	480008	444153	459347	C10044	ko00941
MWS5209	235.164	118.087	117.079	C5H11NO2	[2M+H]+	N-Methyl-α-aminoisobutyric acid	N-甲基-α-氨基异丁酸	Amino acids and derivatives	氨基酸及其衍生物	Amino acids and derivatives	氨基酸及其衍生物	2566-34-9	3	2132.01	25526.8	17005.3	29965.7	-	-
pma0170	498.26	177.055	497.253	C27H35N3O6	[M+H]+	N',N''-Diferuloylspermidine	N',N''-二阿魏酰亚精胺	Alkaloids	生物碱	Phenolamine	酚胺	-	3	2084.74	14124.7	23379.8	26435.1	-	-
Lmhp008742	542.324	184.073	541.317	C28H48NO7P	[M+H]+	LysoPC 20:5	溶血磷脂酰胆碱 20:5	Lipids	脂质	LPC	溶血磷脂酰胆碱	162440-04-2	2	2075.97	75207.6	75862.1	69022.8	-	-
Lmcn009122	253.217	235.209	254.225	C16H30O2	[M-H]-	(7Z)-Hexadecenoic acid	(7Z)-十六碳烯酸	Lipids	脂质	Free fatty acids	游离脂肪酸	2416-19-5	1	2070.35	85903.5	77346.9	79388.5	-	-
Zaln004082	335.076	179.034	336.085	C16H16O8	[M-H]-	3-O-caffeoylshikimic acid*	3-O-咖啡酰莽草酸*	Phenolic acids	酚酸类	Phenolic acids	酚酸类	-	1	1993.73	351526	344177	327502	-	-
pmp000086	269.102	177.055	268.095	C13H16O6	[M+H]+	1-Feruloyl-sn-glycerol*	1-阿魏酰-sn-甘油*	Phenolic acids	酚酸类	Phenolic acids	酚酸类	-	3	1960.36	45384.3	39591.3	21241.3	-	-
Zmcp102703	521.2	131.048	520.194	C26H32O11	[M+H]+	saikolignanoside D	柴胡木脂素苷D	Lignans and Coumarins	木脂素和香豆素	Lignans	木脂素	-	2	1816.93	241828	171147	177071	-	-
Cmsp003083	521.201	131.049	520.194	C26H32O11	[M+H]+	Dehydrodiconiferyl alcohol-4-O-glucoside	脱氢二十二烷醇-4-O-葡萄糖苷	Lignans and Coumarins	木脂素和香豆素	Lignans	木脂素	107870-88-2	1	1733.69	201525	152622	145565	-	-
Zmyn004449	309.208	171.103	310.214	C18H30O4	[M-H]-	9-Hydroxy-12-oxo-10(E),15(Z)-octadecadienoic acid	9-羟基-12-氧代-10(E),15(Z)-十八碳二烯酸	Lipids	脂质	Free fatty acids	游离脂肪酸	-	2	1641.93	10874	10936.3	11687.3	C21923	ko00592,ko01110
pmb0628	613.176	451.1	612.169	C27H32O16	[M+H]+	Eriodictyol-8-C-glucoside-4'-O-glucoside	圣草酚-8-C-葡萄糖苷-4'-O-葡萄糖苷	Flavonoids	黄酮	Flavanones	二氢黄酮	-	3	1634.26	25646	23982.5	22246.2	-	-
pmp000587	535.108	287.05	534.101	C24H22O14	[M+H]+	Luteolin-7-O-(6''-malonyl)glucoside	木犀草素-7-O-(6''-丙二酰)葡萄糖苷	Flavonoids	黄酮	Flavones	黄酮	-	2	1553.65	883474	906764	1.08242e+06	C10103	-
Lmhp009773	515.322	261.221	514.314	C27H46O9	[M+H]+	1-α-Linolenoyl-glycerol-3-O-glucoside*	1-α-亚麻酸甘油酯-3-O-葡萄糖苷*	Lipids	脂质	Glycerol ester	甘油酯	-	2	1545.86	36069.9	33266.7	31546.7	-	-
Lmrn002746	131.071	85.0654	132.079	C6H12O3	[M-H]-	2-Hydroxy-4-methylpentanoic acid	2-羟基-4-甲基戊酸	Organic acids	有机酸	Organic acids	有机酸	498-36-2	3	1484.94	44118.3	40813.1	51756	-	-
Lmbp002309	371.102	209.048	370.126	C17H22O9	[M+H]+	Sinapaldehyde-4-O-Glucoside	芥子醛-4-O-葡萄糖苷	Phenolic acids	酚酸类	Phenolic acids	酚酸类	154461-65-1	3	1478.95	260753	273517	309577	-	-
Hmqp006023	326.274	309.27	324.266	C20H36O3	[M+H]+	Ethyl 9-Hydroxy-10,12-octadecadienoic acid	9-羟基-10,12-十八碳二烯酸乙酯	Lipids	脂质	Free fatty acids	游离脂肪酸	-	3	1443.38	15144	14598.3	14159.4	-	-
Hmyn007168	483.272	255.232	484.28	C22H45O9P	[M-H]-	LysoPG 16:0	溶血磷脂酰甘油 16:0	Lipids	脂质	Glycerol ester	甘油酯	-	2	1435.79	52655.9	37169.9	39219.7	-	-
Zmhn002334	355.104	193.049	356.111	C16H20O9	[M-H]-	6-O-Feruloyl-β-D-glucose	6-O-阿魏酰-D-葡萄糖	Phenolic acids	酚酸类	Phenolic acids	酚酸类	137887-25-3	1	1372.47	109775	127228	123079	-	-
Cmjn004337	401.144	269.104	402.153	C18H26O10	[M-H]-	Benzyl-(2''-O-xylosyl)glucoside	苄基-(2''-O-木糖基)葡萄糖苷	Phenolic acids	酚酸类	Phenolic acids	酚酸类	-	2	1365.08	114897	151868	120067	-	-
Lmhp008513	677.374	261.221	676.367	C33H56O14	[M+H]+	2-α-Linolenoyl-glycerol-1,3-di-O-glucoside	2-α-亚麻酸甘油酯-1,3-二-O-葡萄糖苷	Lipids	脂质	Glycerol ester	甘油酯	-	2	1164.67	42673.9	40475.9	30885.1	-	-
Zmxp003107	611.161	287.057	610.153	C27H30O16	[M+H]+	Luteolin-7,3'-di-O-glucoside	木犀草素-7,3'-O-二葡萄糖苷	Flavonoids	黄酮	Flavones	黄酮	52187-80-1	3	1053.53	1.06528e+06	749776	676983	-	-
Hmdp103165	741.224	287.06	740.216	C33H40O19	[M+H]+	Clitorin	蝶豆素	Flavonoids	黄酮	Flavones	黄酮	55804-74-5	2	1045.49	75304.6	95078.5	72738.3	-	-
pmp001110	535.145	517.134	534.137	C25H26O13	[M+H]+	Apigenin-6-C-xyloside-8-C-arabinoside	芹菜素-6-C-木糖苷-8-C-阿拉伯糖苷	Flavonoids	黄酮	Flavones	黄酮	-	3	1043.47	56143.1	30844.1	45678.2	-	-
Zahp003766	597.145	303.052	596.138	C26H28O16	[M+H]+	Quercetin 3-O-glucoside 7-O-xyloside	槲皮素-3-O-葡萄糖-7-O-木糖苷	Flavonoids	黄酮	Flavonols	黄酮醇	-	1	1027.88	1.51107e+06	1.46378e+06	1.55392e+06	-	-
pmb0709	713.156	465.2	712.149	C30H32O20	[M+H]+	Quercetin-7-O-(6''-malonyl)glucosyl-5-O-glucoside	槲皮素-7-O-(6''-丙二酰)葡萄糖苷-5-O-葡萄糖苷	Flavonoids	黄酮	Flavonols	黄酮醇	-	1	1027.88	124332	147964	133579	-	-
Lmtp002474	565.155	427.101	564.148	C26H28O14	[M+H]+	Apigenin-6-C-(2''-glucosyl)arabinoside	芹菜素-6-C-(2''-葡萄糖基)阿拉伯糖苷	Flavonoids	黄酮	Flavones	黄酮	-	2	978.335	987785	938183	1.027e+06	-	-
Wagp001908	427.207	177.055	426.2	C20H30N2O8	[M+H]+	N-Feruloylputrescine N-glucoside	N-阿魏酰腐胺 N-葡萄糖苷	Alkaloids	生物碱	Phenolamine	酚胺	-	2	954.53	105883	98072.5	95149.6	-	-
Hmcp001598	611.16	317.06	610.153	C27H30O16	[M+H]+	Isorhamnetin-3-O-(2''-O-xylosyl)glucoside	异鼠李素-3-O-(2''-O-木糖基)葡萄糖苷	Flavonoids	黄酮	Flavonols	黄酮醇	-	3	932.059	154794	113186	130653	-	-
Ymjm000140	369.115	177.053	368.111	C17H20O9	[M+H]+	3-O-Caffeoylquinic acid methyl ester	3-O-咖啡酰奎尼酸甲酯	Phenolic acids	酚酸类	Phenolic acids	酚酸类	123483-19-2	2	816.117	310471	329294	298090	-	-
mws0884	328.045	134.047	329.053	C10H12N5O6P	[M-H]-	Cyclic 3',5'-Adenylic acid	环-3',5'-腺嘌呤核苷酸	Nucleotides and derivatives	核苷酸及其衍生物	Nucleotides and derivatives	核苷酸及其衍生物	60-92-4	1	791.372	14862.1	15984.6	16747.9	C00575	ko00230,ko01100
mws0056	463.088	316.025	464.096	C21H20O12	[M-H]-	Myricetin-3-O-rhamnoside (Myricitrin)	杨梅素-3-O-鼠李糖苷 (杨梅苷)	Flavonoids	黄酮	Flavonols	黄酮醇	17912-87-7	1	756.764	1.18791e+06	747129	987799	C10108	-
pmb2979	549.125	387.1	550.132	C25H26O14	[M-H]-	Hesperetin-7-O-(6''-malonyl)glucoside	橙皮素-7-O-(6''-丙二酰)葡萄糖苷	Flavonoids	黄酮	Flavanones	二氢黄酮	-	3	737.901	48902.2	38057.6	46722.7	-	-
mws1361	449.109	303.08	450.116	C21H22O11	[M-H]-	Taxifolin-3-O-rhamnoside (Astilbin)	花旗松素-3-O-鼠李糖苷(落新妇苷)	Flavonoids	黄酮	Flavanonols	二氢黄酮醇	29838-67-3	3	707.721	905415	892717	767137	C17449	-
Zaln004057	335.076	179.034	336.085	C16H16O8	[M-H]-	4-caffeoylshikimic acid*	4-咖啡酰莽草酸*	Phenolic acids	酚酸类	Phenolic acids	酚酸类	-	1	667.23	301135	326168	316918	-	-
mws0028	167.035	108.022	168.042	C8H8O4	[M-H]-	Vanillic acid	香草酸	Phenolic acids	酚酸类	Phenolic acids	酚酸类	121-34-6	1	658.427	45154.2	60203.9	56932.2	C06672	-
Lssp210311	455.351	207.173	454.345	C30H46O3	[M+H]+	3-Hydroxylup-12(13),20(29)-diene-28-oic acid	3-羟基羽扇豆烷-12(13),20(29)-二烯-28-油酸	Terpenoids	萜类	Triterpene	三萜	-	2	646.469	14885.4	12707	14025.2	-	-
