# Supplementary material for: Evaluation of the mechanism of the efficacy of Persicaria runcinata var. sinensis (Hemsl.) Bo Li on arthritis: an integrated widely targeted metabolomics and network pharmacology study
Source: Research Square preprint supplement (doi:10.21203/rs.3.rs-6208115/v1), 2025-03-26
Supplement: Supplementary file 2 [file 646edd06ebd256dfcf79ea6f.docx]

**Table S1 The *ITS2* nucleotide sequences of** *Persicaria runcinata var. Sinensis*

| 1 | CATCGAGTCTTTGA-CGCAAGTTGCGCCCGAAGCCTTCG | 39 |
| --- | --- | --- |
| 40 | GGCCAAGGGCACGTCTGCCTGGGCGTCACGCACCGCGTC | 79 |
| 89 | GCCCCCCTCCCCCATACAATGGGAGTGGTGGGGCGGATT | 119 |
| 120 | CTGGCCCCCCGTGCGCTGCCCGCTCGCGGTCGGCCTAAA | 159 |
| 160 | CATAGACCCCGTGGCCGCGAAATGCCGCGACGATTGGTG | 199 |
| 200 | GTTTCCTTGTGGCCTCGTGCCTCGAGCATCGCGTCGCGC | 239 |
| 240 | CTTTGGCGGCCCATGGTAGGTCAAAGGACCCTGAAGGAG | 279 |
| 280 | ACCCCCCCTCGGCGTCCATCAATGTGTGGG-ATGCCGAT | 319 |
| 320 | GGGATCCCCTAACCGTTGACCCCCCGGGACGGGGGGGAC | 359 |
| 360 | TCCCCTGTG | 369 |

**Table S2 Information table for some metabolites**

| **No.** | **Index** | **Formula** | **Compounds** | **Primary Substance Classification** | **Secondary Substance Classification** | **KEGG ID** | **CAS** | **Relative Content** |
| --- | --- | --- | --- | --- | --- | --- | --- | --- |
| 1 | mws0260 | C6H14N4O2 | L-Arginine | Amino acids and their derivatives | Amino acids and their derivatives | C00062 | 74-79-3 | 6.88E+07 |
| 2 | MWSHY0177 | C22H18O10 | Catechin gallate | Flavonoids | Flavanols | - | 130405-40-2 | 5.22E+07 |
| 3 | Hmln000659 | C13H16O10 | 3-O-Galloyl-D-glucose | Phenolic acids | Phenolic acids | - | - | 4.40E+07 |
| 4 | mws0024 | C7H6O5 | Gallic acid | Phenolic acids | Phenolic acids | C01424 | 149-91-7 | 3.84E+07 |
| 5 | pmn001516 | C14H14O9 | 5-Galloylshikimic acid | Phenolic acids | Phenolic acids | - | 95719-51-0 | 3.61E+07 |
| 6 | Wmmp000182 | C14H6O8 | ellagicacid | Phenolic acids | Phenolic acids | - | - | 2.95E+07 |
| 7 | mws0277 | C7H12O6 | Quinic Acid | Organic acids | Organic acids | C00296 | 77-95-2 | 2.91E+07 |
| 8 | mws2120 | C13H8O8 | Brevifolin carboxylic acid | Phenolic acids | Phenolic acids | - | 18490-95-4 | 2.54E+07 |
| 9 | Wmmn002441 | C10H16O3 | (E)-Linalool-1-oic acid | Lipids | Free fatty acids | - | - | 2.47E+07 |
| 10 | Lmyn002788 | C8H8O5 | Methyl gallate | Phenolic acids | Phenolic acids | - | 99-24-1 | 2.36E+07 |
| 11 | pme0040 | C5H5N5 | Adenine | Nucleotides and their derivatives | Nucleotides and their derivatives | C00147 | 73-24-5 | 1.60E+07 |
| 12 | HJN037 | C8H8O5 | 4-O-Methylgallic Acid | Phenolic acids | Phenolic acids | - | 4319-02-2 | 1.57E+07 |
| 13 | Lmxp000939 | C5H5N5 | Zarzissine | Alkaloids | Alkaloids | - | 160568-14-9 | 1.54E+07 |

TableA.1 (continued)

| **Number** | **Index** | **Formula** | **Compounds** | **Primary Substance Classification** | **Secondary Substance Classification** | | **KEGG ID** | **CAS** | **Relative Content** |
| --- | --- | --- | --- | --- | --- | --- | --- | --- | --- |
| 14 | Zayn006347 | C16H10O8 | 3,3'-O-Dimethylellagic Acid | Tannins | | Tannins | - | 2239-88-5 | 1.47E+07 |
| 15 | mws0281 | C6H8O7 | Citric Acid | Organic acids | | Organic acids | C00158 | 77-92-9 | 1.29E+07 |
| 16 | Lmyn001519 | C11H10O9 | L-Malic acid-2-O-gallate | Phenolic acids | | Phenolic acids | - | - | 1.25E+07 |
| 17 | MWS04412 | C8H18N2O2 | N(6),N(6)-Dimethyl-L-lysine | Amino acids and their derivatives | | Amino acids and their derivatives | - | 2259-86-1 | 1.21E+07 |
| 18 | pme0460 | C15H14O6 | Epicatechin* | Flavonoids | | Flavanols | C09727 | 490-46-0 | 1.18E+07 |
| 19 | mws0154 | C7H10O5 | Shikimic acid | Organic acids | | Organic acids | C00493 | 138-59-0 | 1.07E+07 |
| 20 | pmb1650 | C18H30O2 | Octadeca-11E,13E,15Z-trienoic acid | Lipids | | Free fatty acids | - | 25575-00-2 | 1.03E+07 |
