# Supplementary material for: Evaluation of the mechanism of the efficacy of Persicaria runcinata var. sinensis (Hemsl.) Bo Li on arthritis: an integrated widely targeted metabolomics and network pharmacology study
Source: Research Square preprint supplement (doi:10.21203/rs.3.rs-6208115/v1), 2025-03-26
Supplement: Supplementary file 3 [file c92e4d80e5317809f8c0ad4e.docx]

a
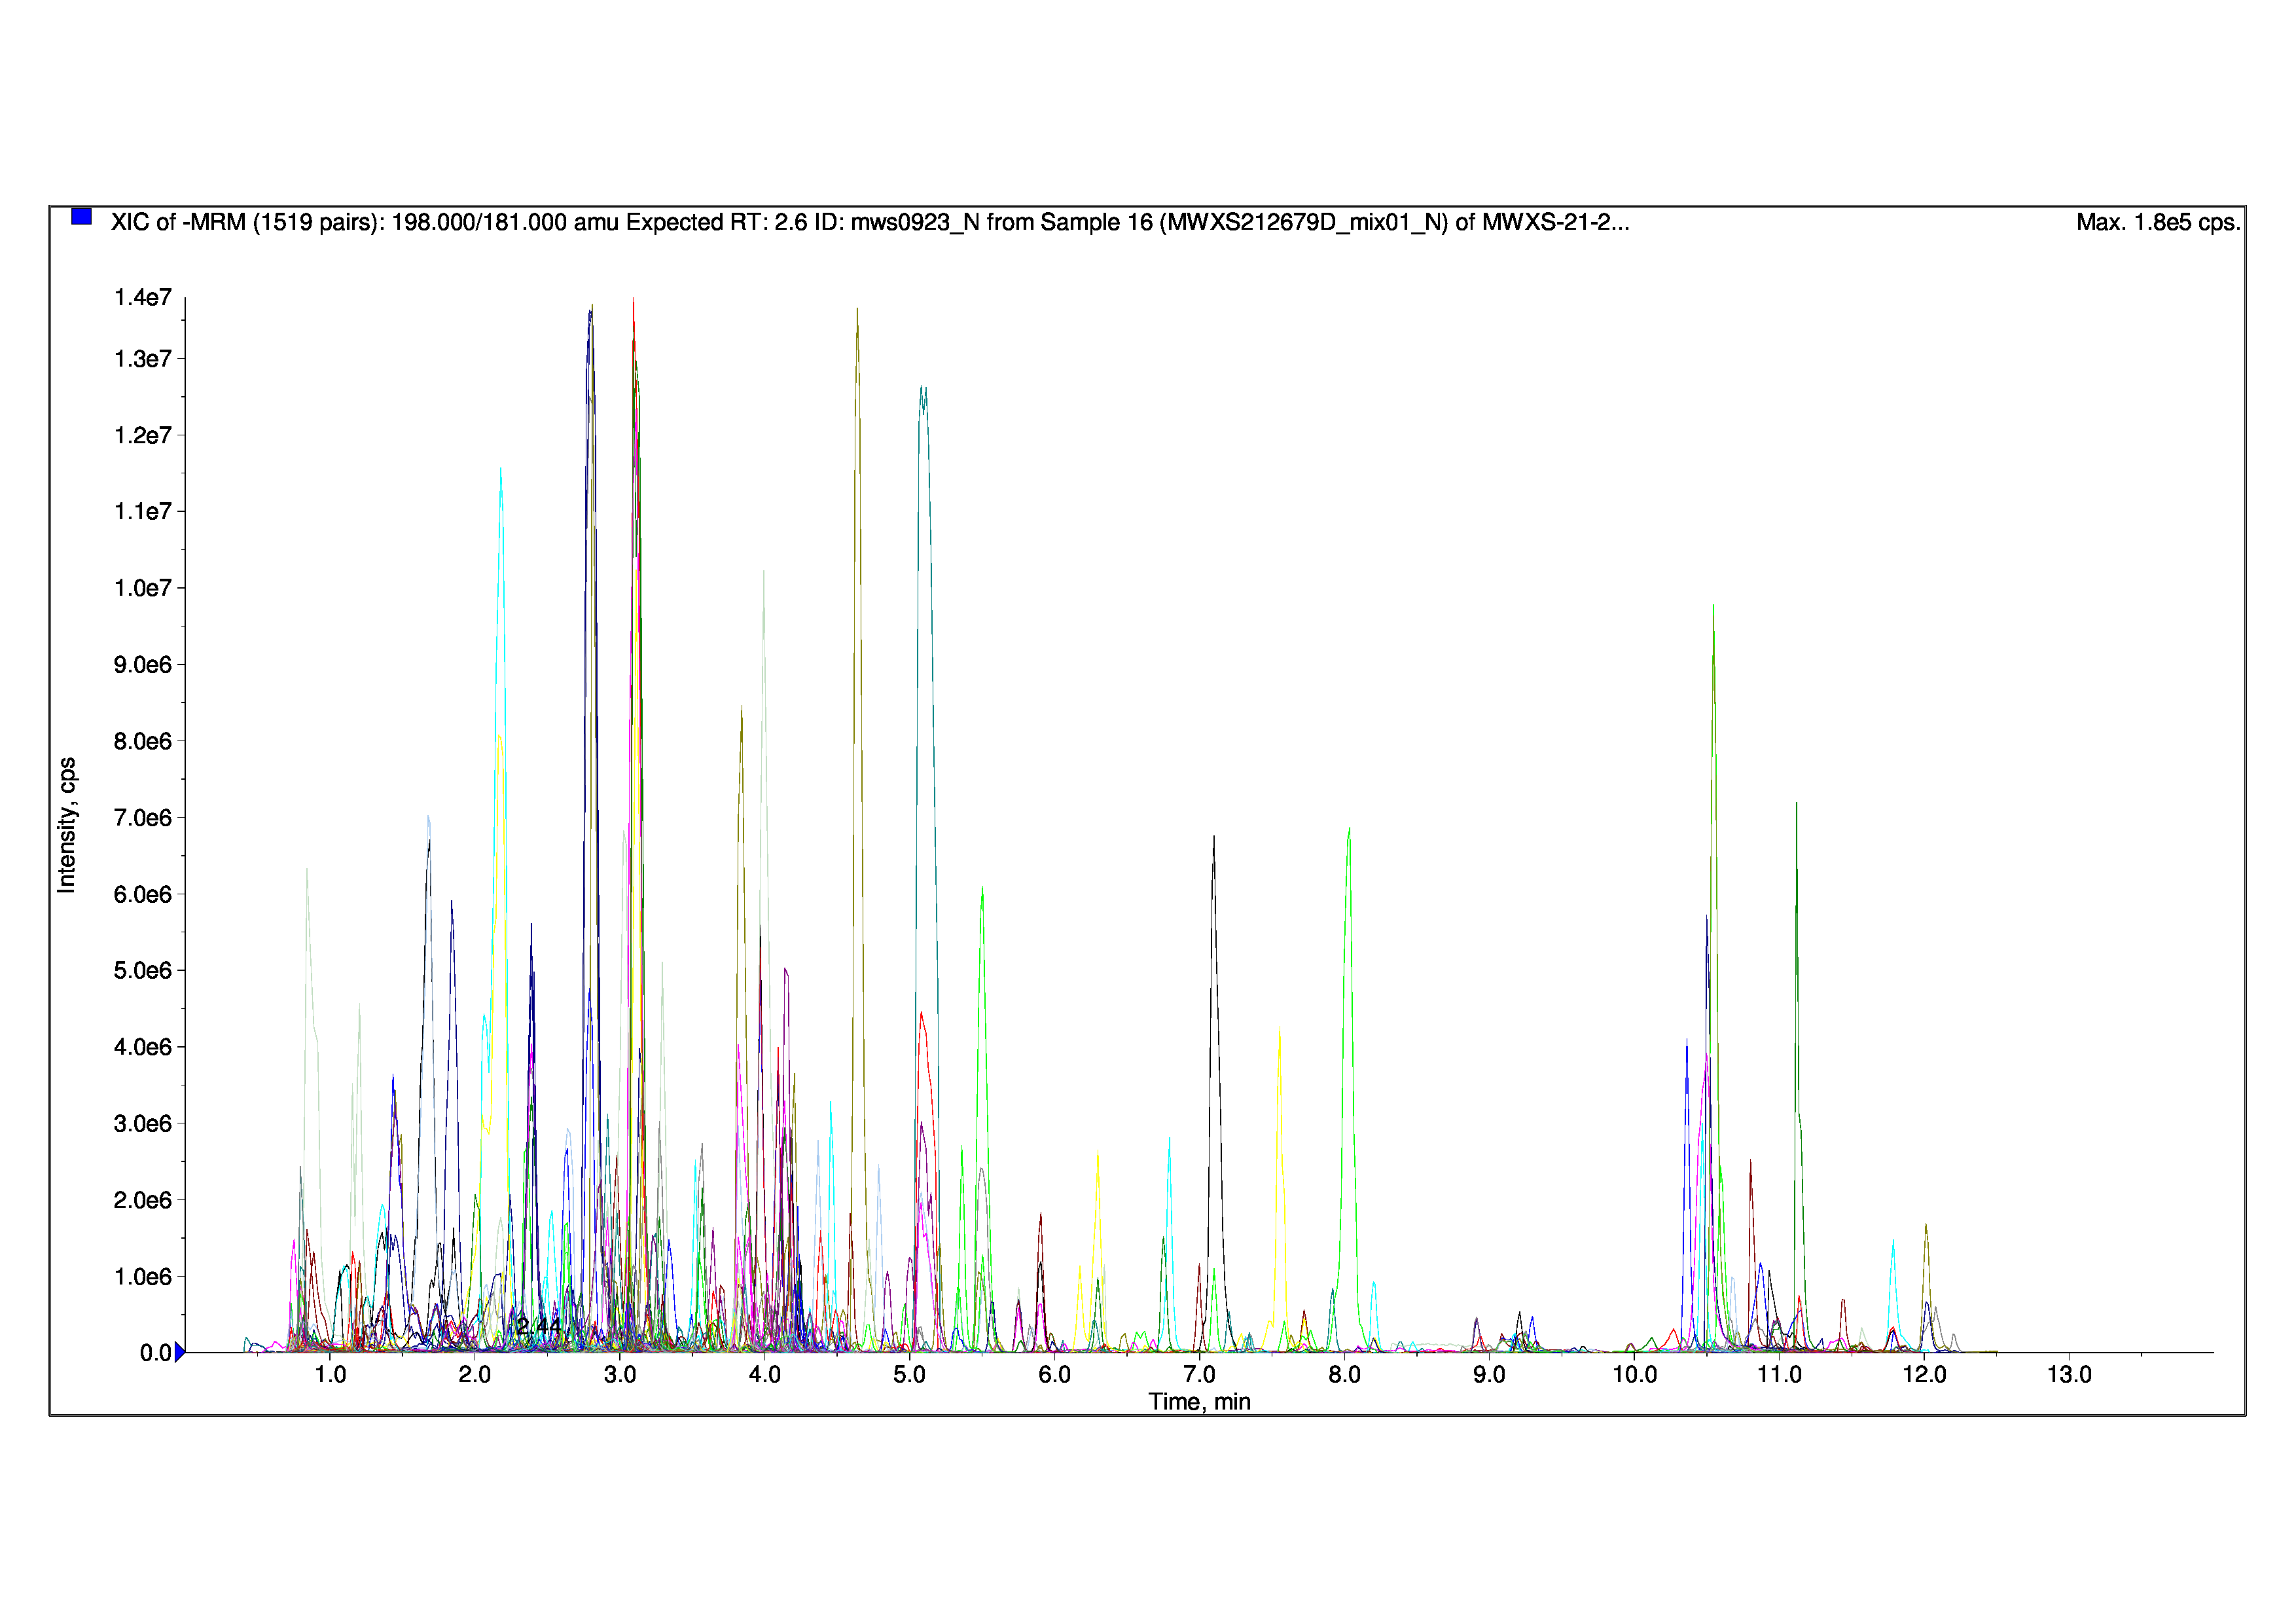
 b
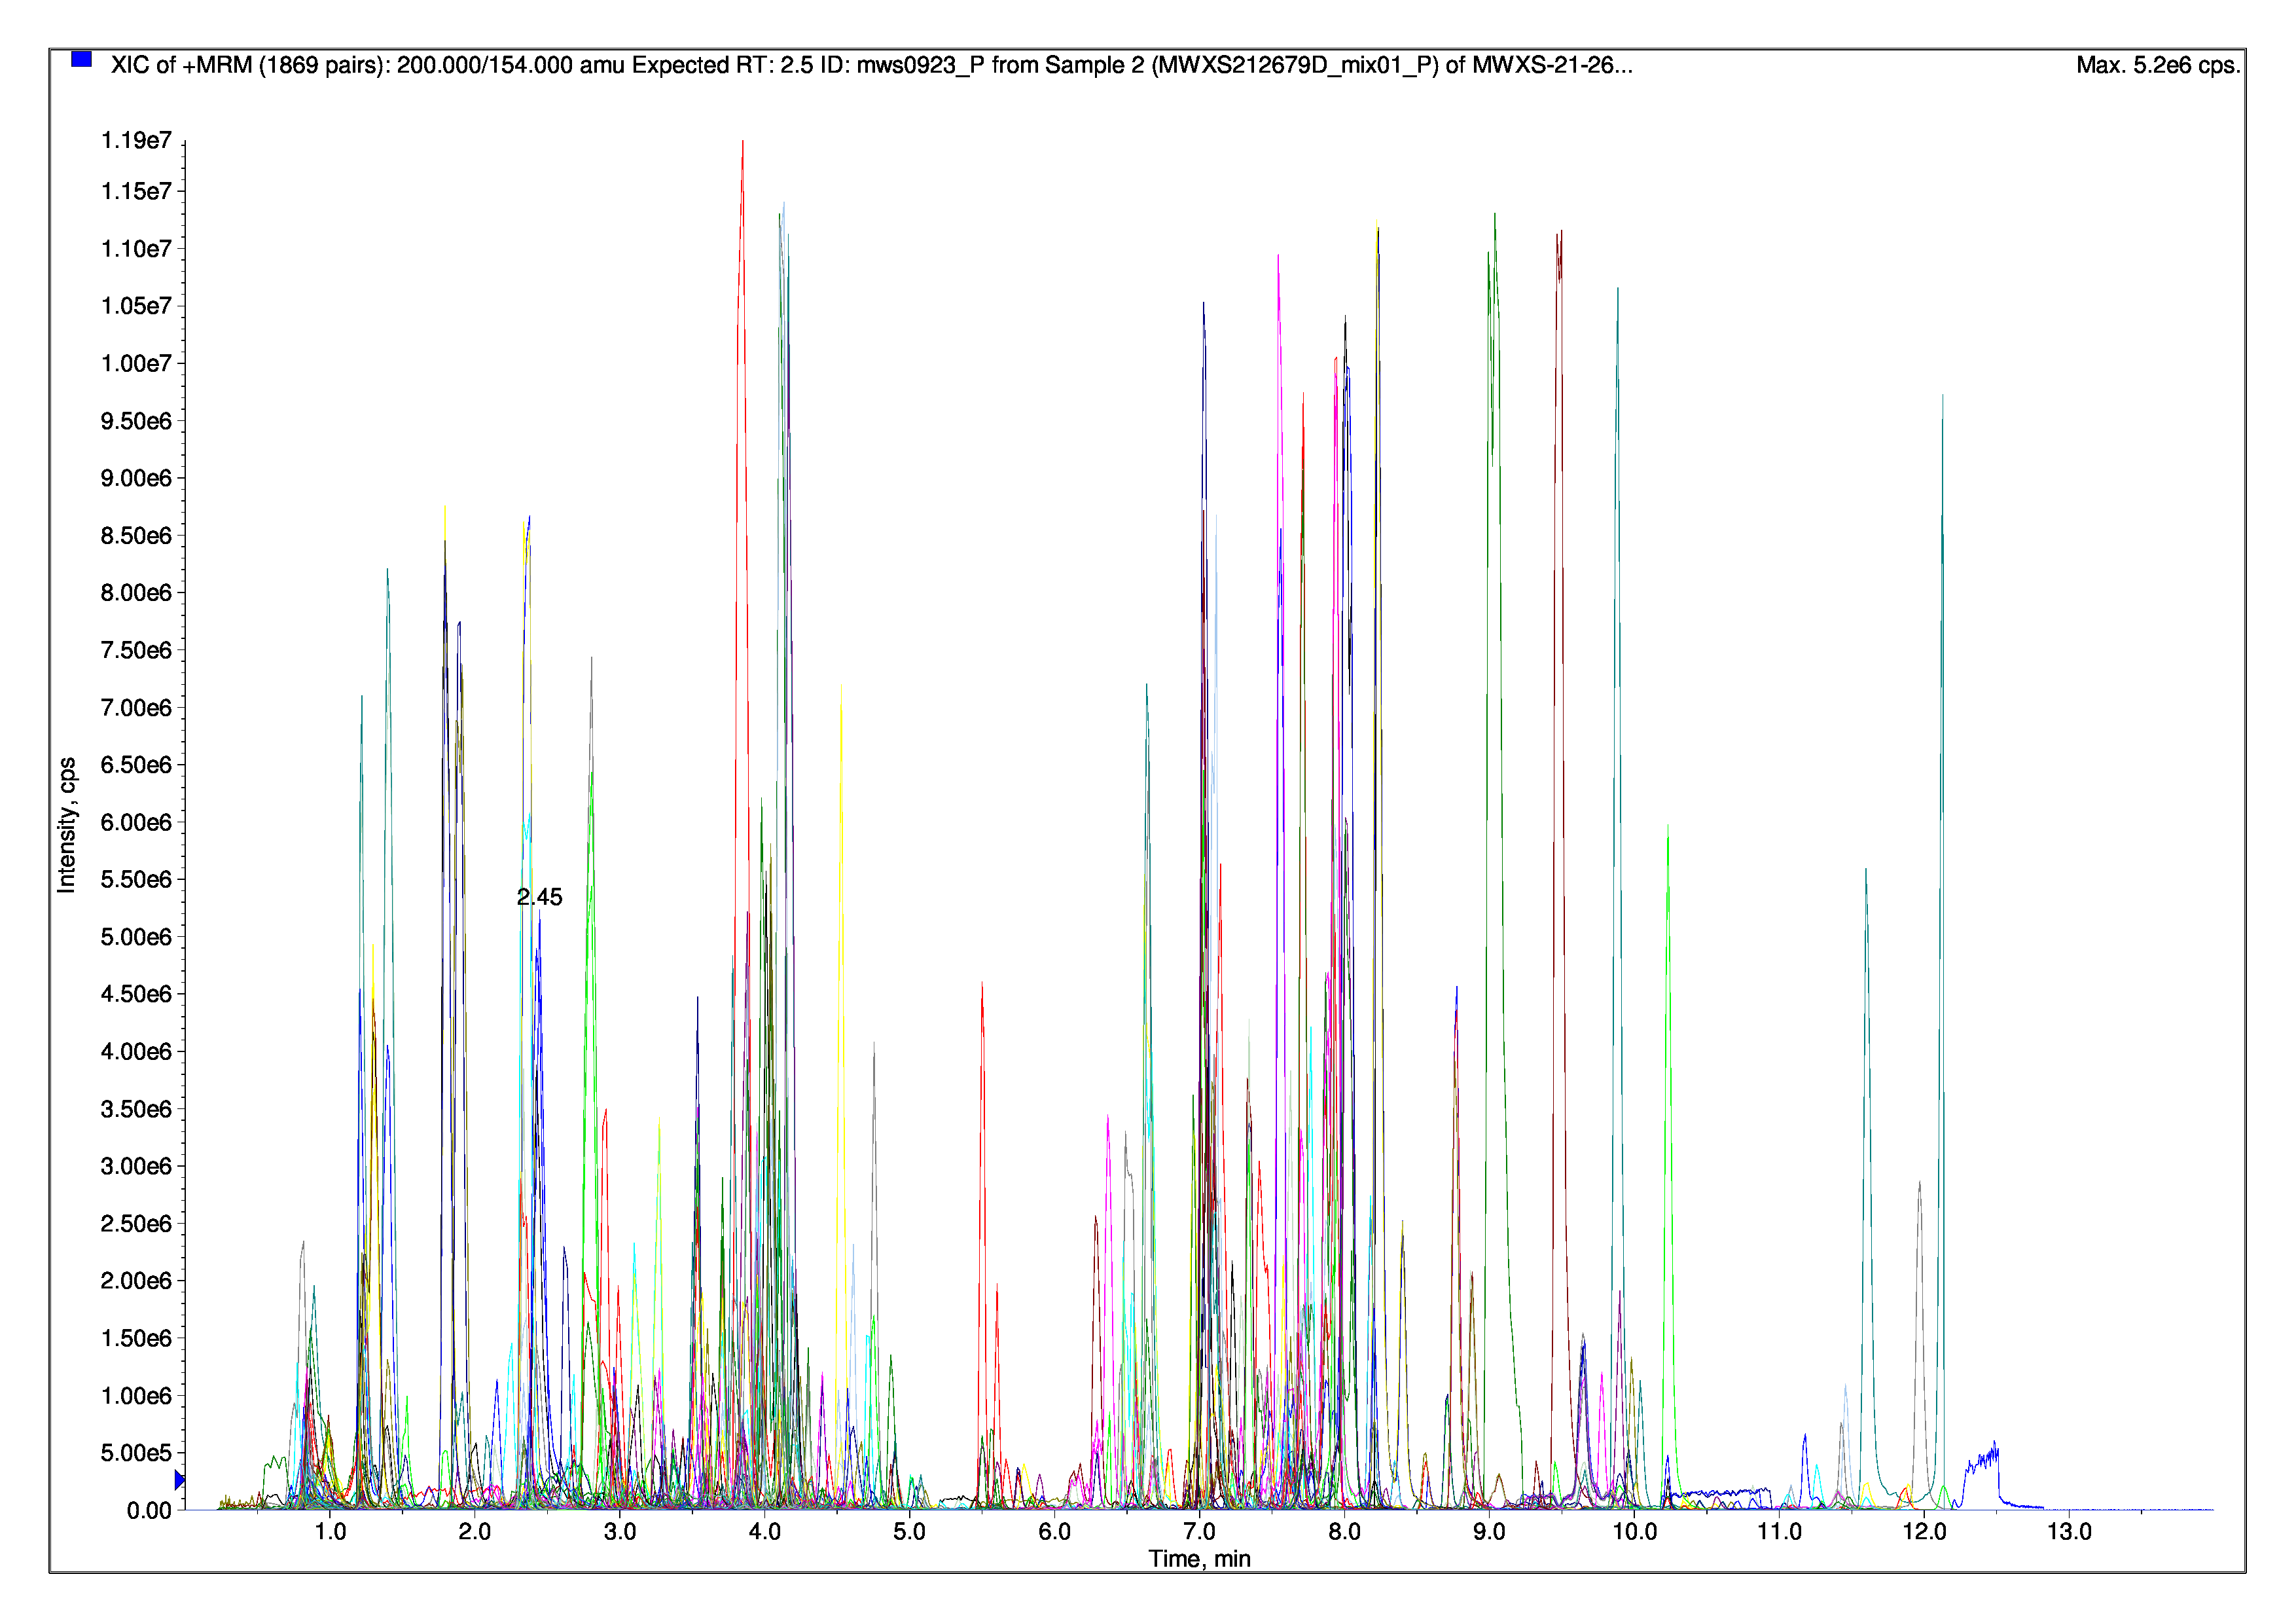


(a) Negative ion mode. (b) Positive ion mode.

**Figure S1 Total ion chromatograms in positive and negative ion modes were obtained by Liquid Chromatograph Mass Spectrometer(LC-MS).** Different colored peaks represent detected metabolites (horizontal axis represents retention time (Rt) of metabolite detection and vertical axis represents ion signal intensity (CPS).
